# Supplementary material for: Evaluation of integrated assessment model hindcast experiments: a case study of the GCAM 3.0 land use module
Source: Copernicus journal article supplement (doi:10.5194/gmd-10-4307-2017), 2017-11-29
Supplement: Supplementary file 23 [file gmd-10-4307-2017-supplement.zip]

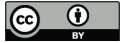

## *Supplement of*

# **Evaluation of integrated assessment model hindcast experiments: a case study of the GCAM 3.0 land use module**

**Abigail C. Snyder et al.**

*Correspondence to:* Abigail C. Snyder ([abigail.snyder@pnnl.gov](mailto:abigail.snyder@pnnl.gov))

- [gmd-10-4307-2017-supplement-title-page.pdf](#)
- LandHindcastPaper
  - .Rhistory
  - .git
    - \* COMMIT\_EDITMSG
    - \* FETCH\_HEAD
    - \* HEAD
    - \* config
    - \* description
    - \* hooks
    - \* index
    - \* info
    - \* logs
    - \* objects
    - \* packed-refs
    - \* refs
  - Data
    - \* HindcastDataCrops.csv
    - \* HindcastDataCrops\_detrended.csv
    - \* fao\_harvested\_area.csv
  - LICENSE
  - LandHindcastMain.R
  - Outputs
    - \* FullFigures
    - \* GCAM\_Hist\_Forecast
    - \* GCAM\_Hist\_Forecast\_Bio

- \* GCAM\_History
- \* GCAM\_History\_Bio
- \* PaperFigures
- README.md
- Scripts
  - \* CoreStats\_2.R
  - \* DetrendData\_1.R
  - \* Figures\_full\_4.R
  - \* Figures\_paper\_3.R

The copyright of individual parts of the supplement might differ from the CC BY 3.0 License.
