# Supplementary figures and images for: Evaluation of integrated assessment model hindcast experiments: a case study of the GCAM 3.0 land use module
Source: Copernicus journal article supplement (doi:10.5194/gmd-10-4307-2017), 2017-11-29

Global Bias

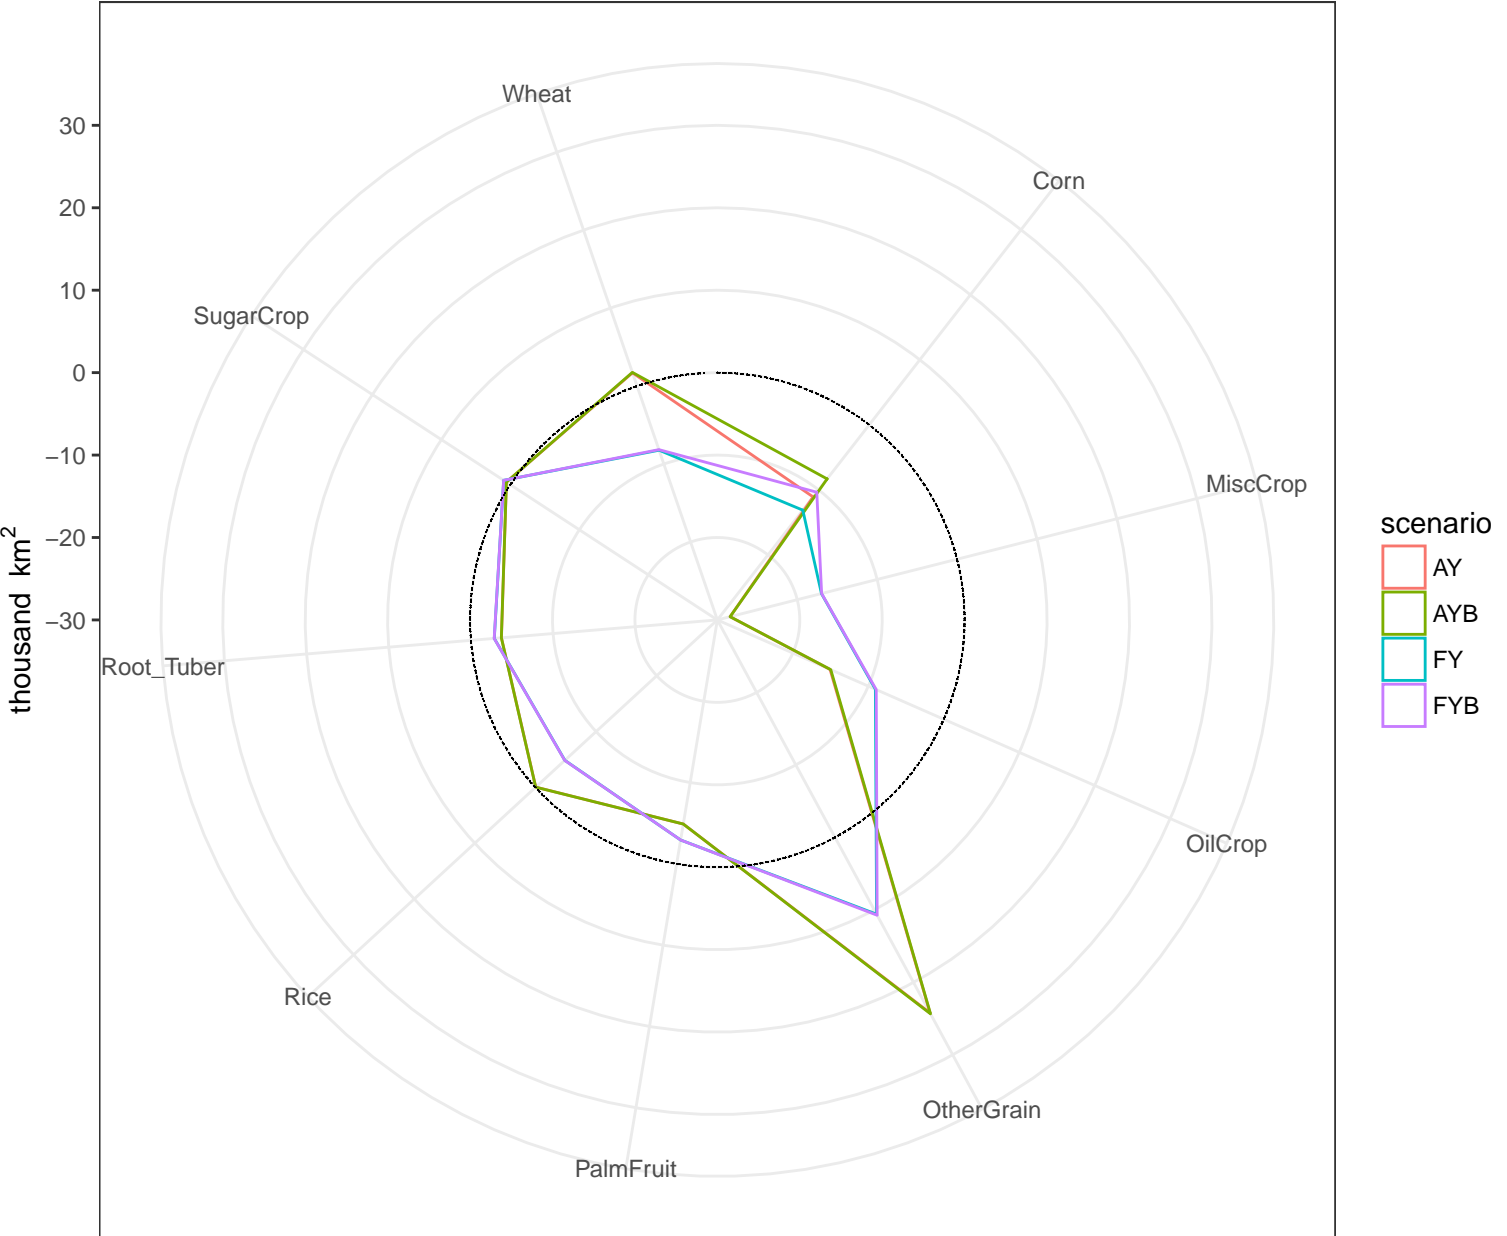

Supplement: Supplementary file 1 [file gmd-10-4307-2017-supplement.zip]

Global Bias



Supplement: Supplementary file 2 [file gmd-10-4307-2017-supplement.zip]

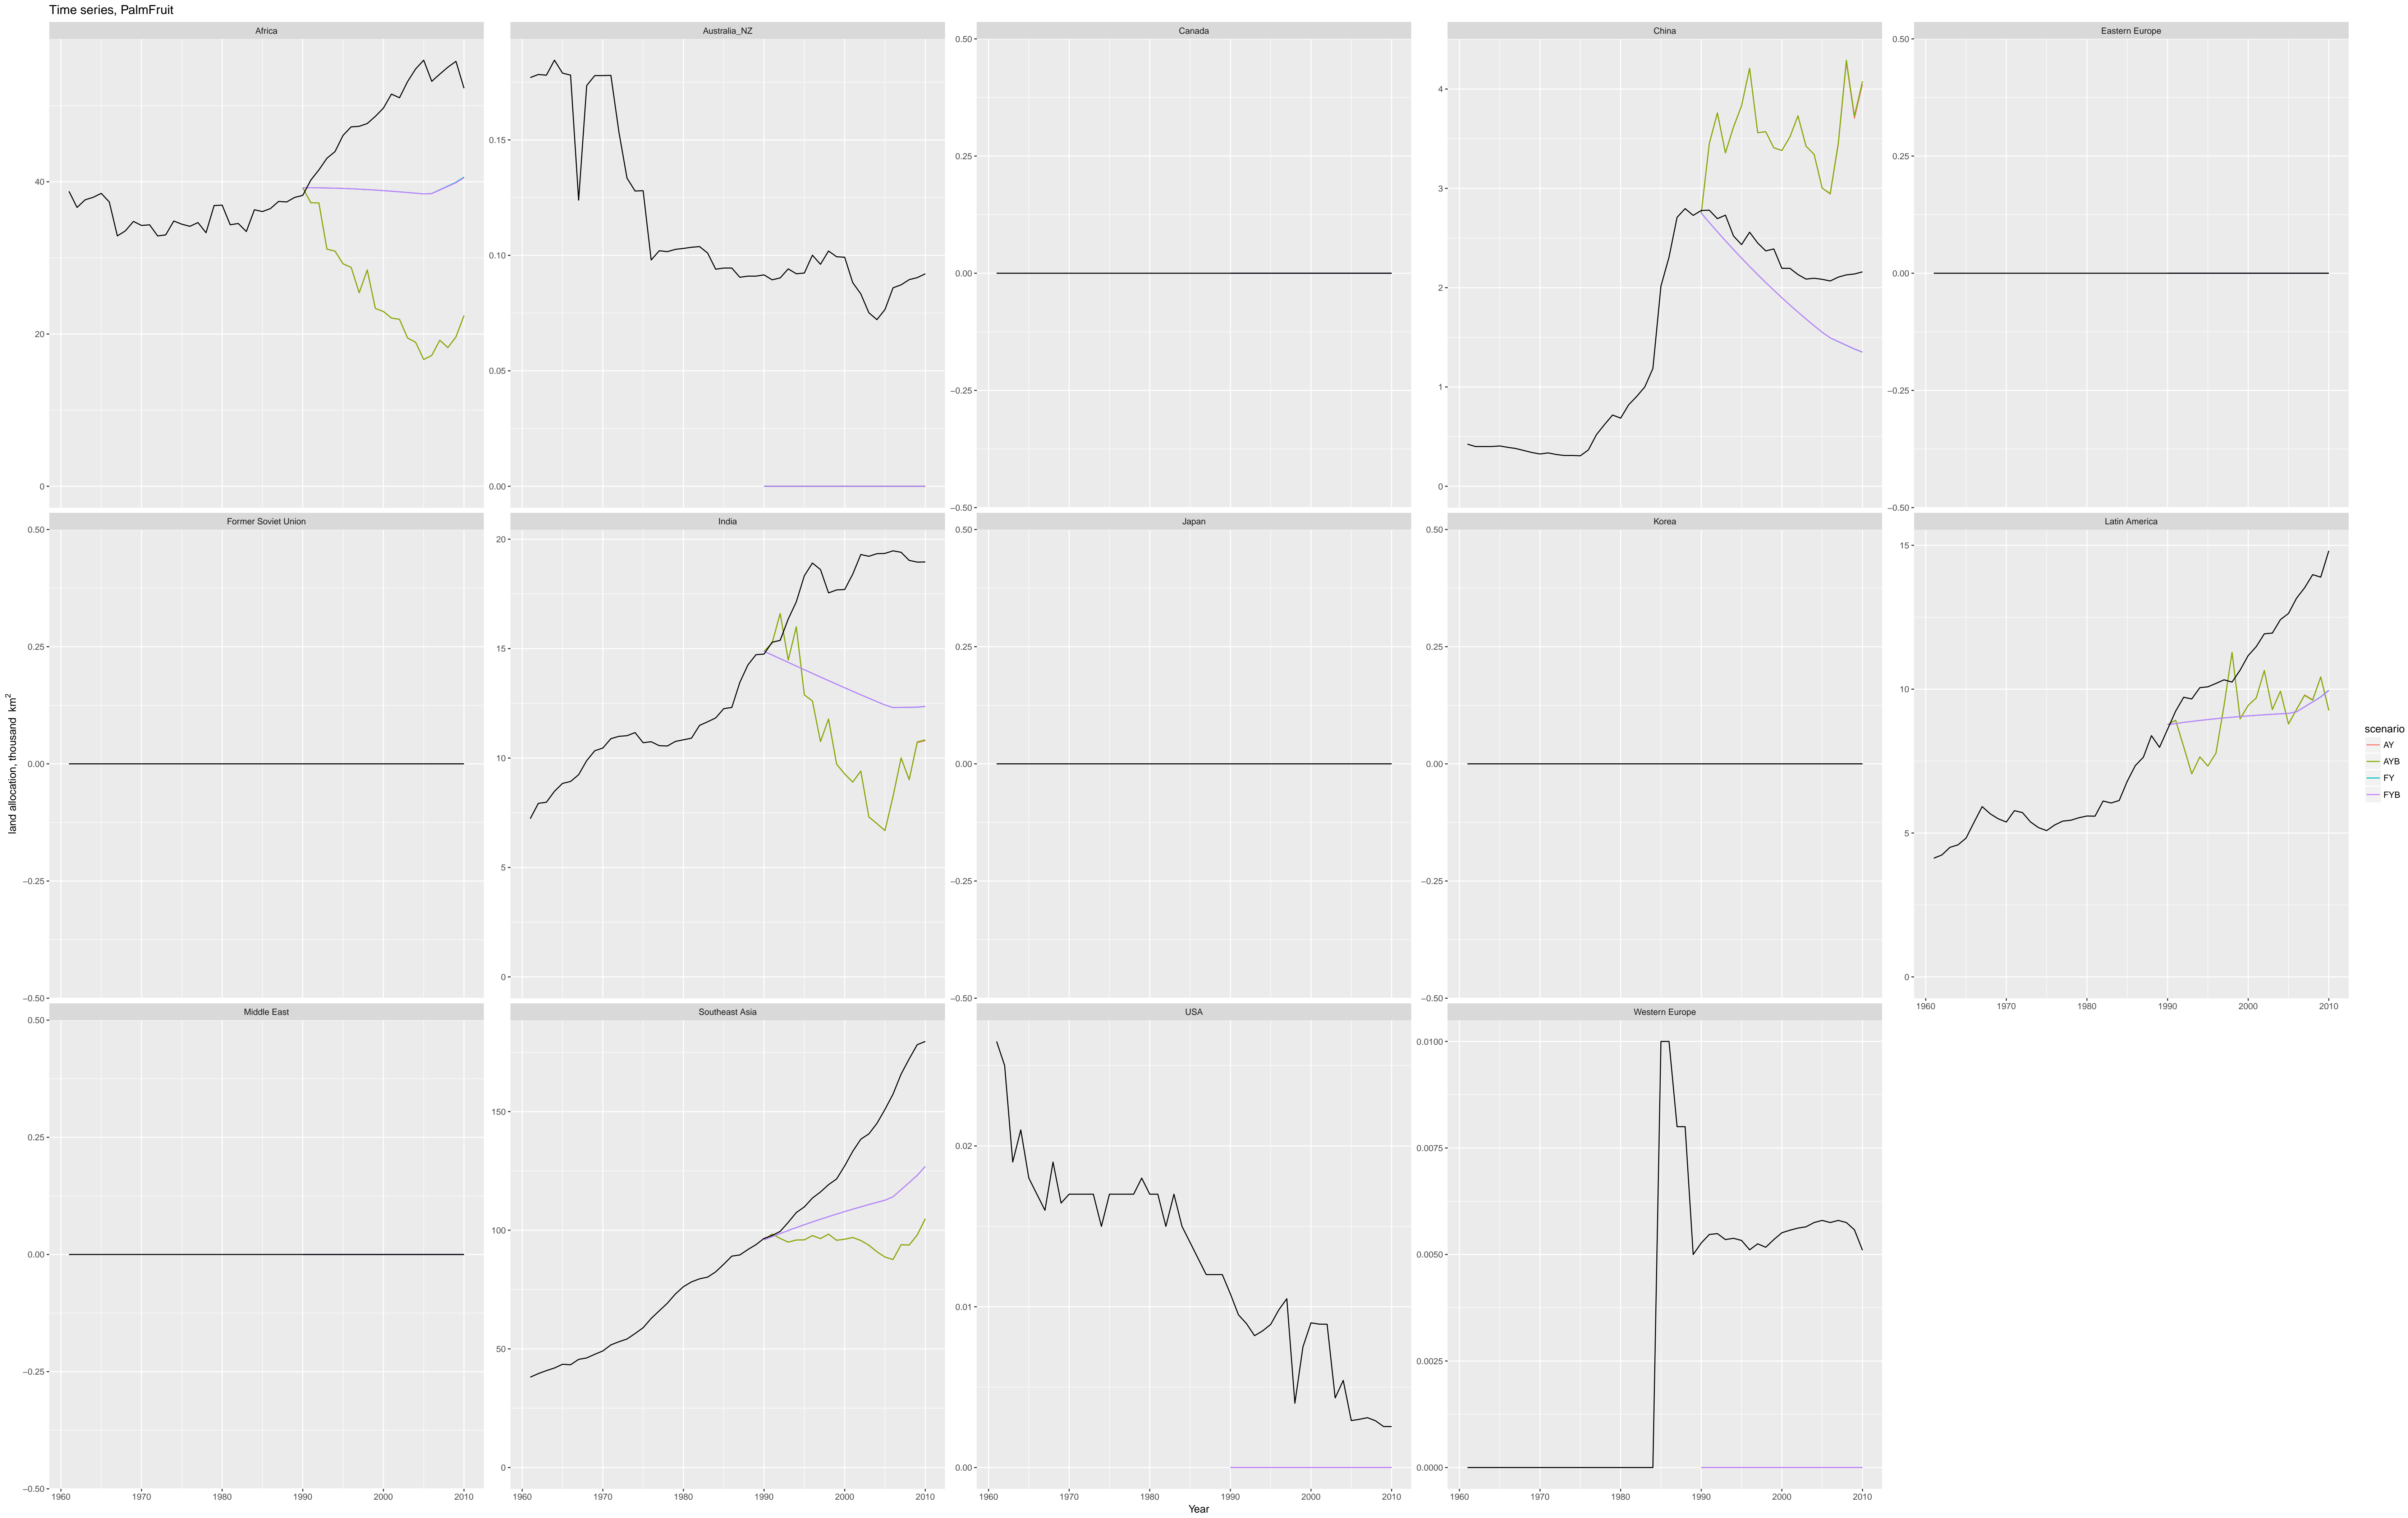

Supplement: Supplementary file 3 [file gmd-10-4307-2017-supplement.zip]

# Normalized RMSE, Wheat

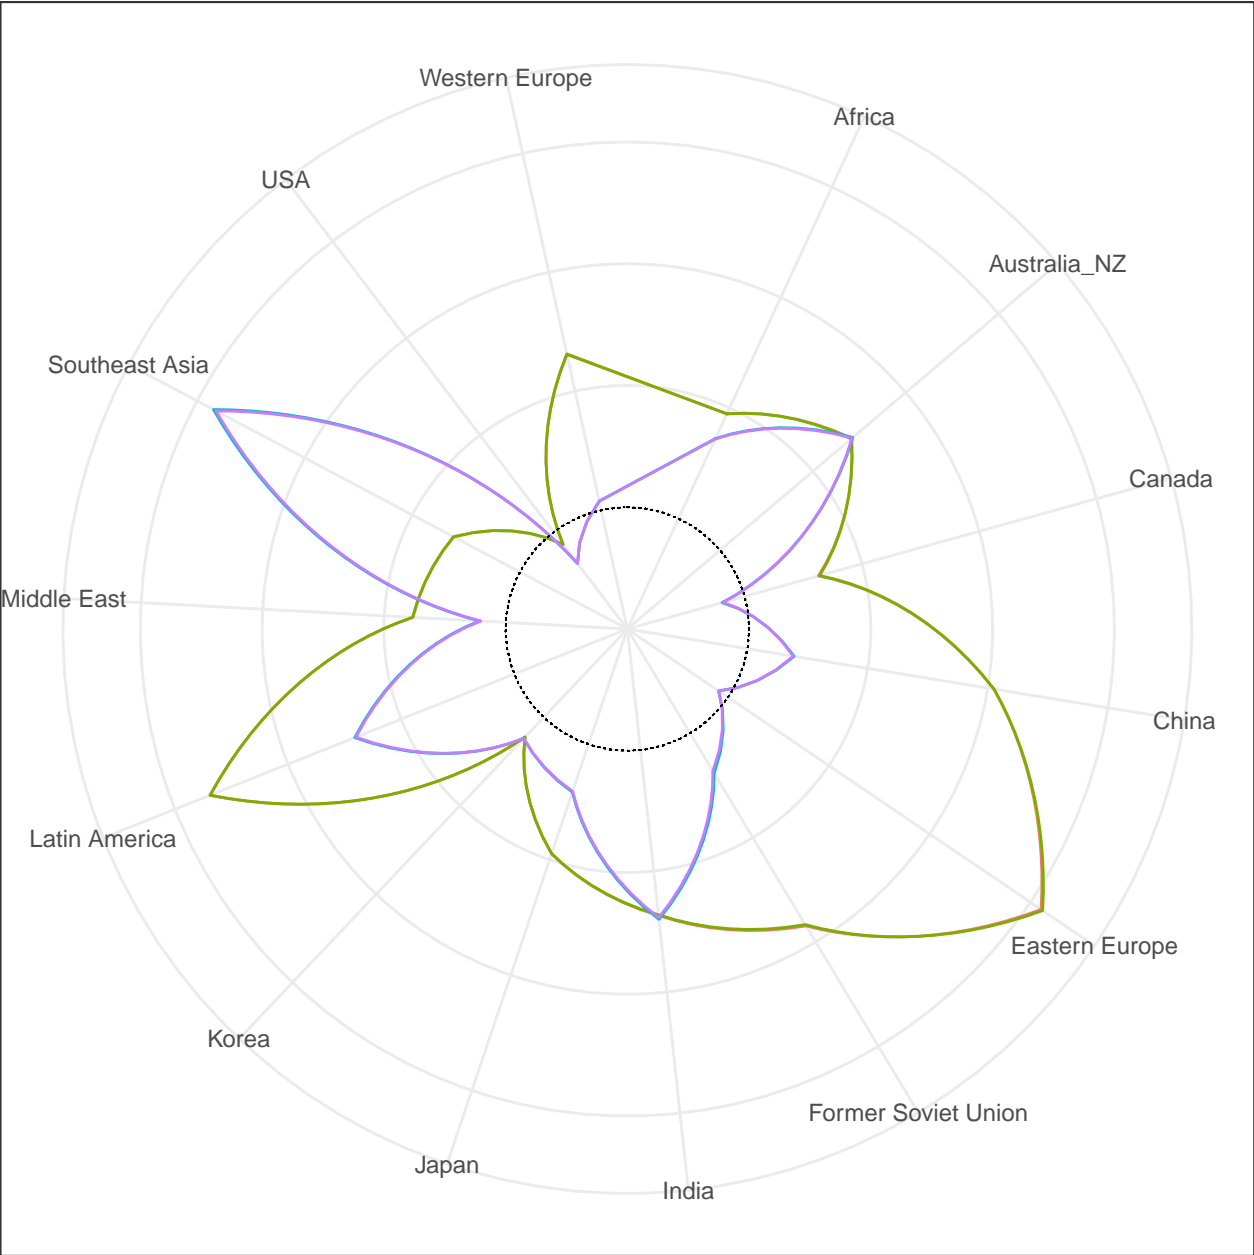

scenario

- AY
- AYB
- FY
- FYB

Supplement: Supplementary file 4 [file gmd-10-4307-2017-supplement.zip]

# Normalized RMSE, USA

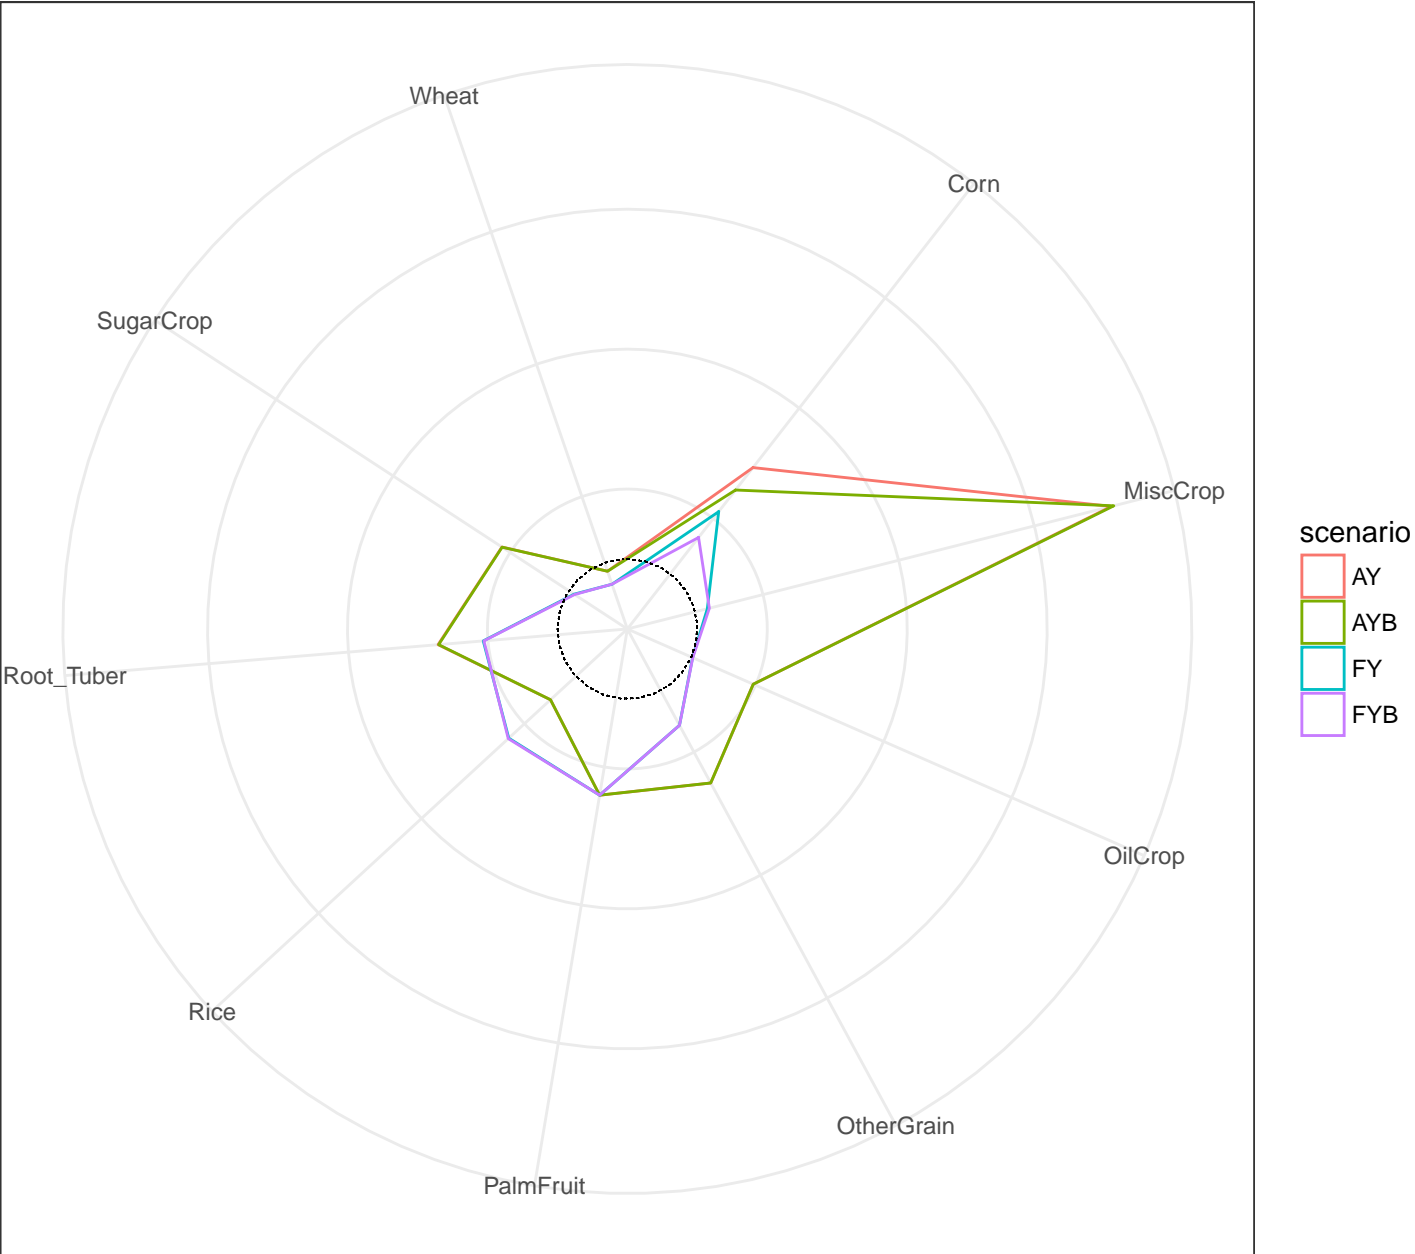

Supplement: Supplementary file 5 [file gmd-10-4307-2017-supplement.zip]

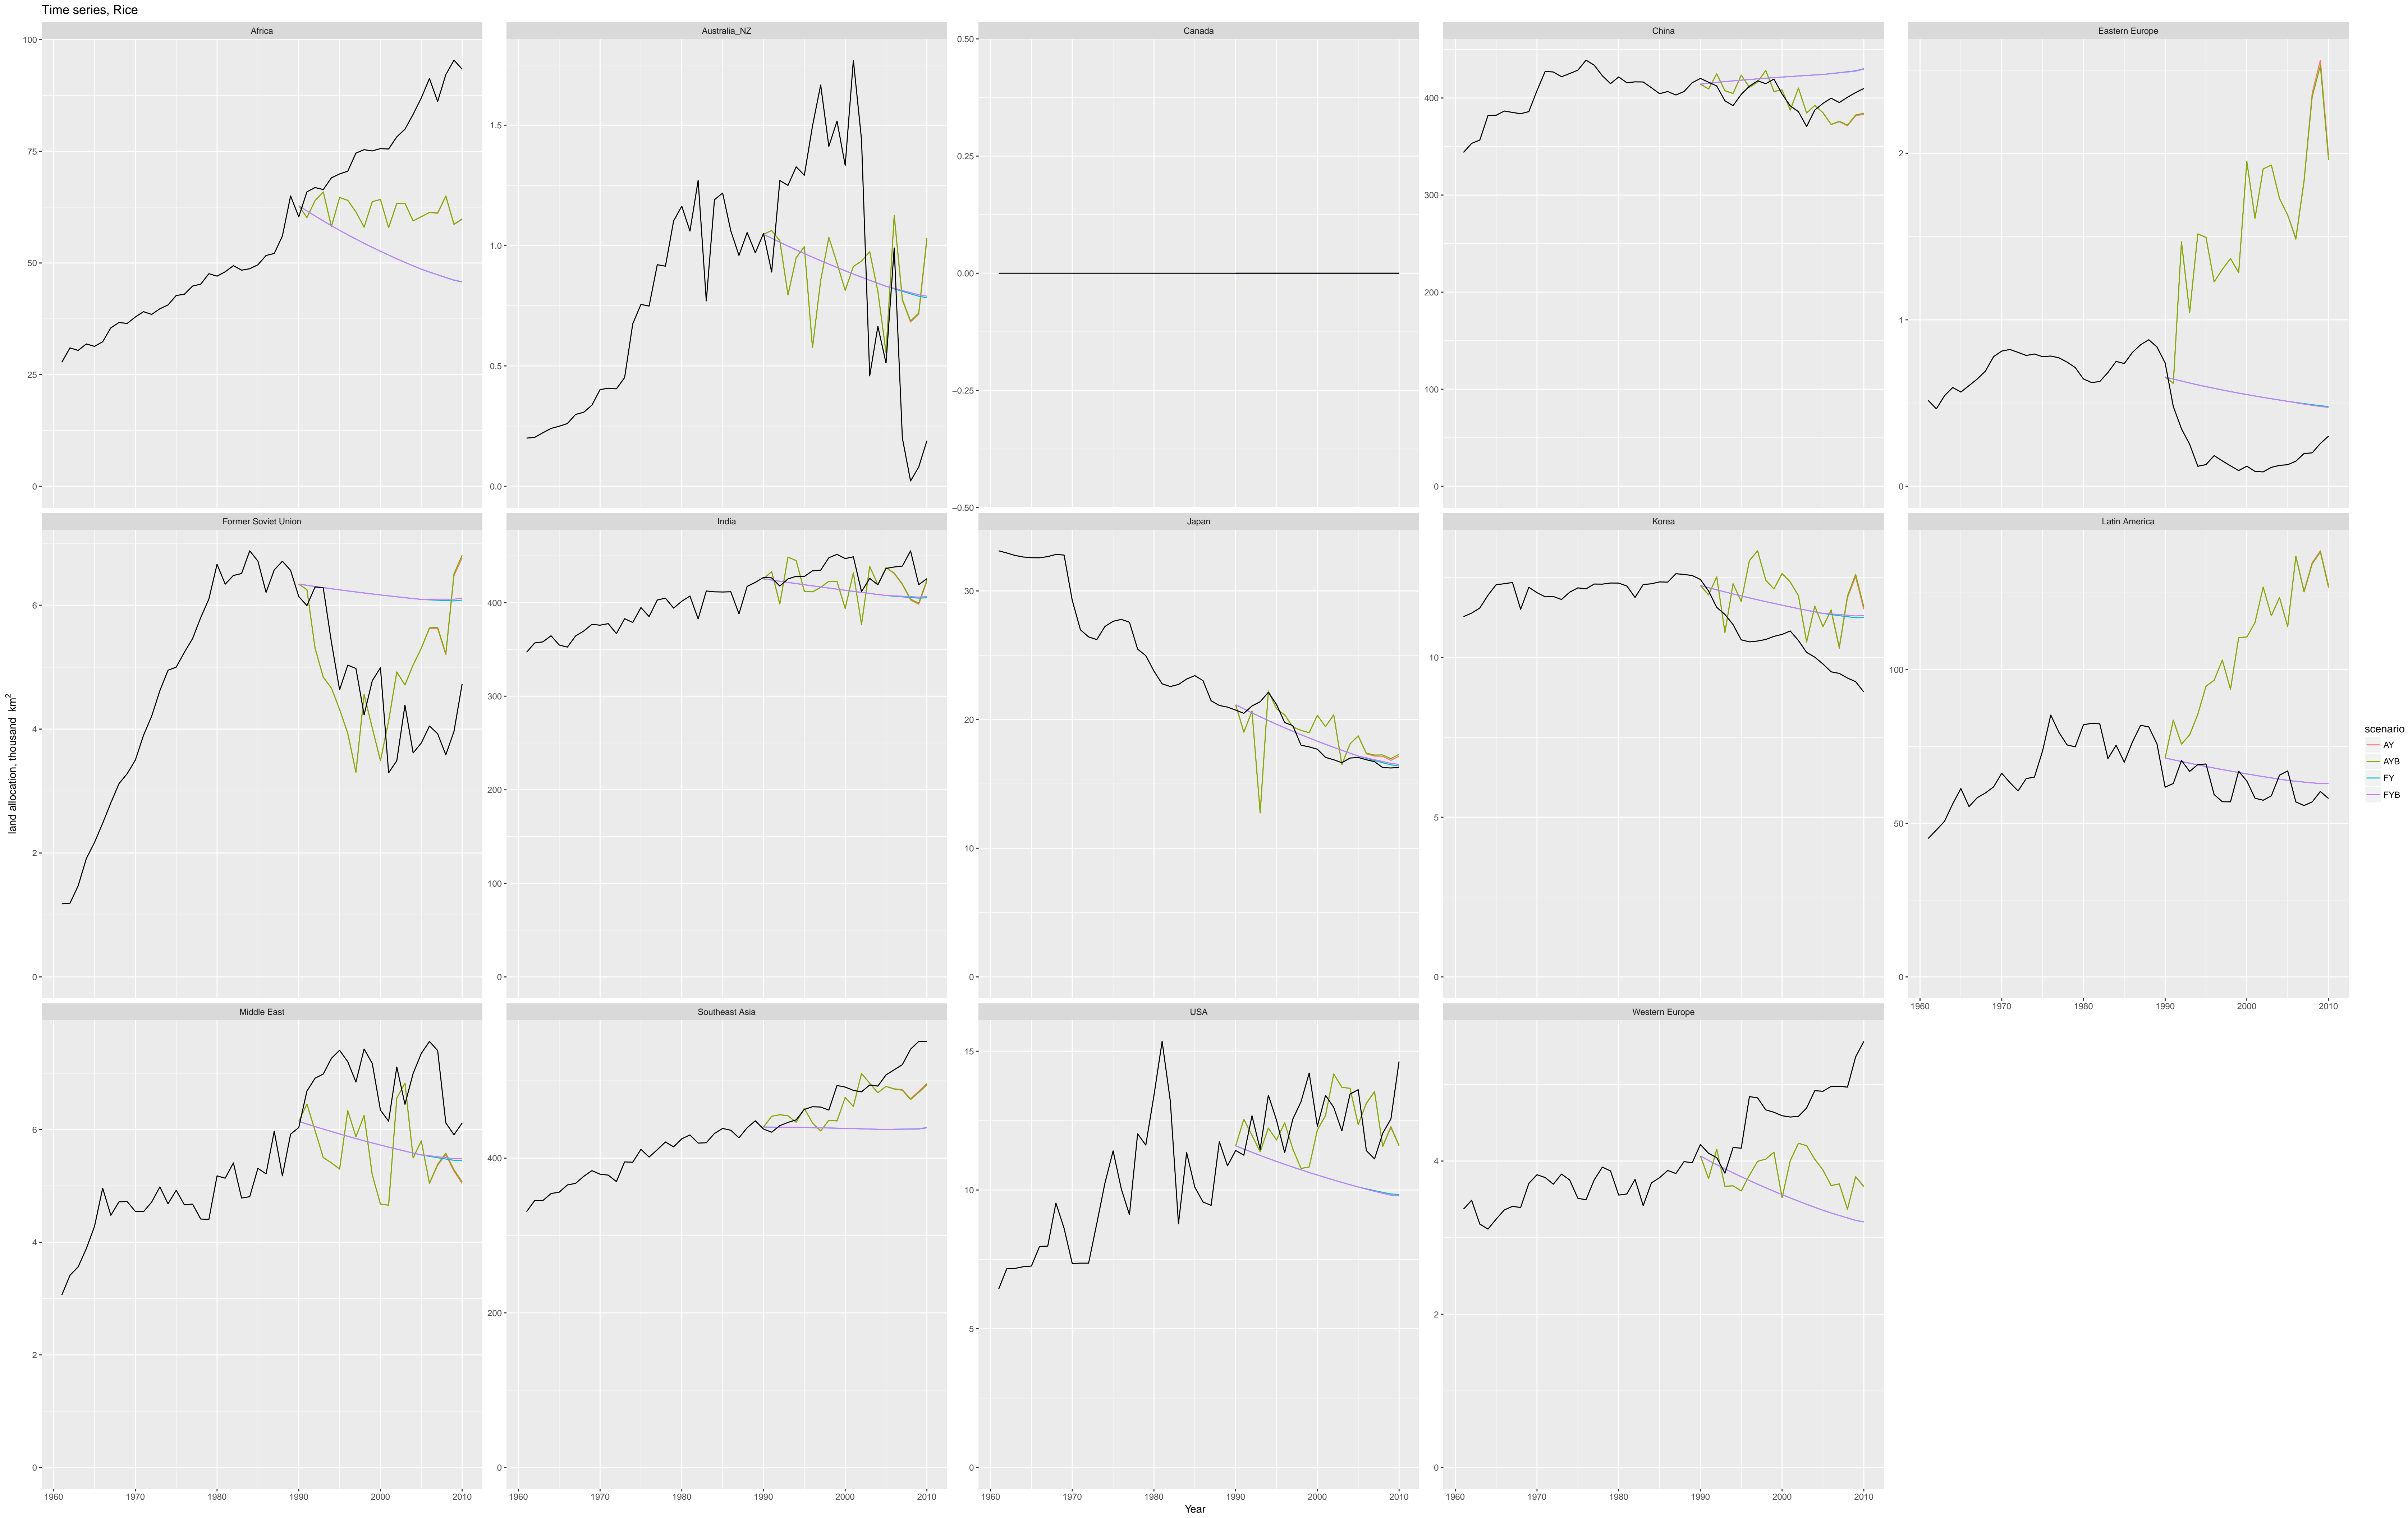

Supplement: Supplementary file 6 [file gmd-10-4307-2017-supplement.zip]

# Global Absolute Bias

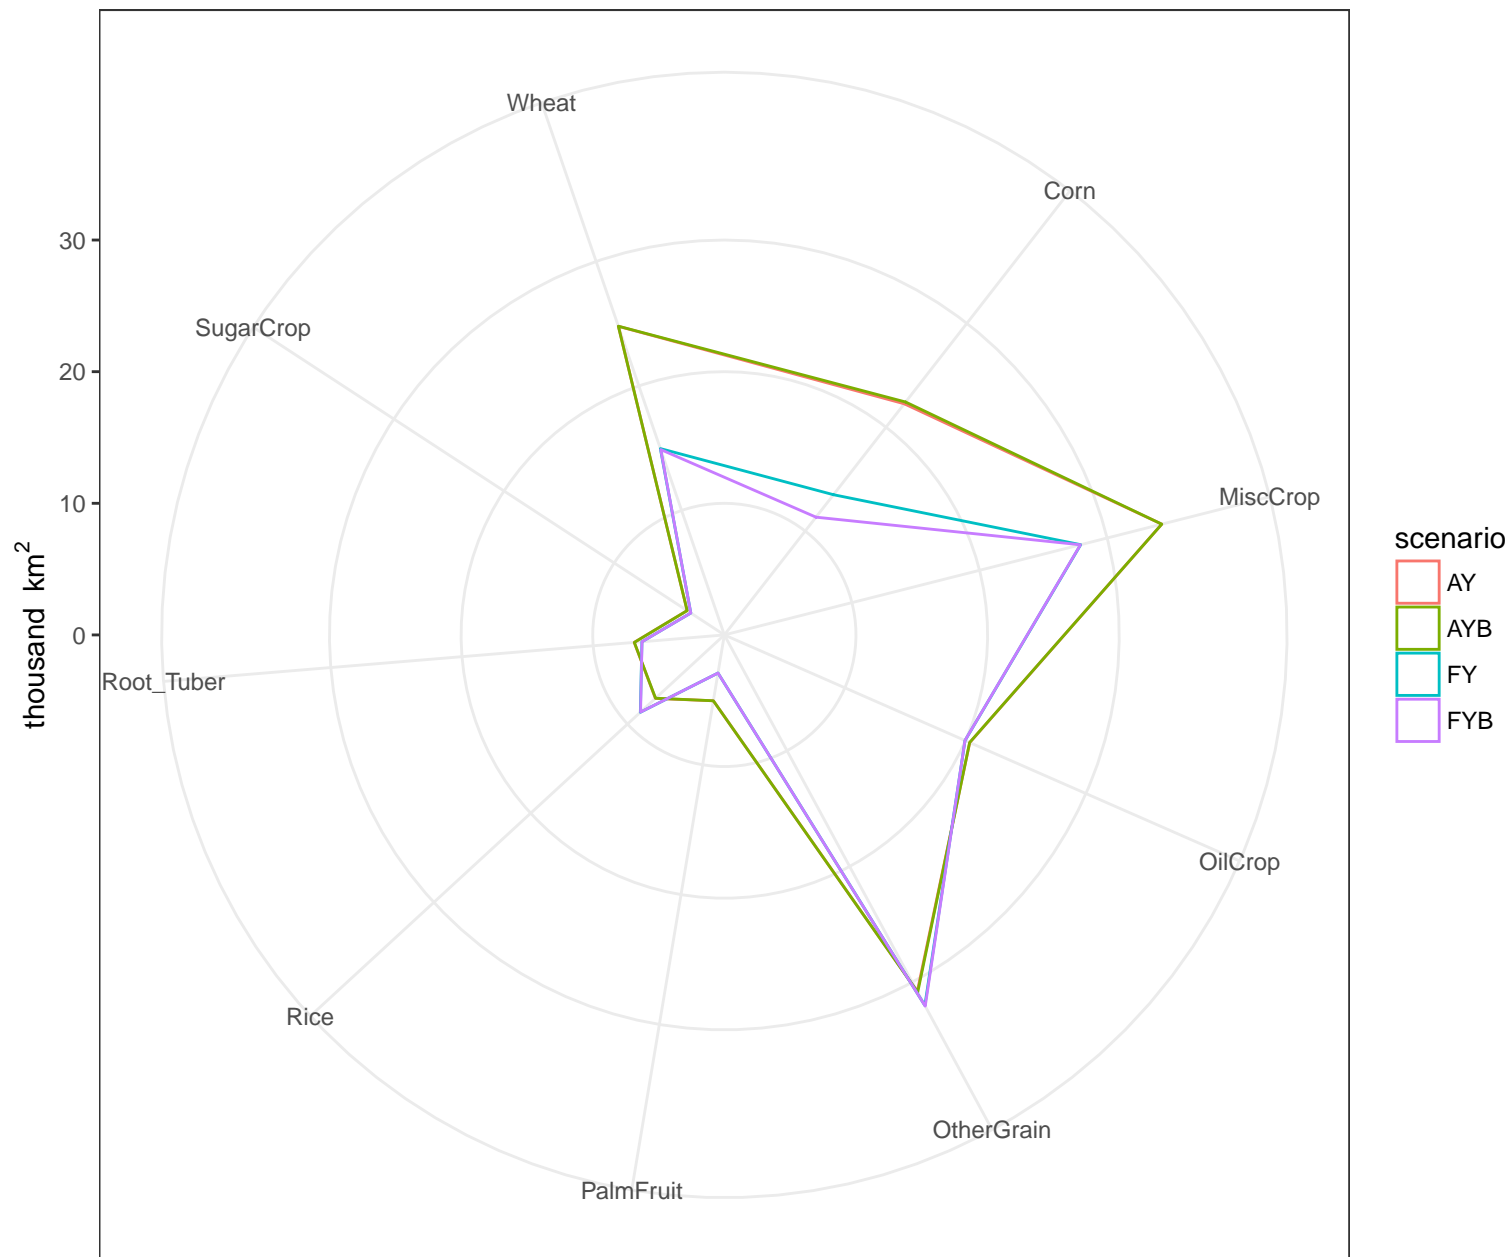

Supplement: Supplementary file 7 [file gmd-10-4307-2017-supplement.zip]

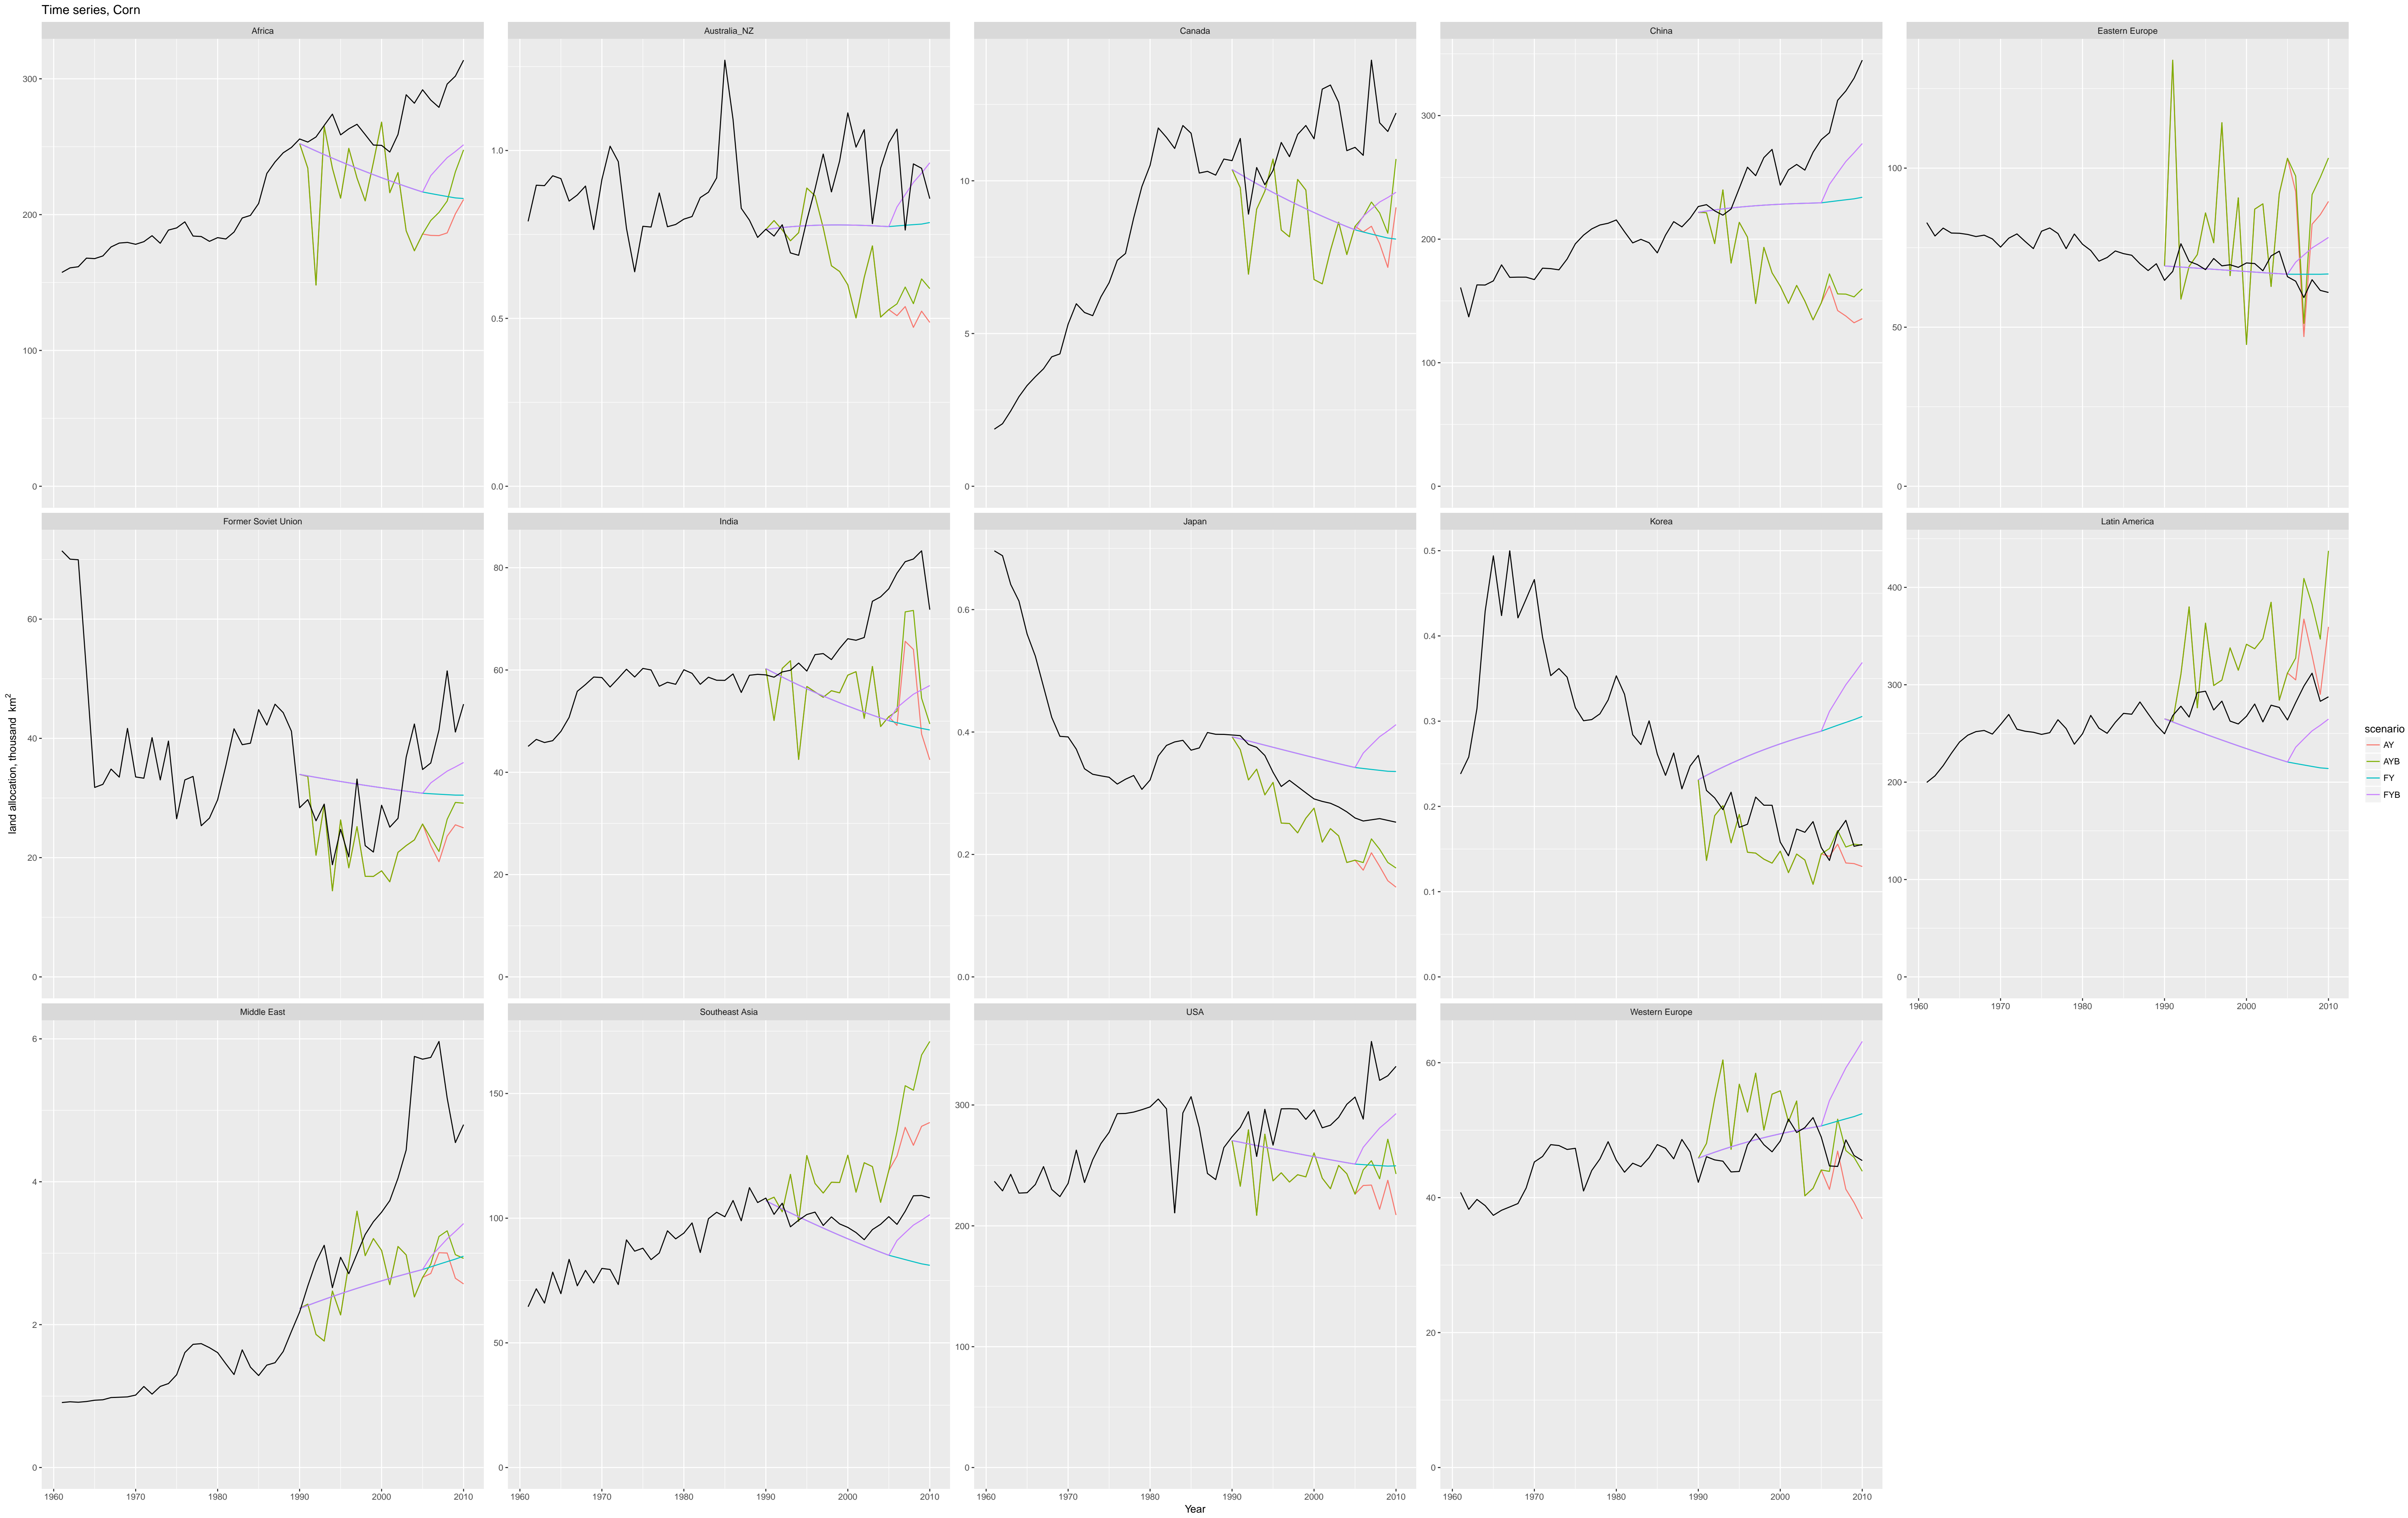

Supplement: Supplementary file 8 [file gmd-10-4307-2017-supplement.zip]

# Normalized centered RMSE, USA

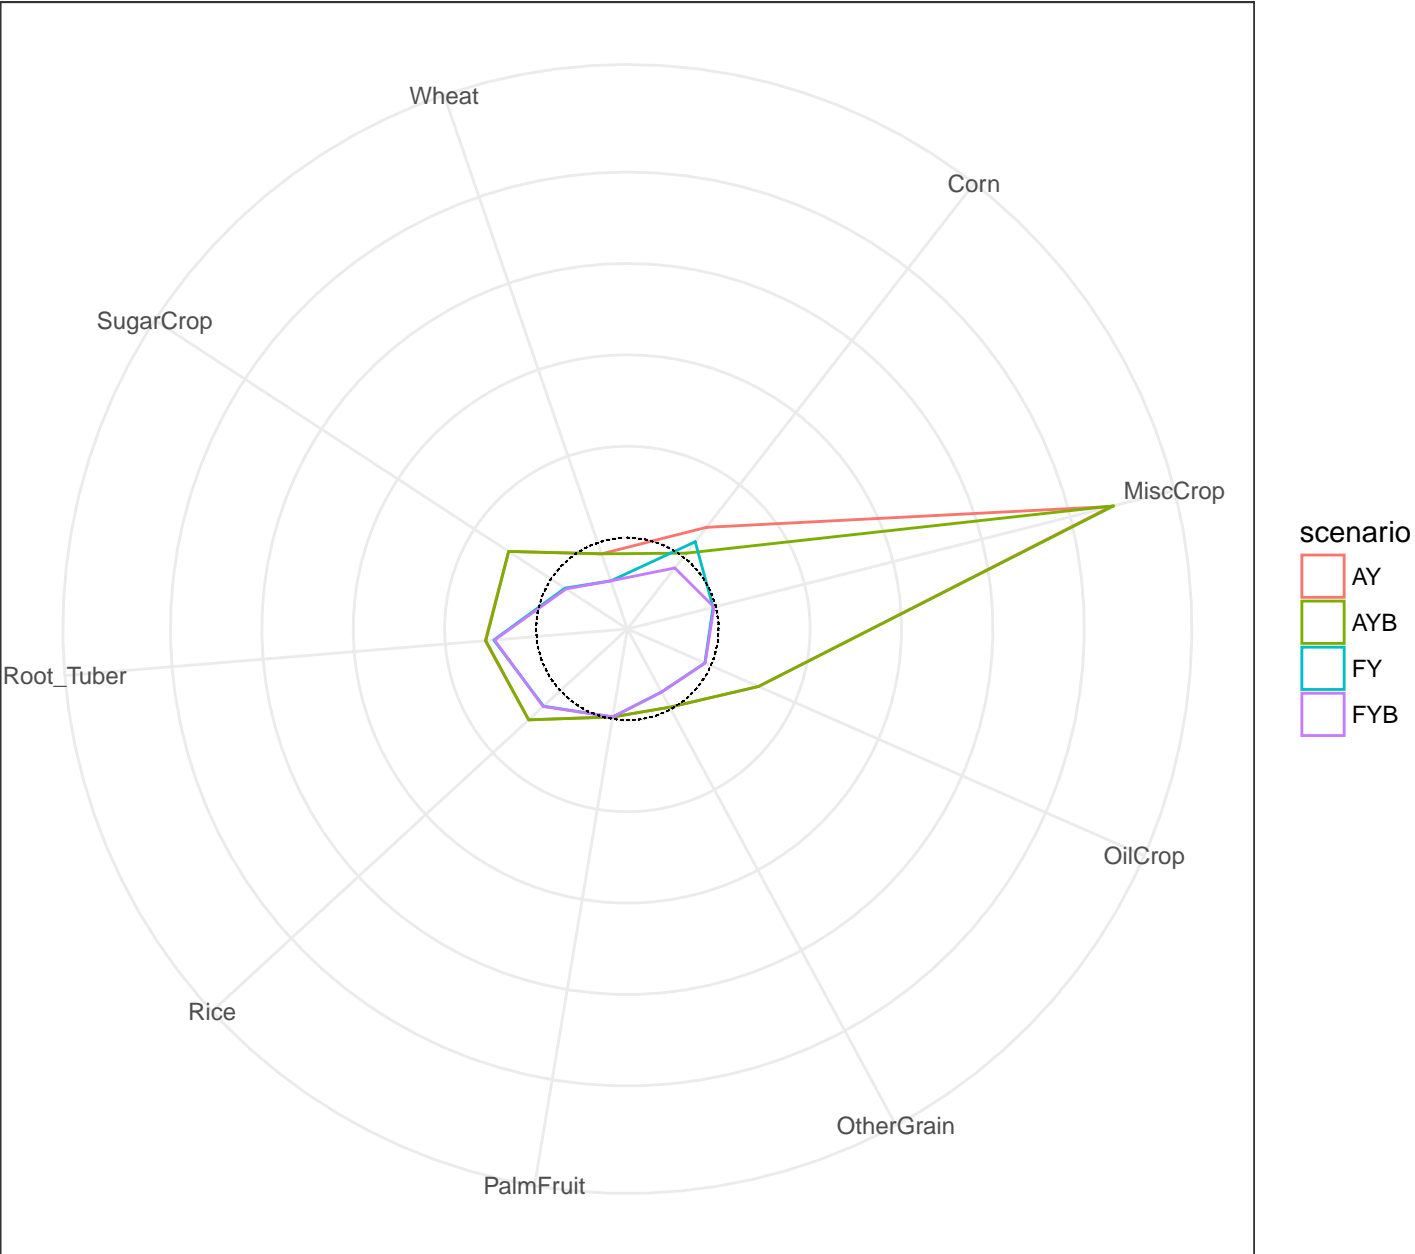

Supplement: Supplementary file 9 [file gmd-10-4307-2017-supplement.zip]

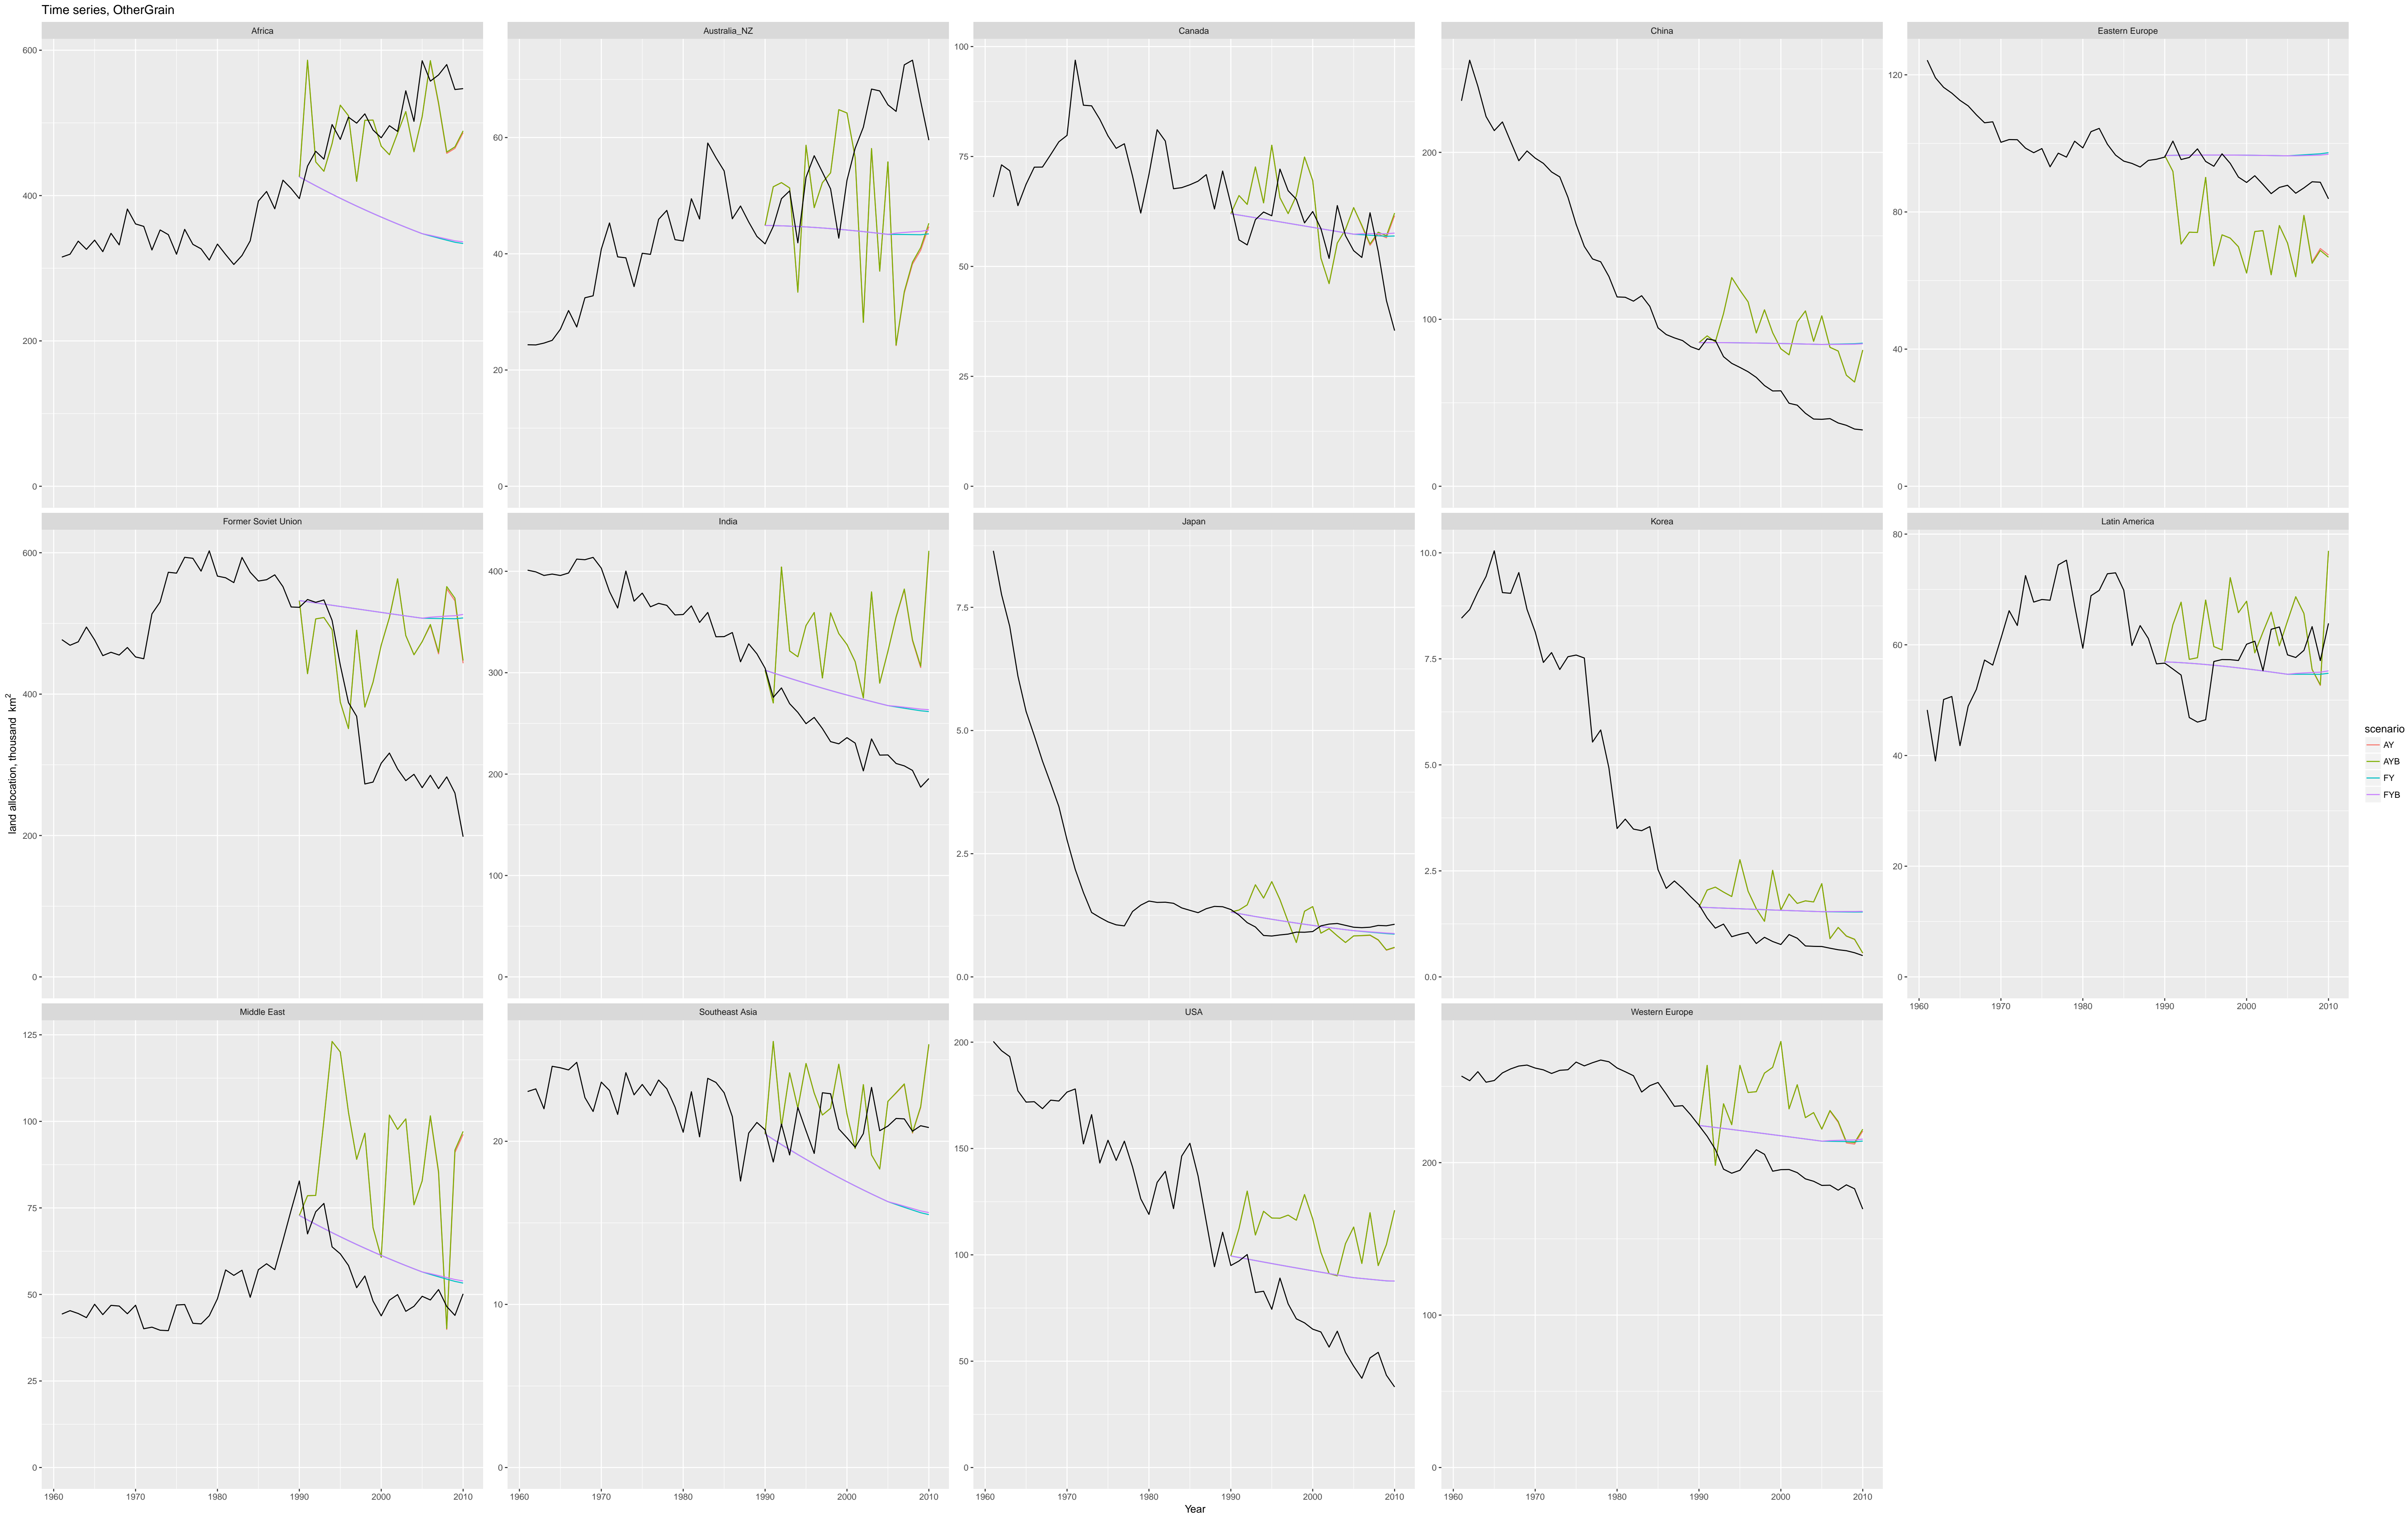

Supplement: Supplementary file 10 [file gmd-10-4307-2017-supplement.zip]

# Global Absolute Bias



Supplement: Supplementary file 11 [file gmd-10-4307-2017-supplement.zip]

# Normalized RMSE, USA



Supplement: Supplementary file 12 [file gmd-10-4307-2017-supplement.zip]

Normalized RMSE, all crops for each region

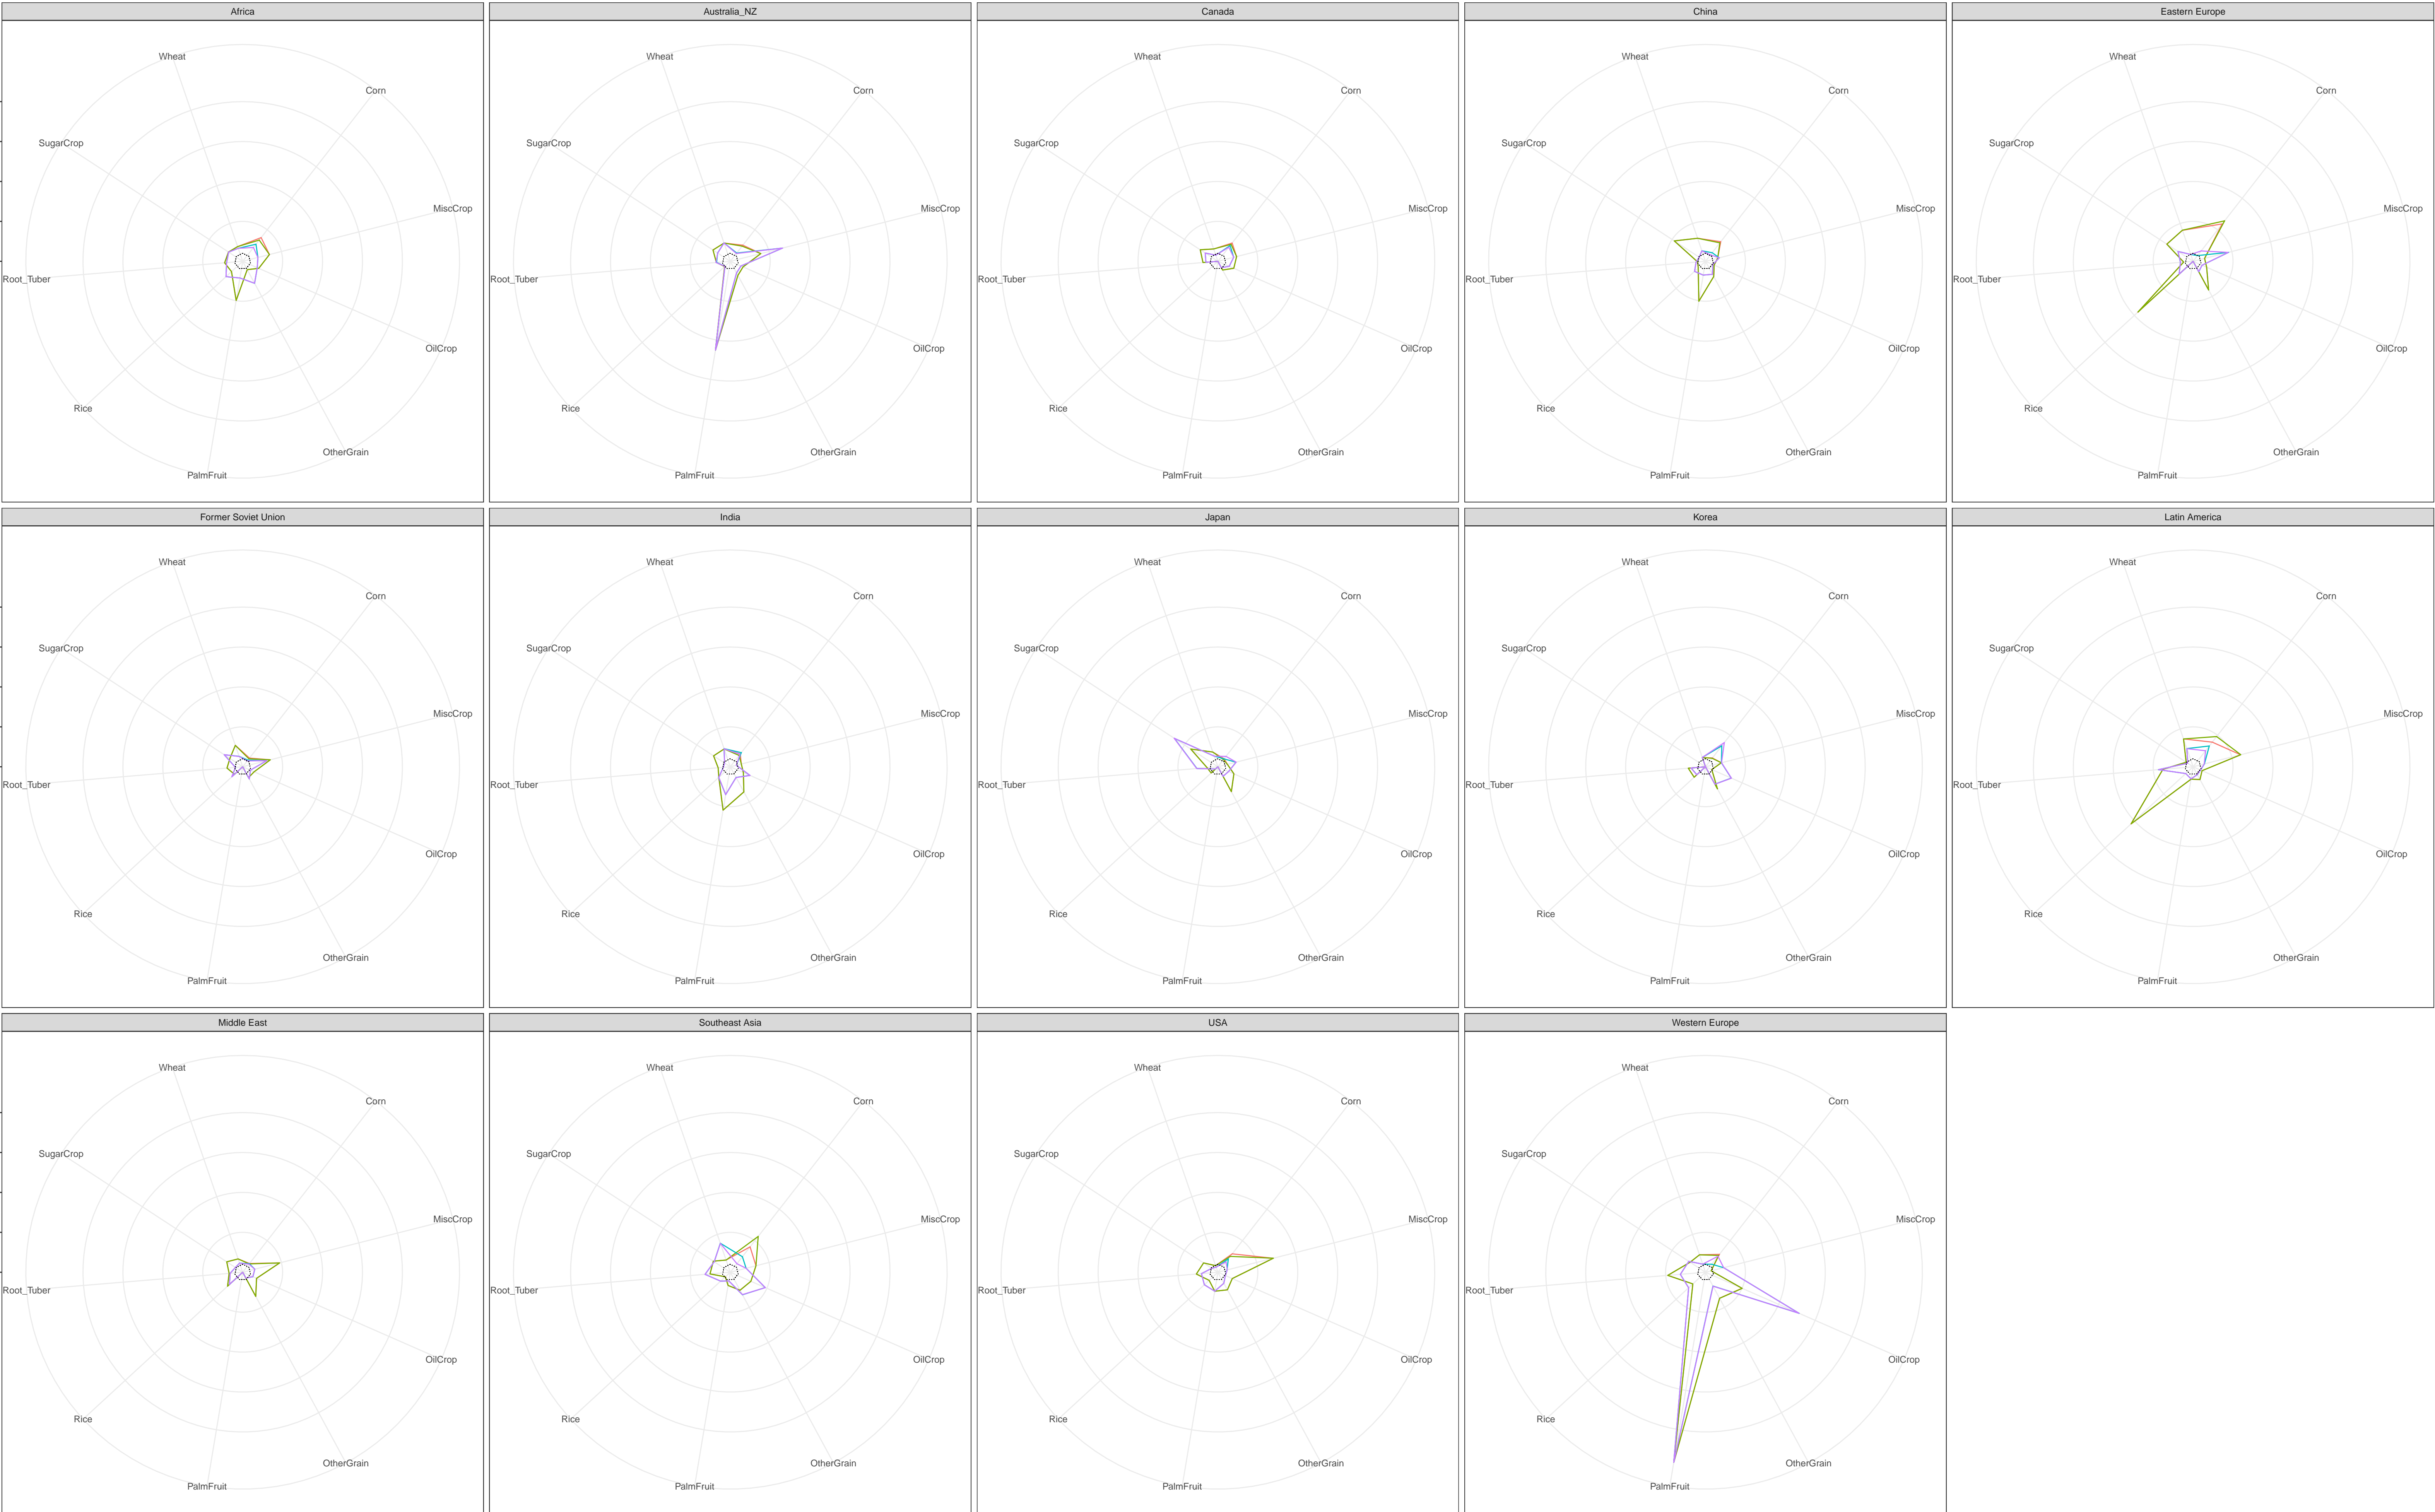

Supplement: Supplementary file 13 [file gmd-10-4307-2017-supplement.zip]

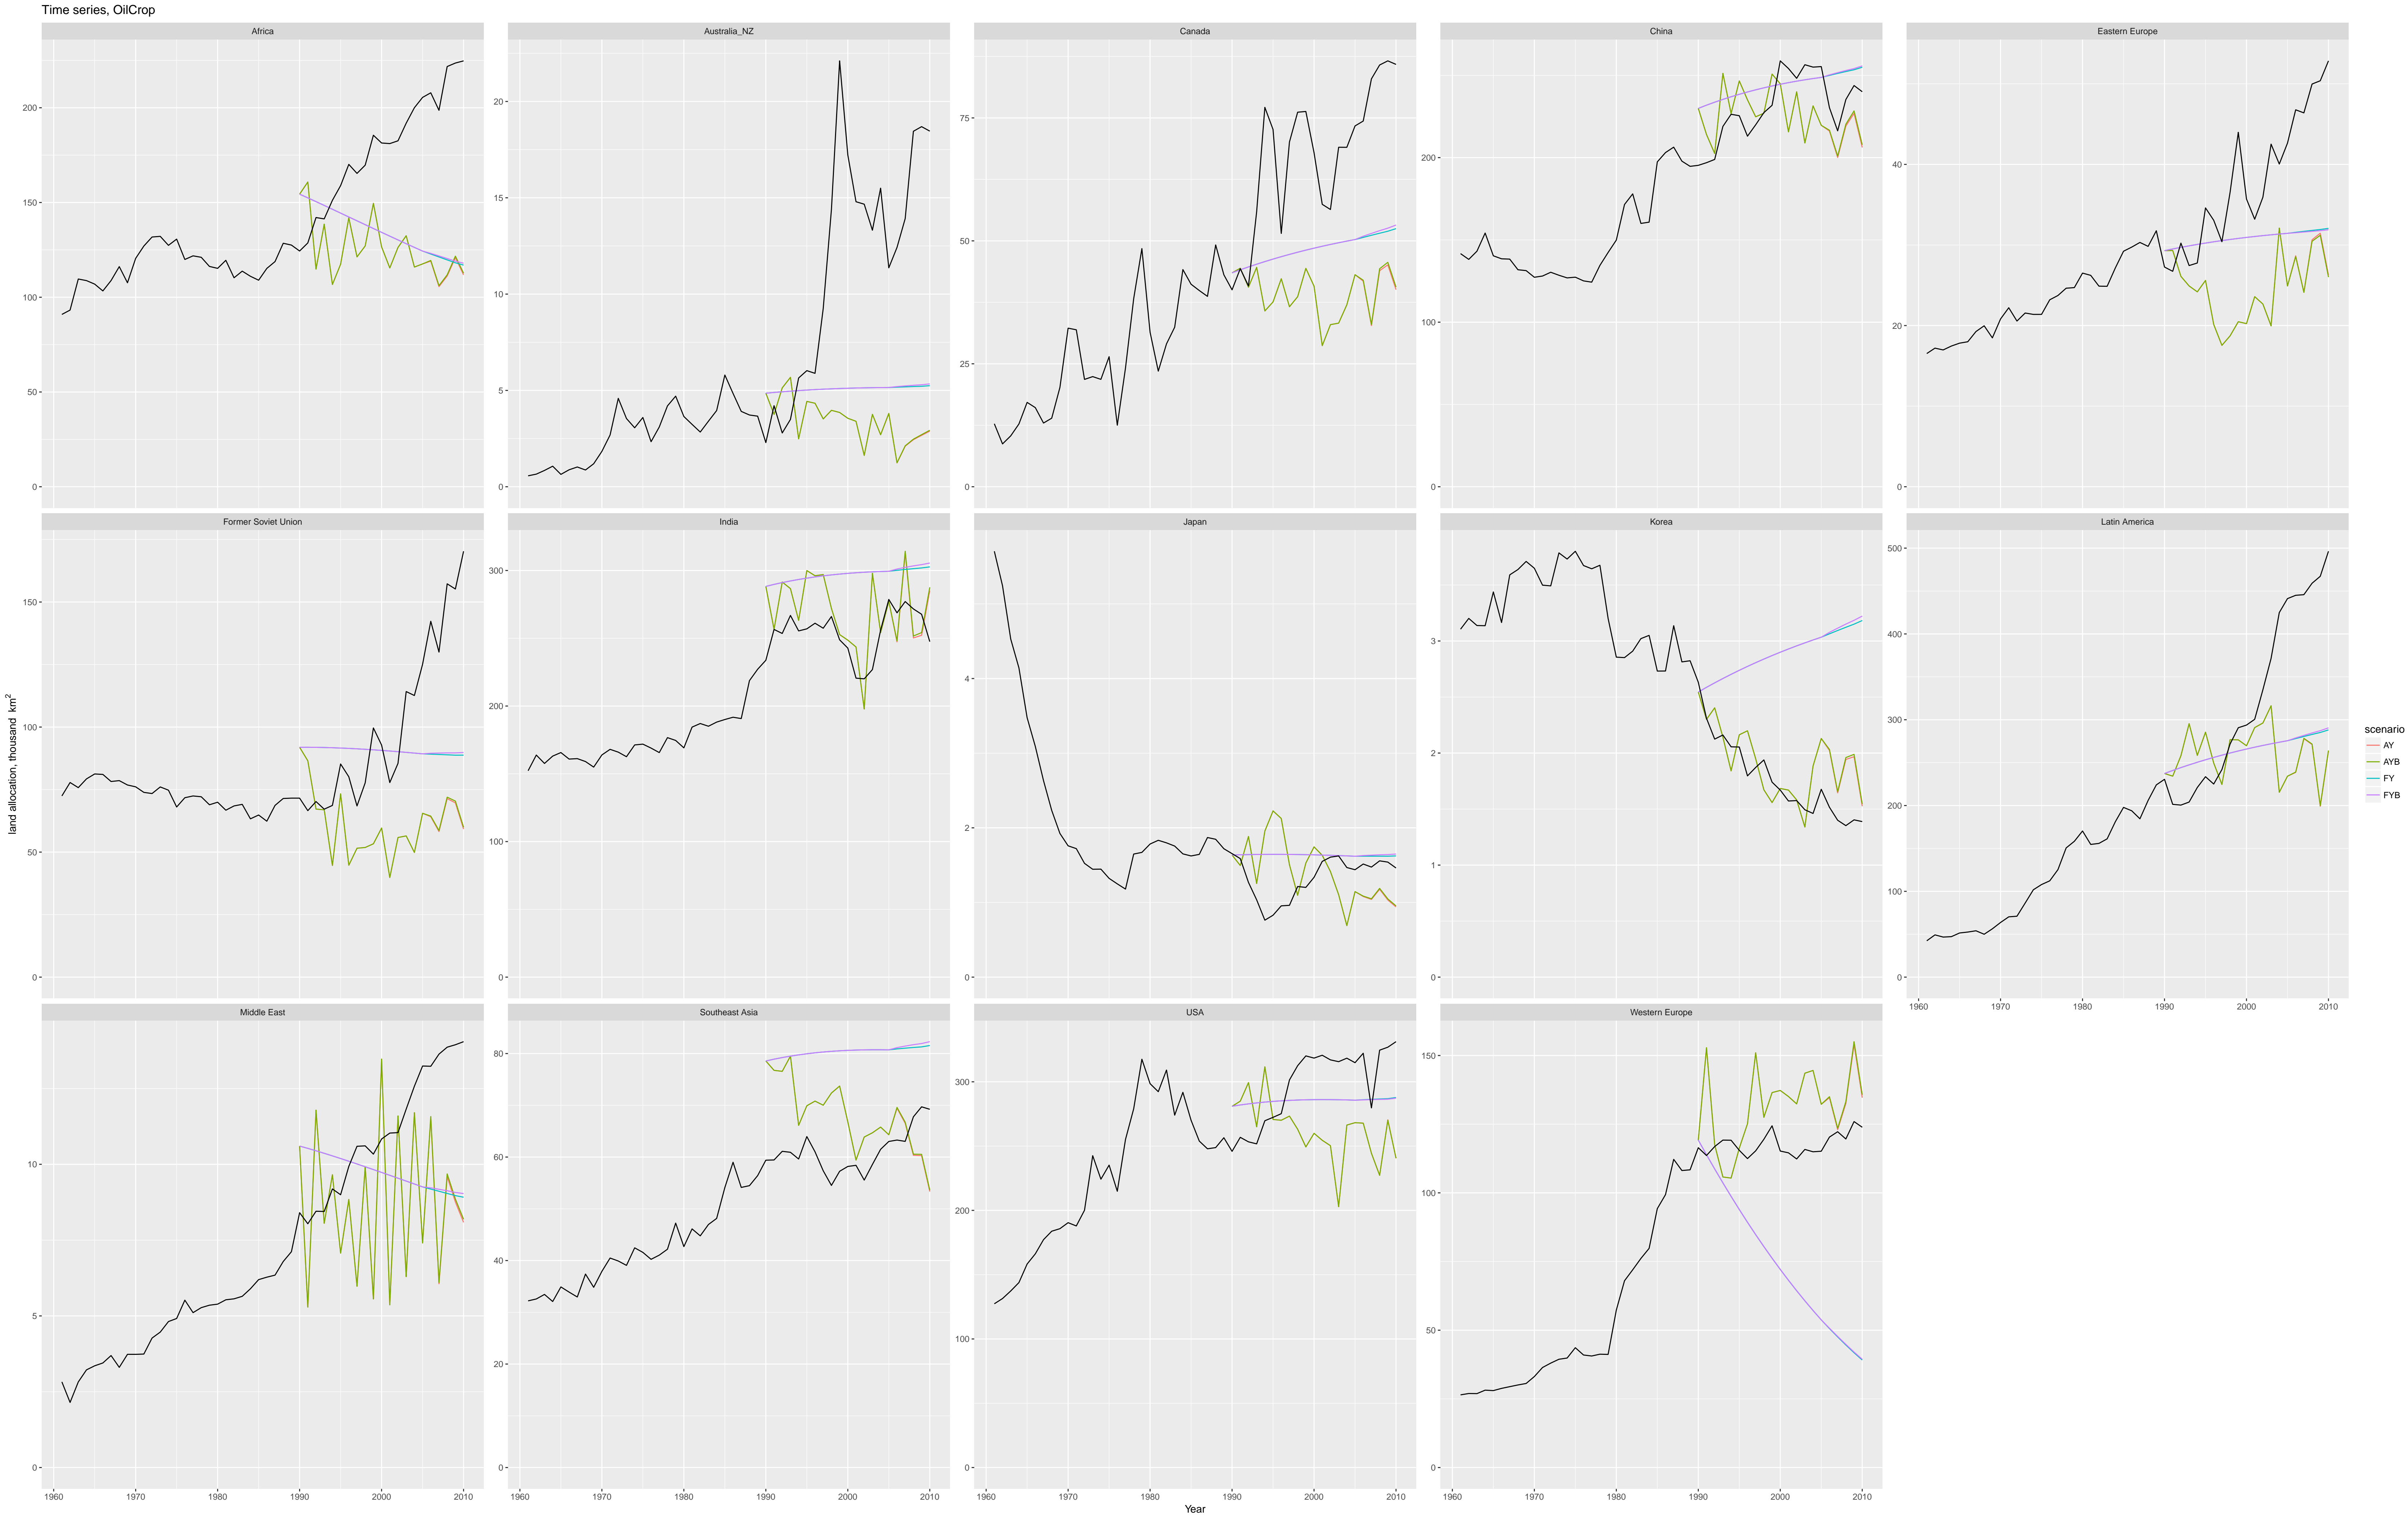

Supplement: Supplementary file 14 [file gmd-10-4307-2017-supplement.zip]

# Normalized RMSE, Wheat



scenario

- AY
- AYB
- FY
- FYB

Supplement: Supplementary file 15 [file gmd-10-4307-2017-supplement.zip]

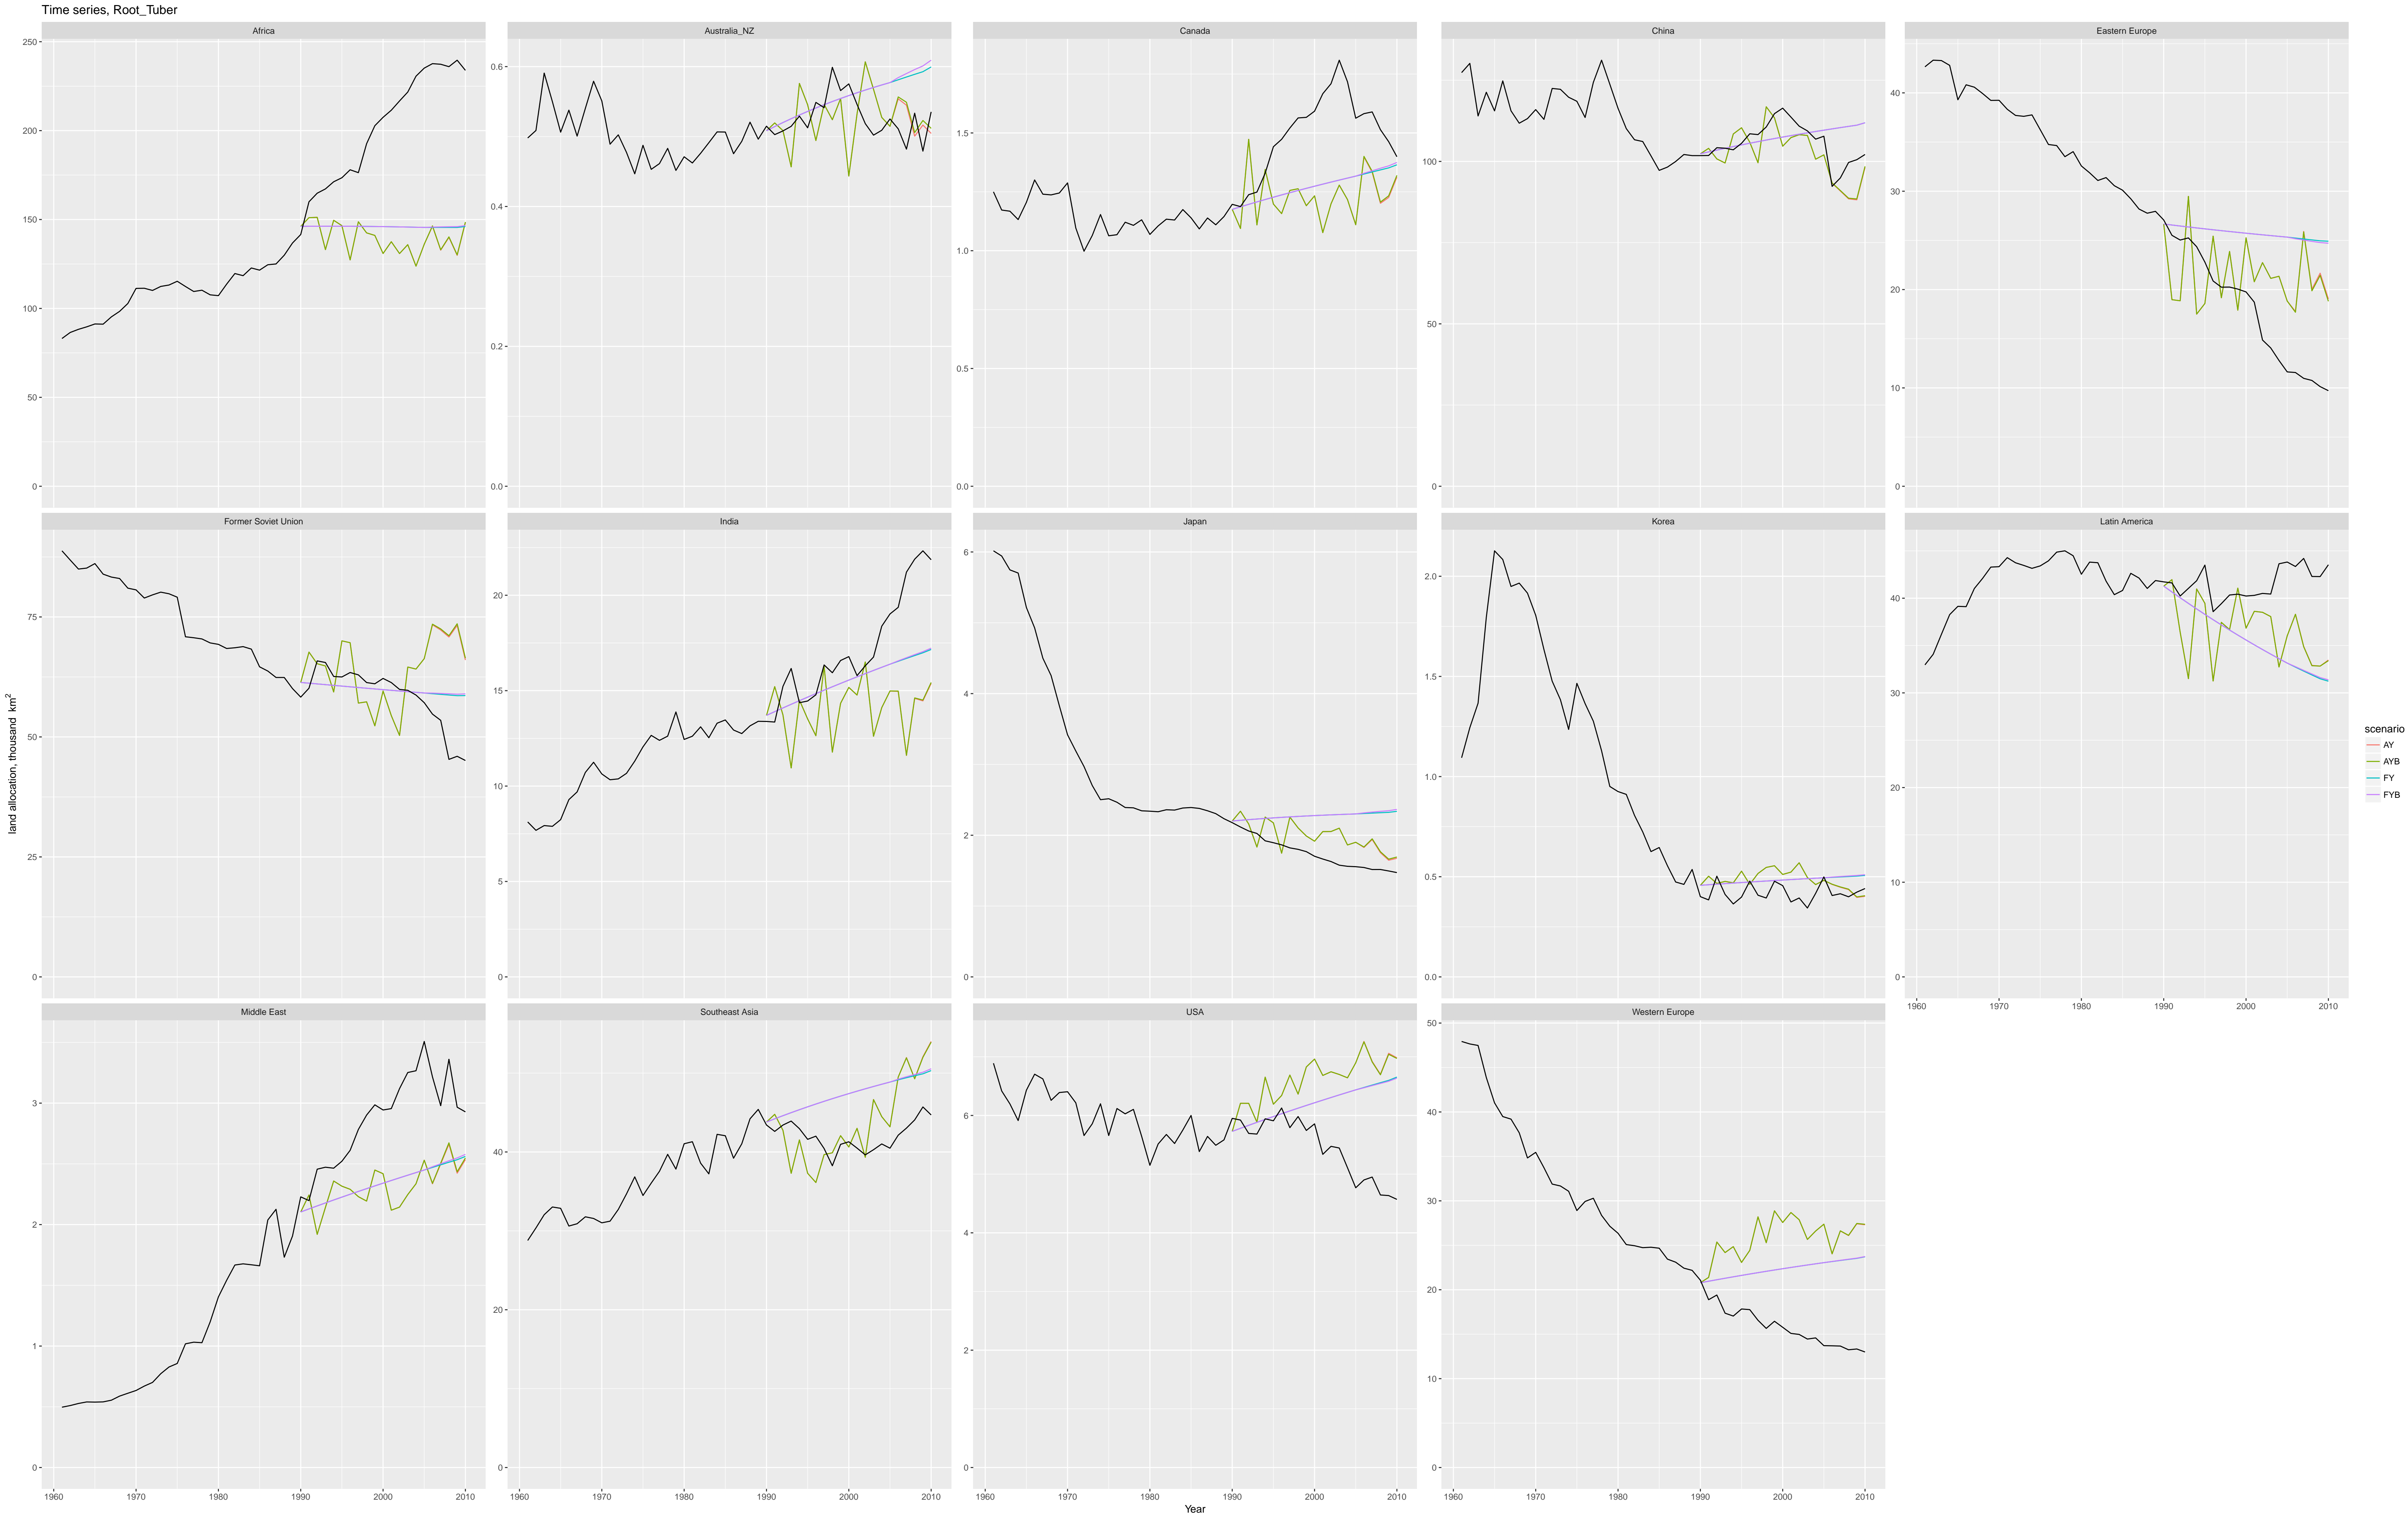

Supplement: Supplementary file 16 [file gmd-10-4307-2017-supplement.zip]

Revised normalized RMSE, USA

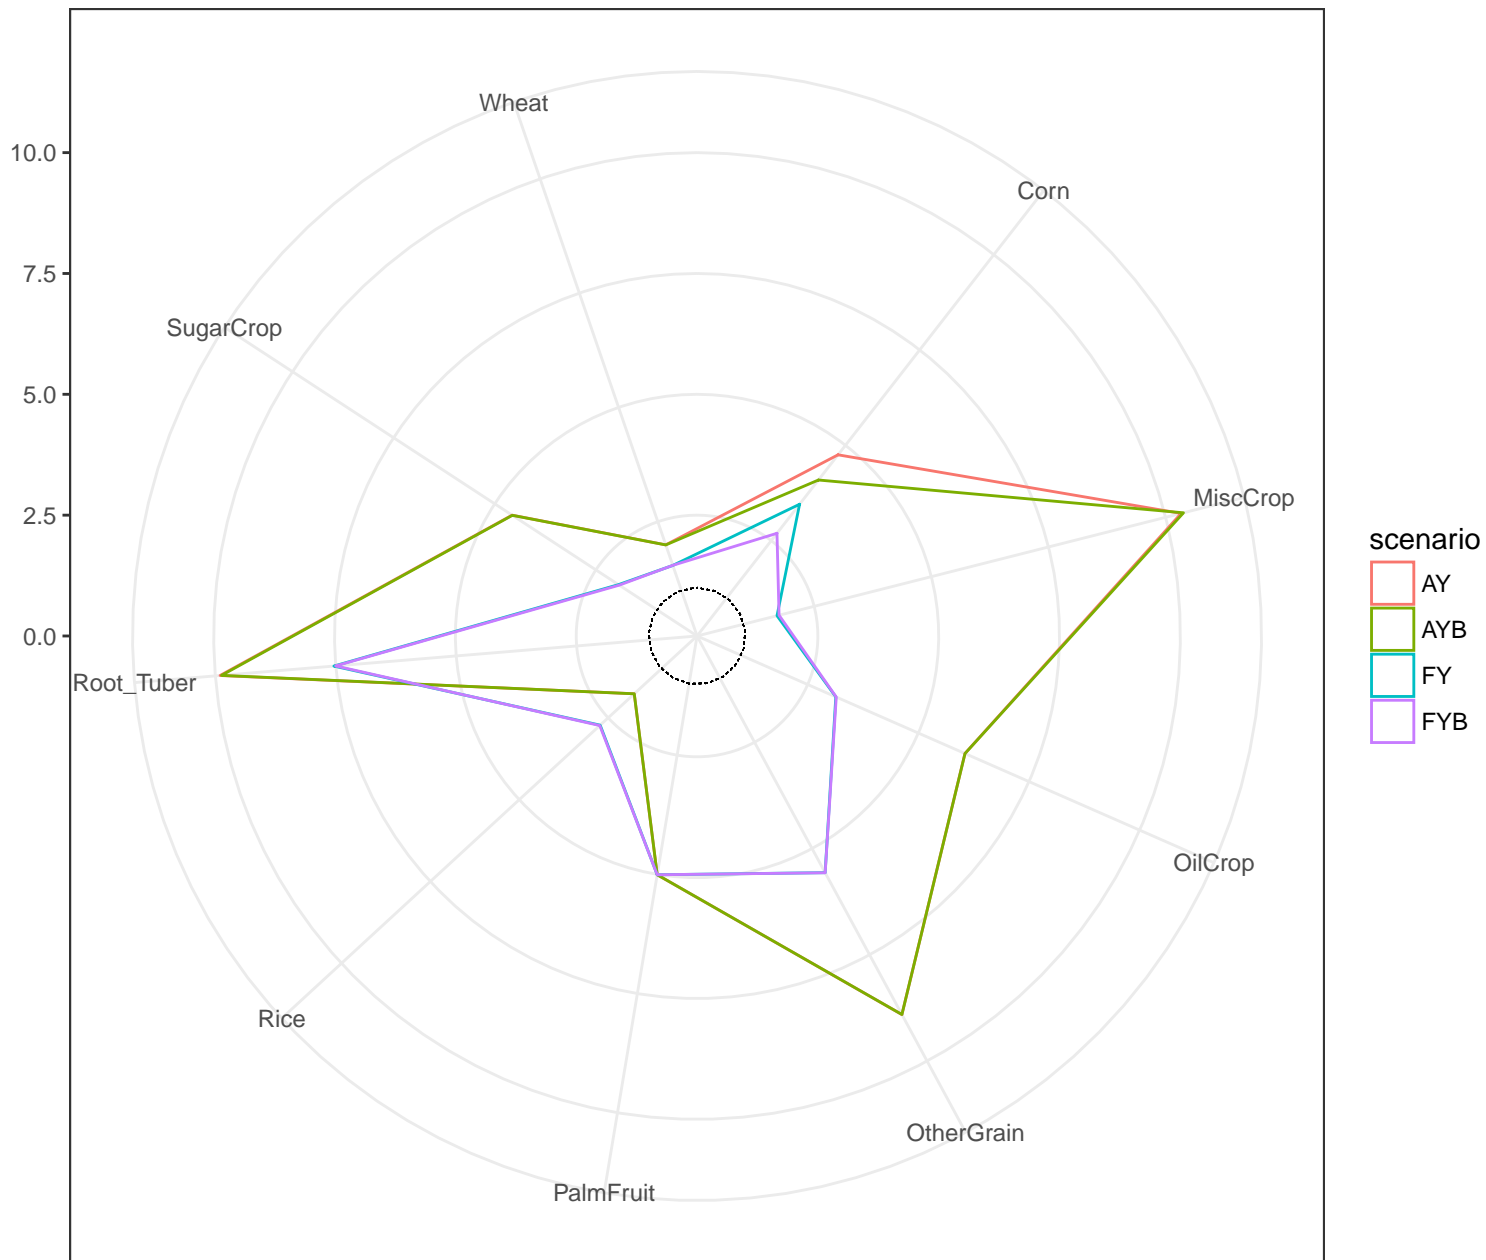

Supplement: Supplementary file 17 [file gmd-10-4307-2017-supplement.zip]

Normalized centered RMSE, USA

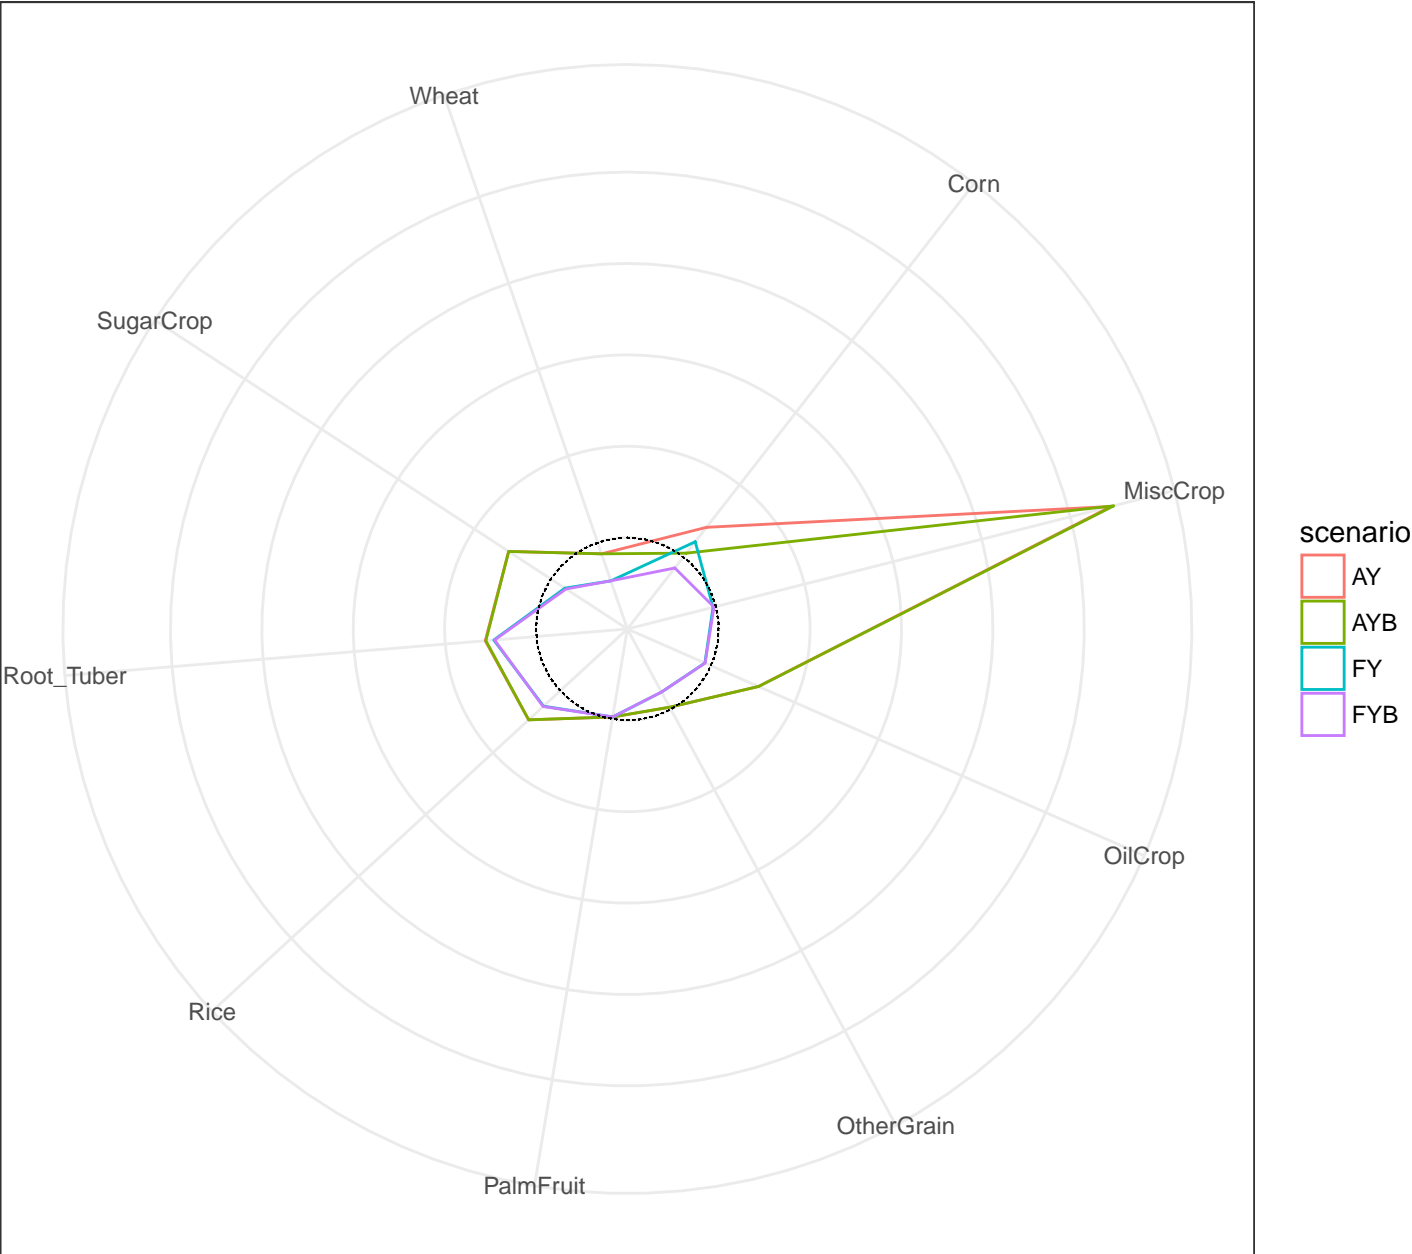

Supplement: Supplementary file 18 [file gmd-10-4307-2017-supplement.zip]

Normalized RMSE, all regions for each crop

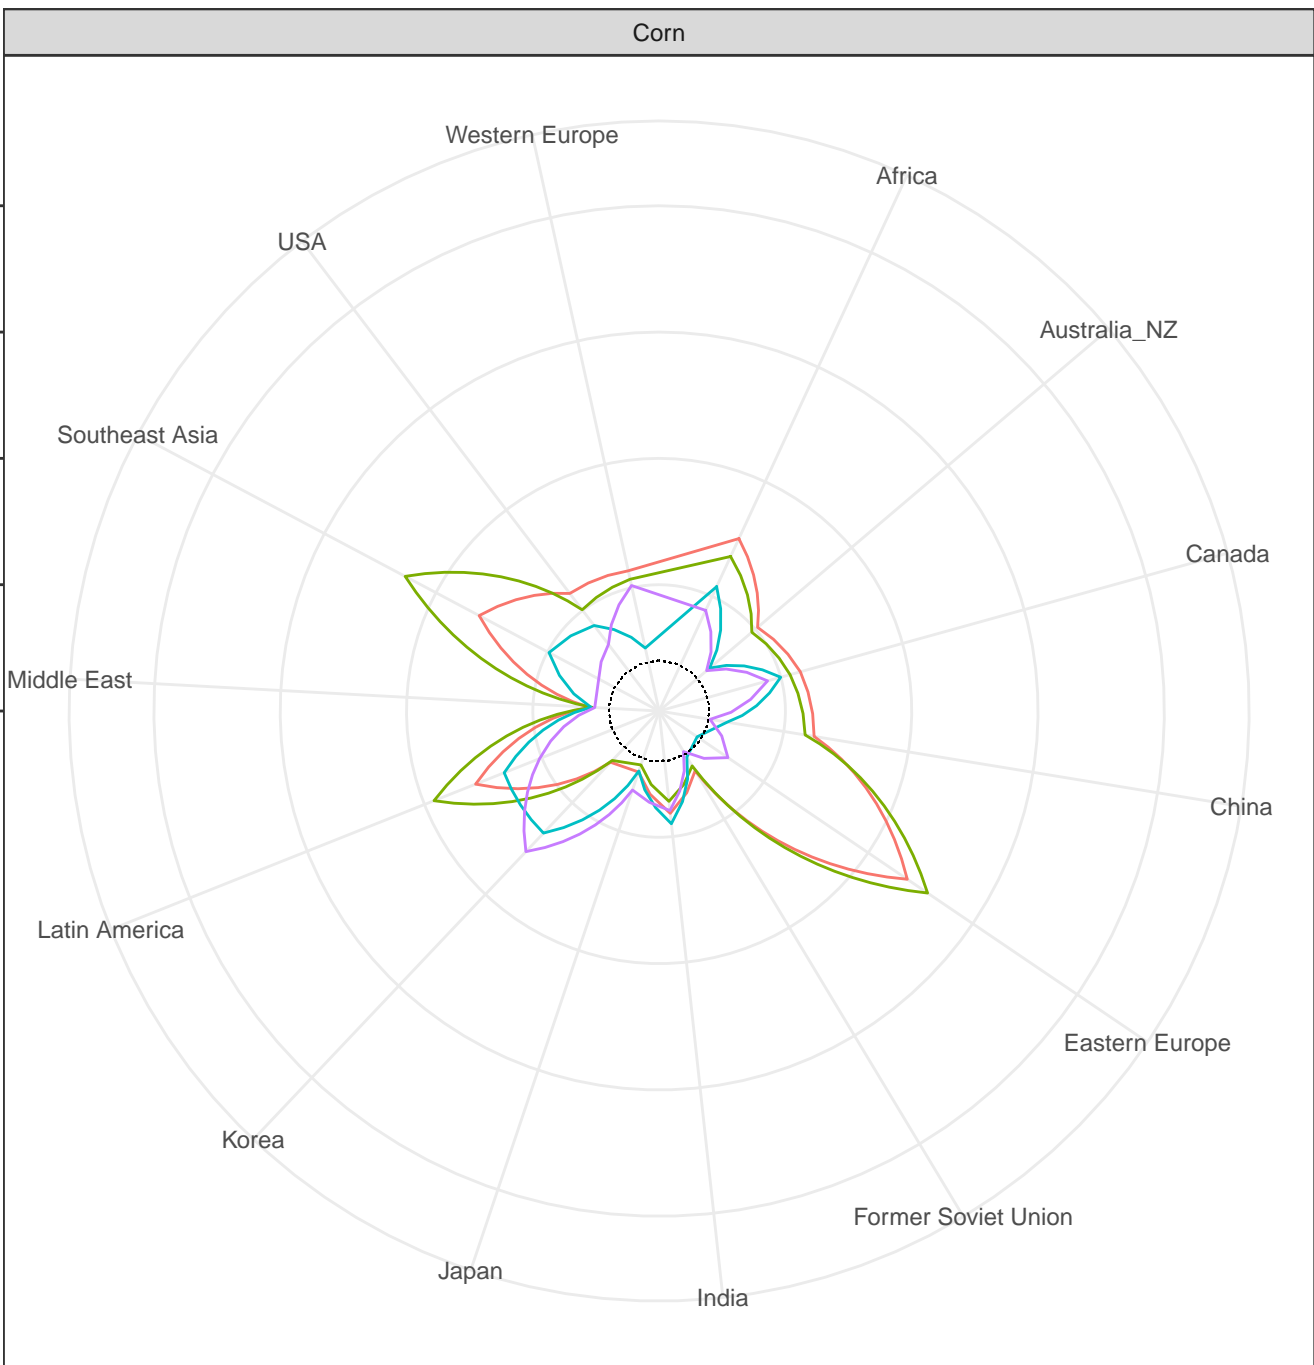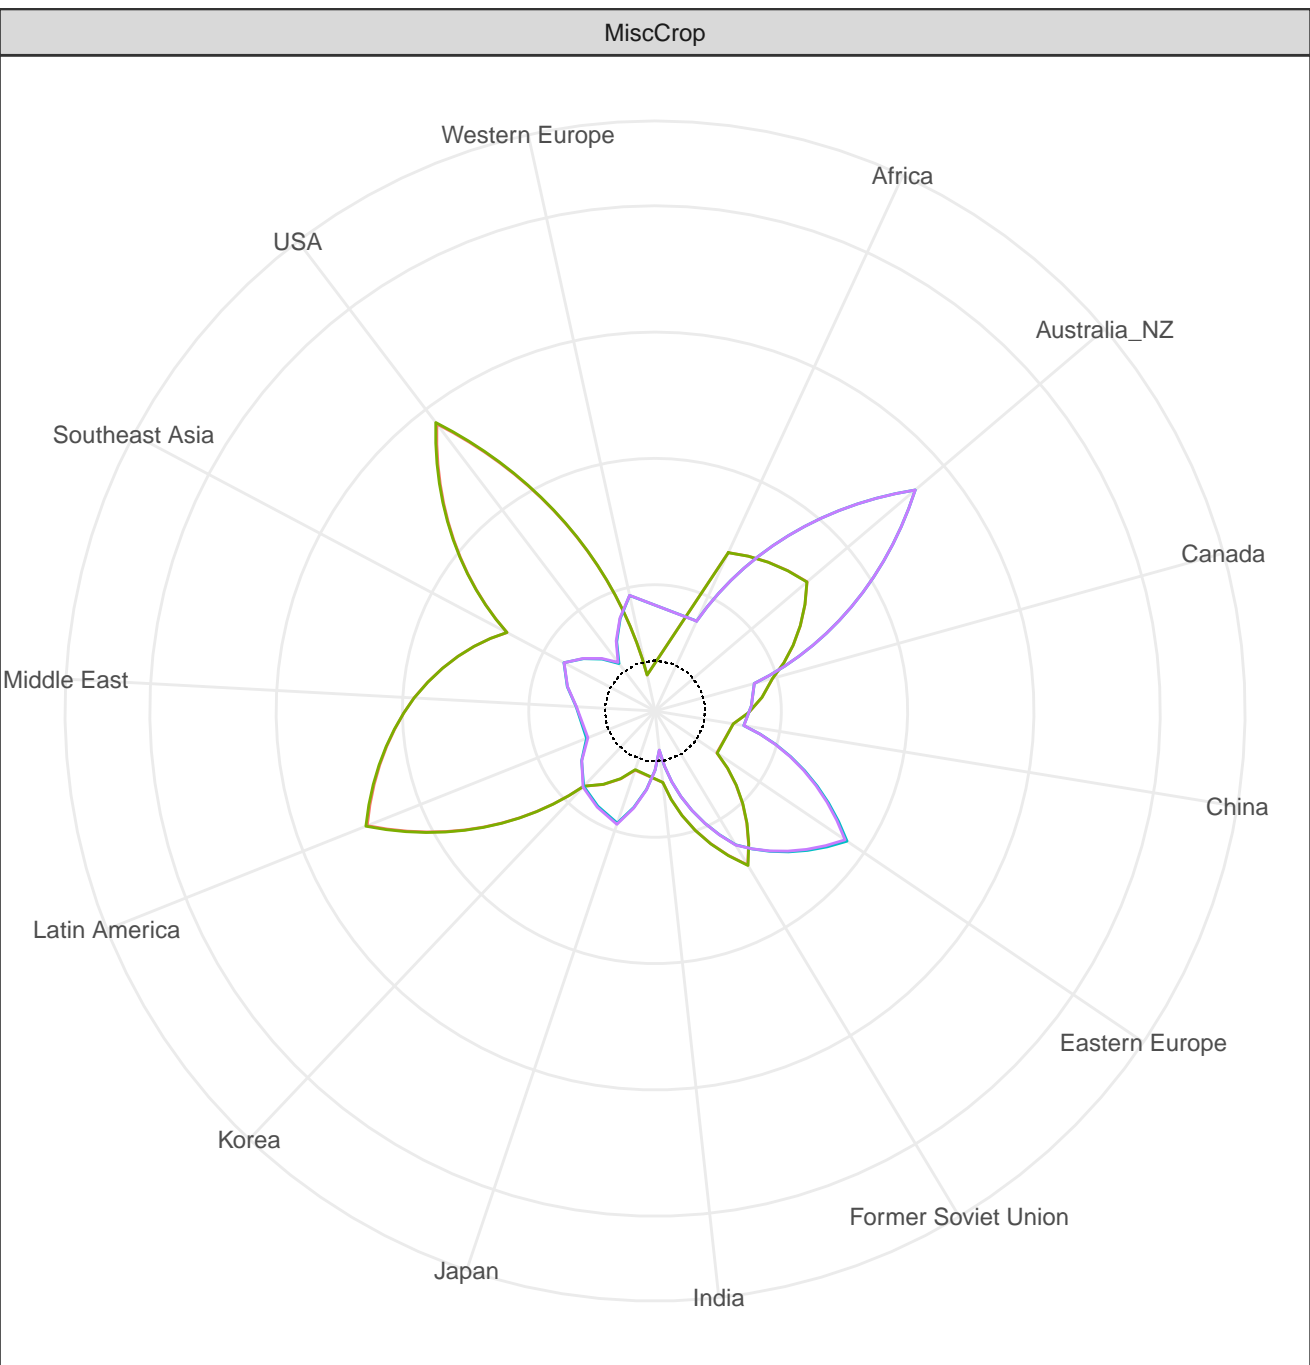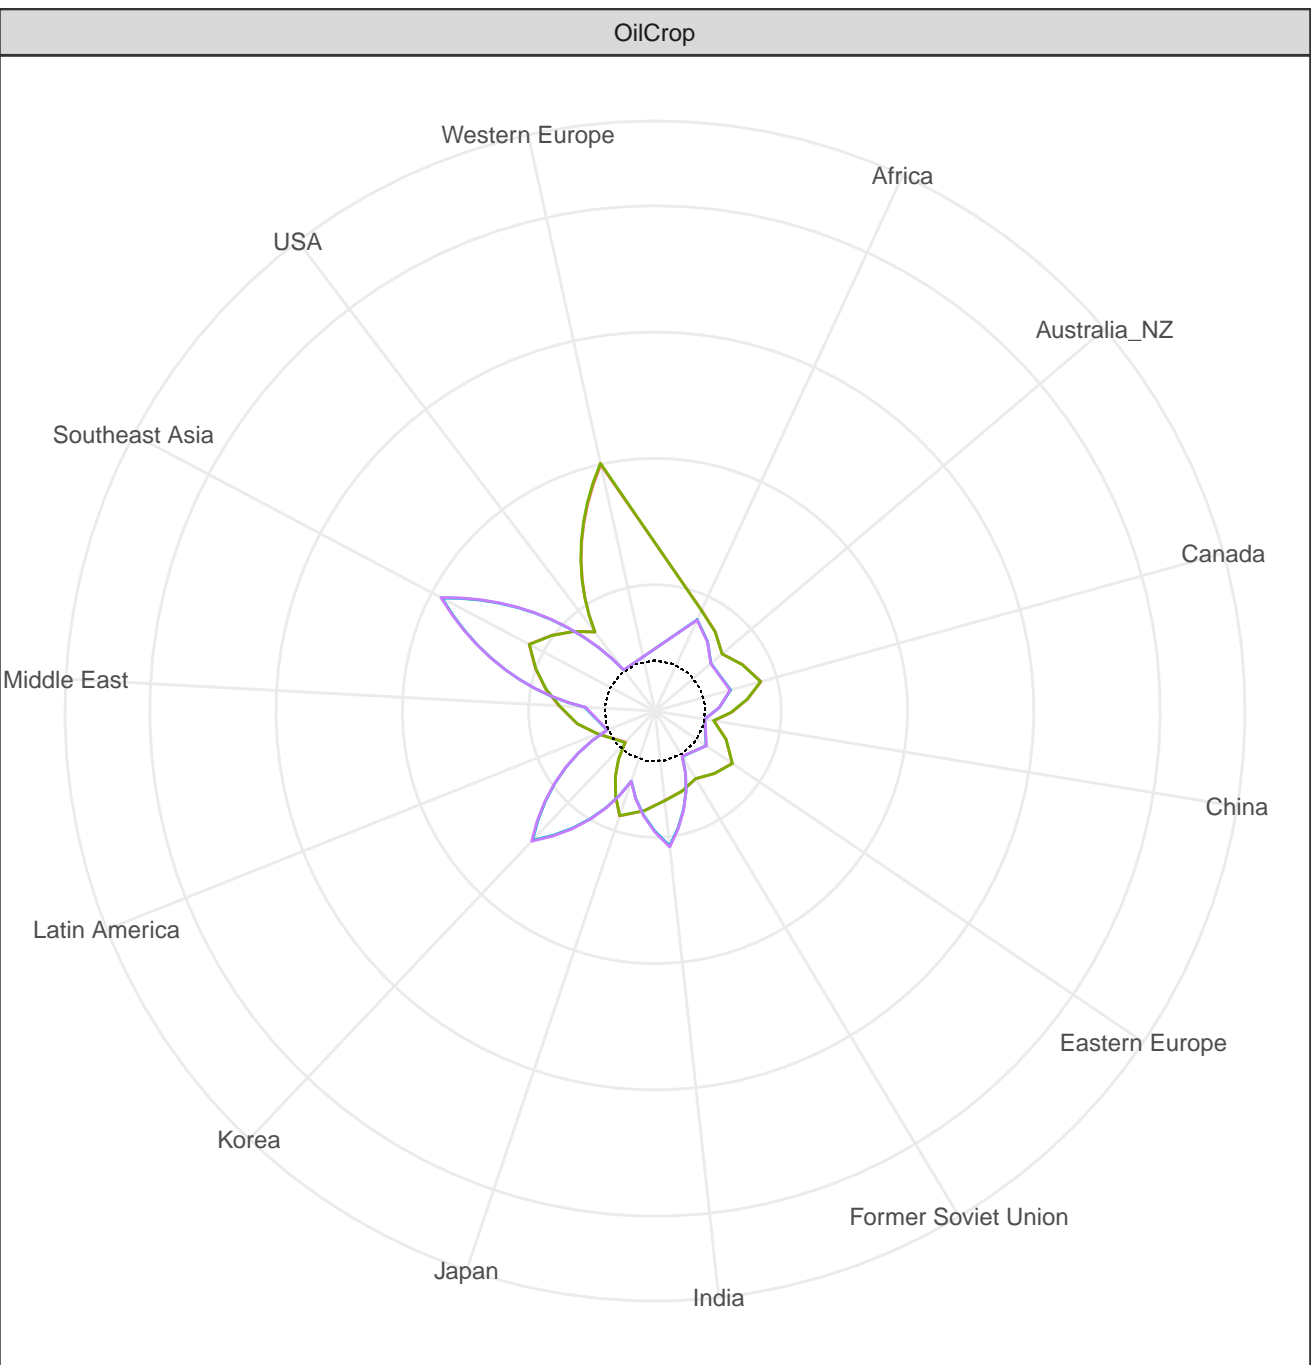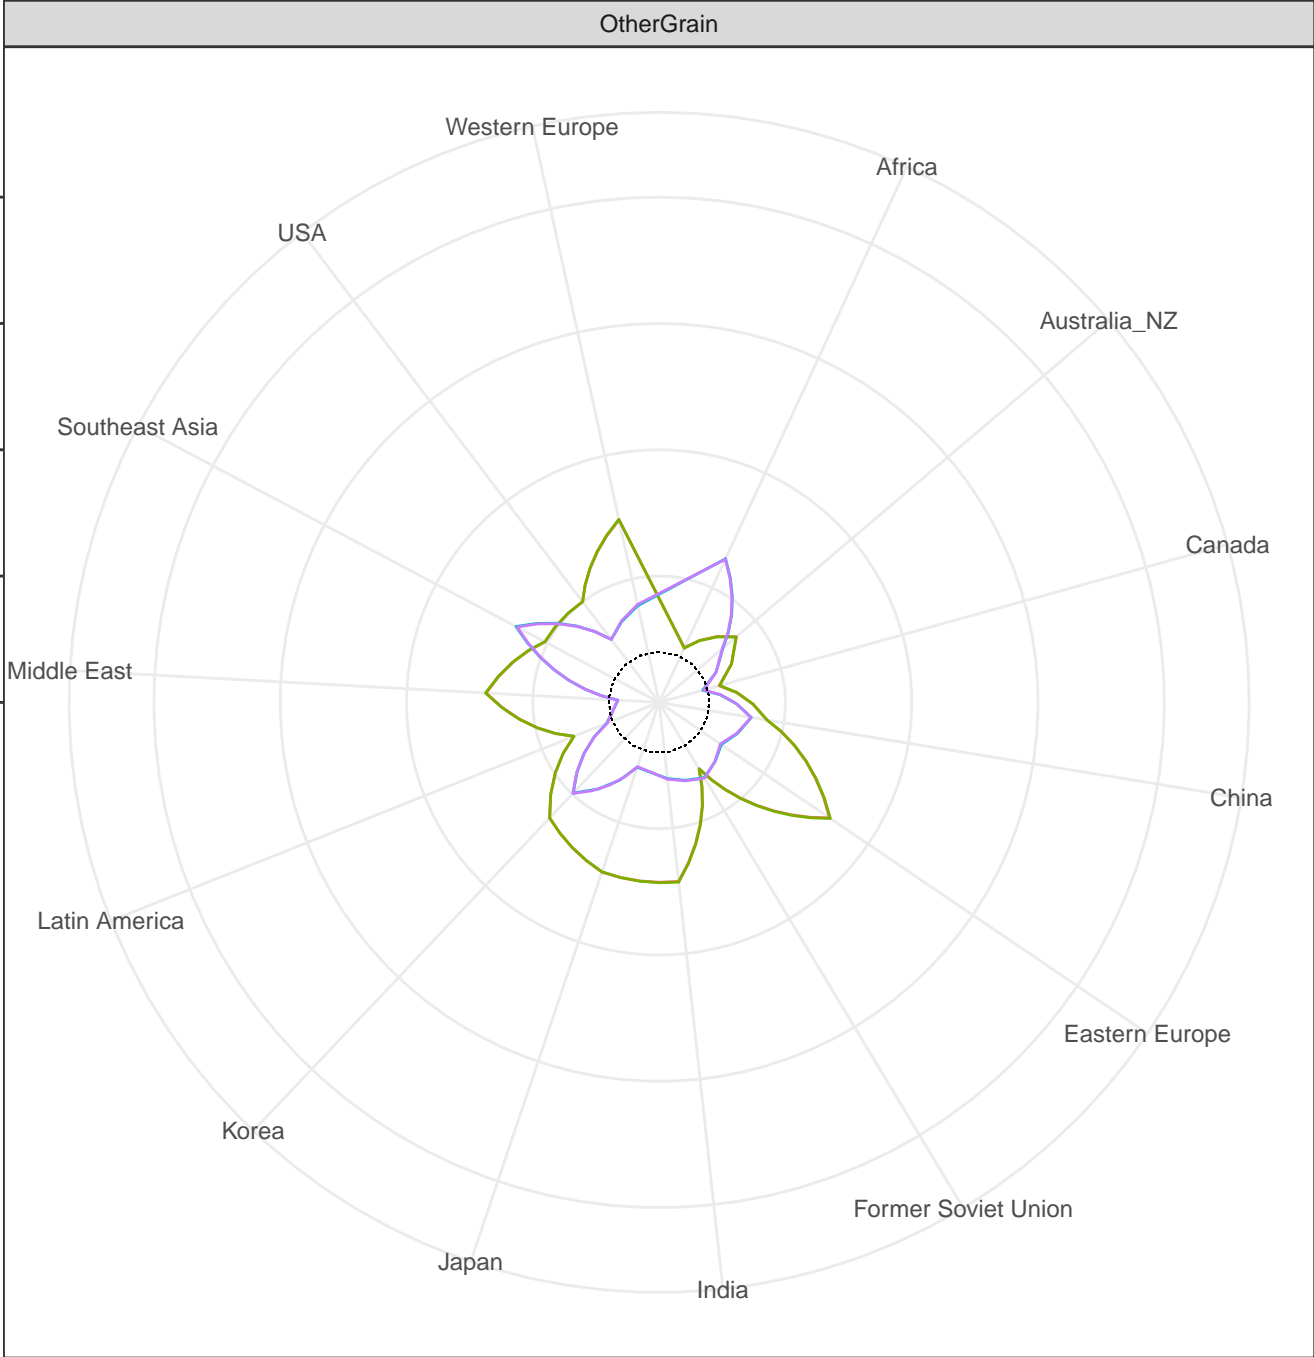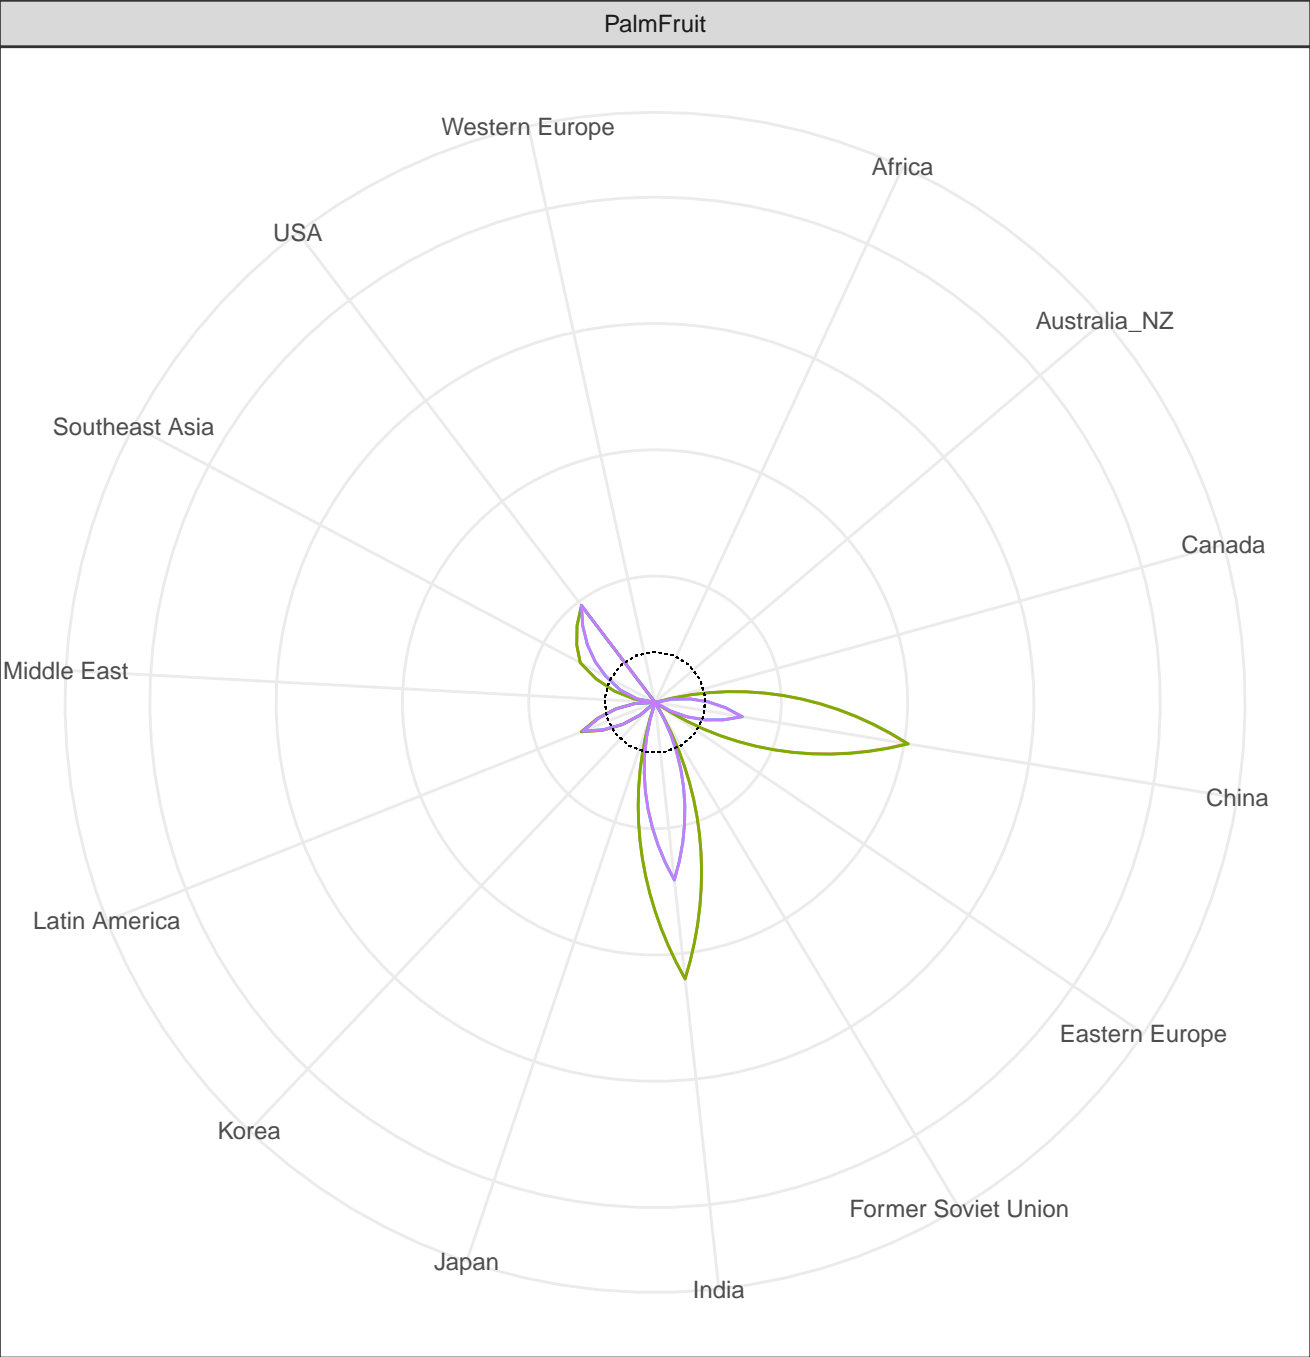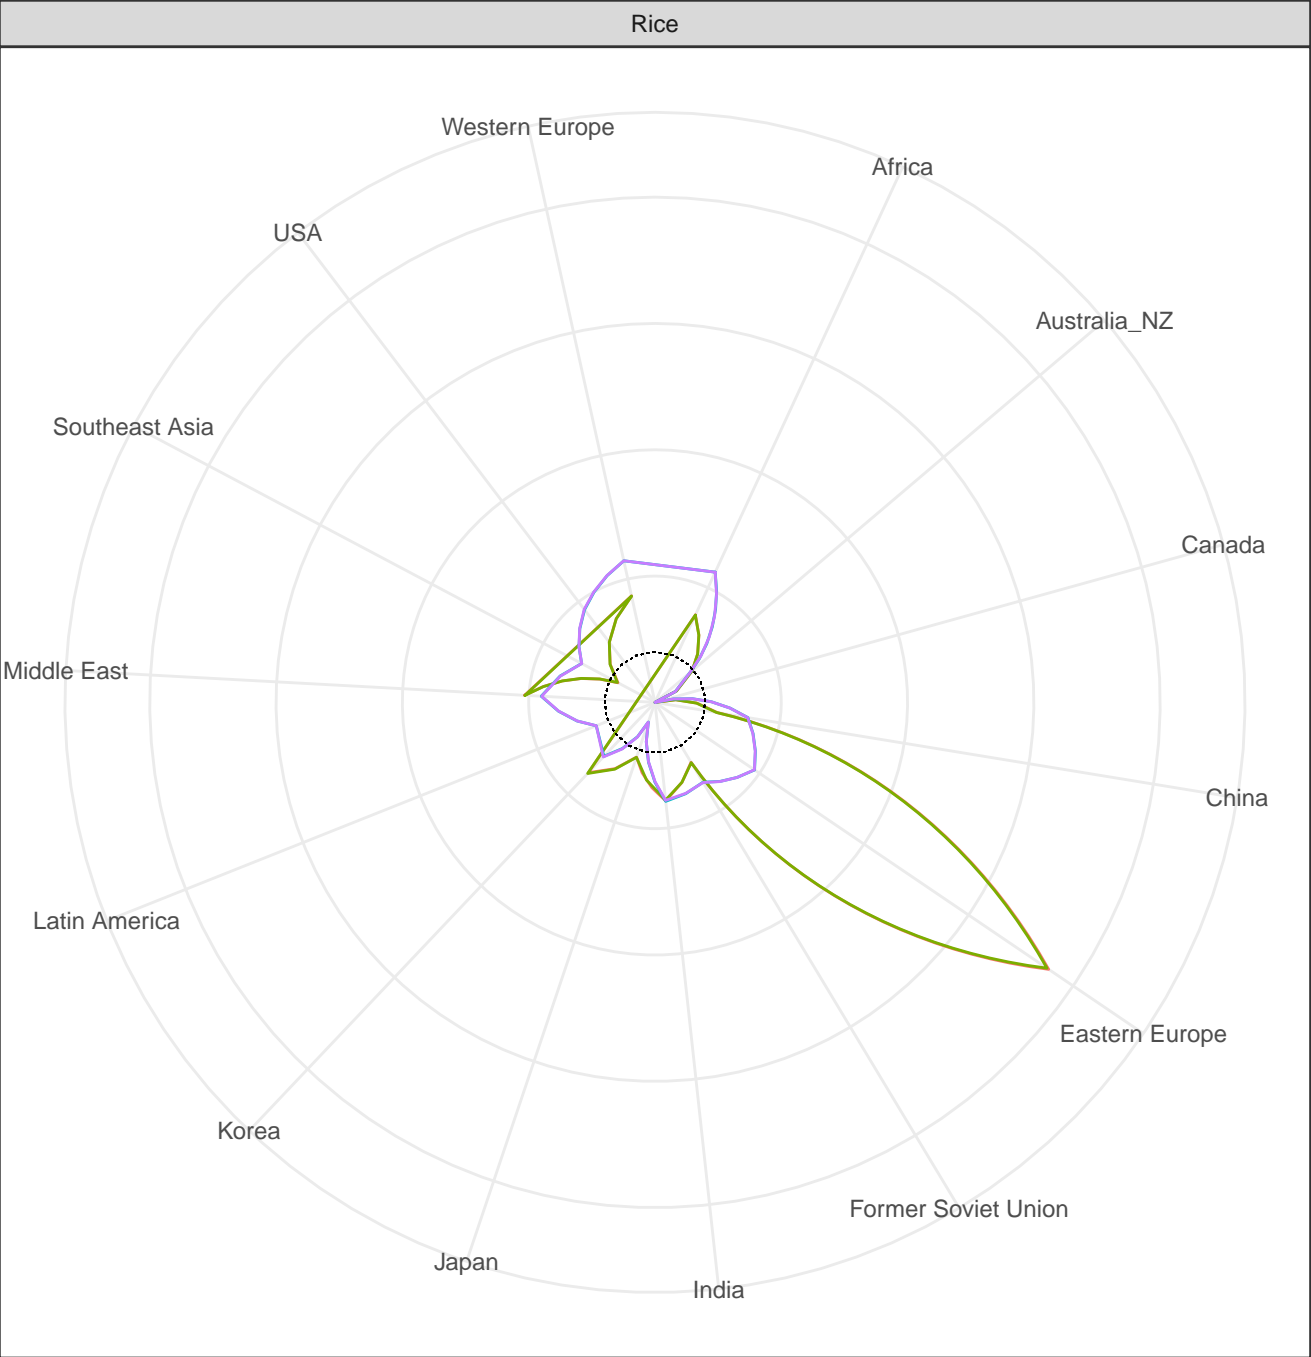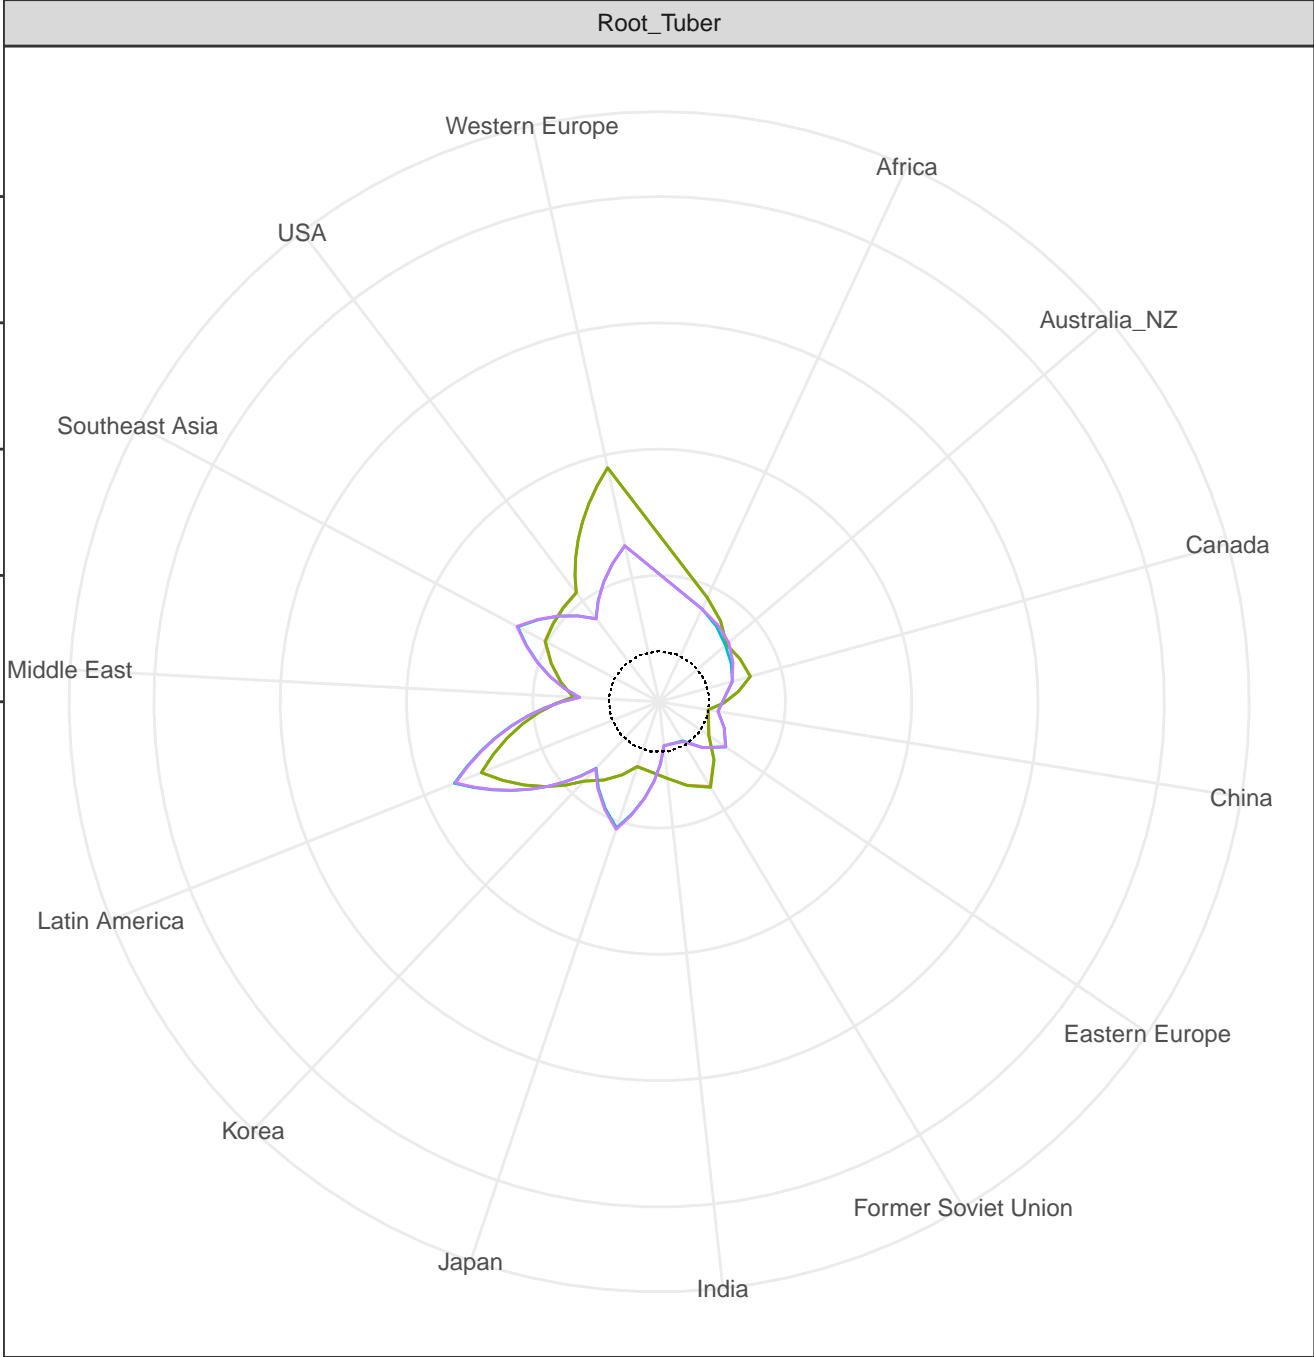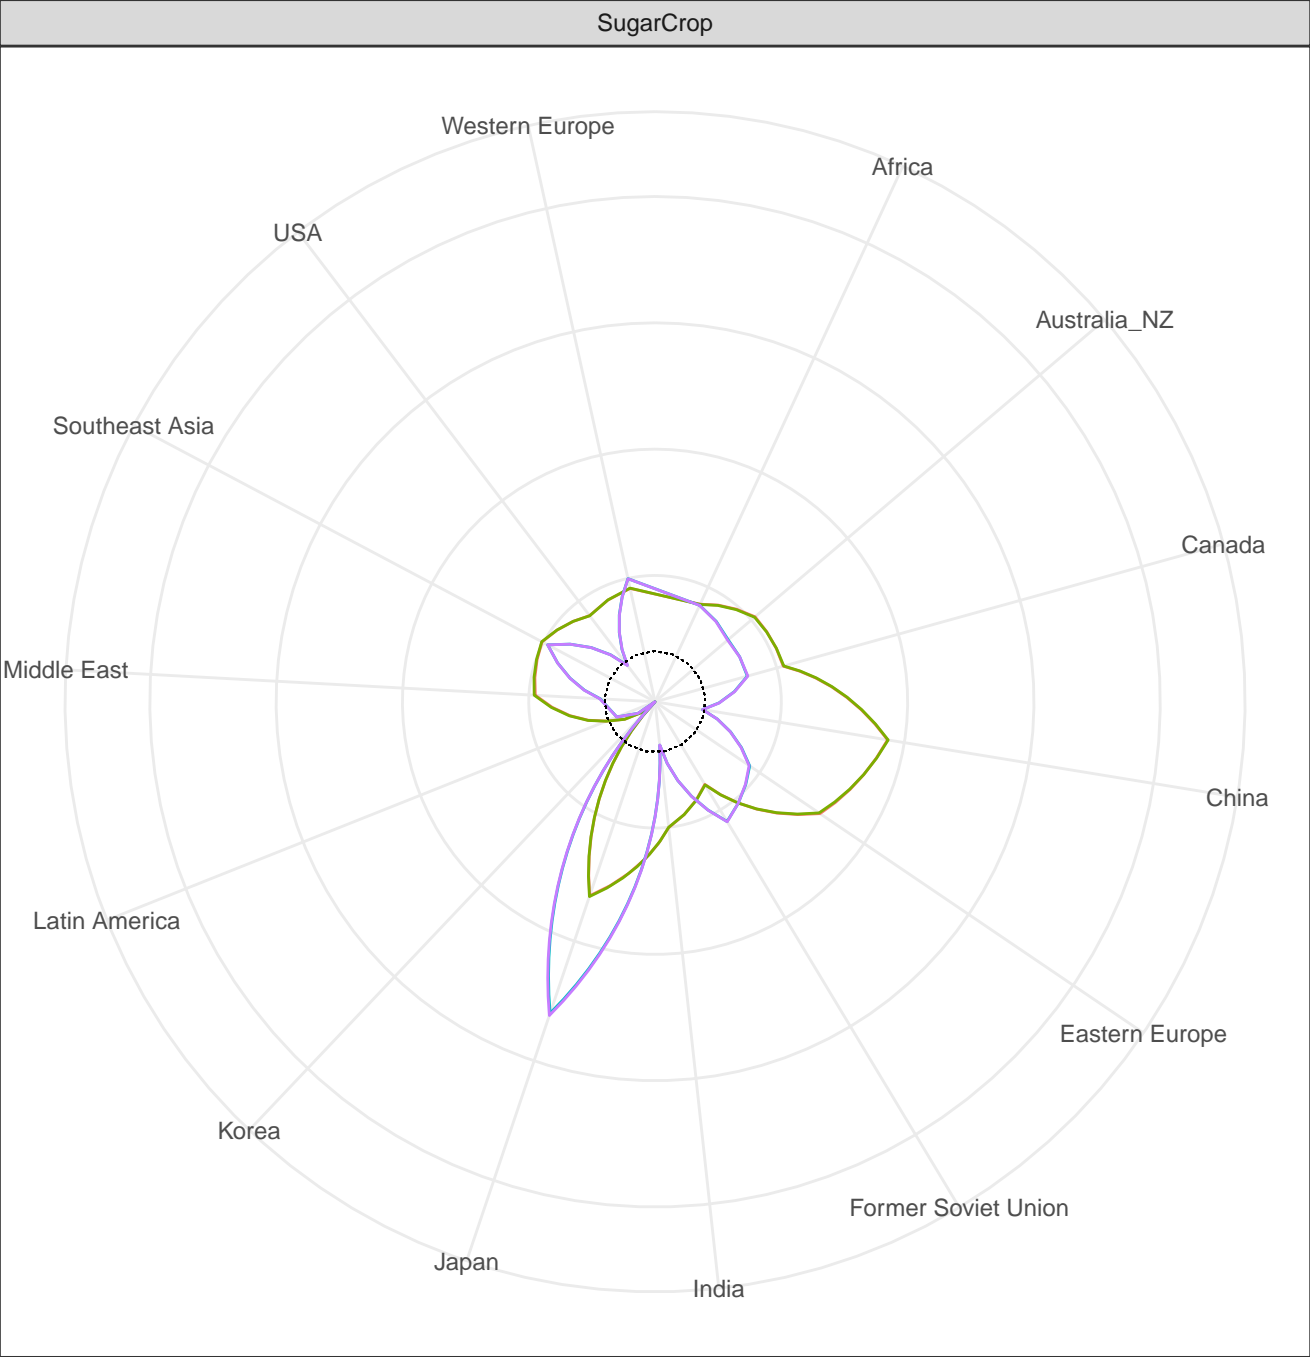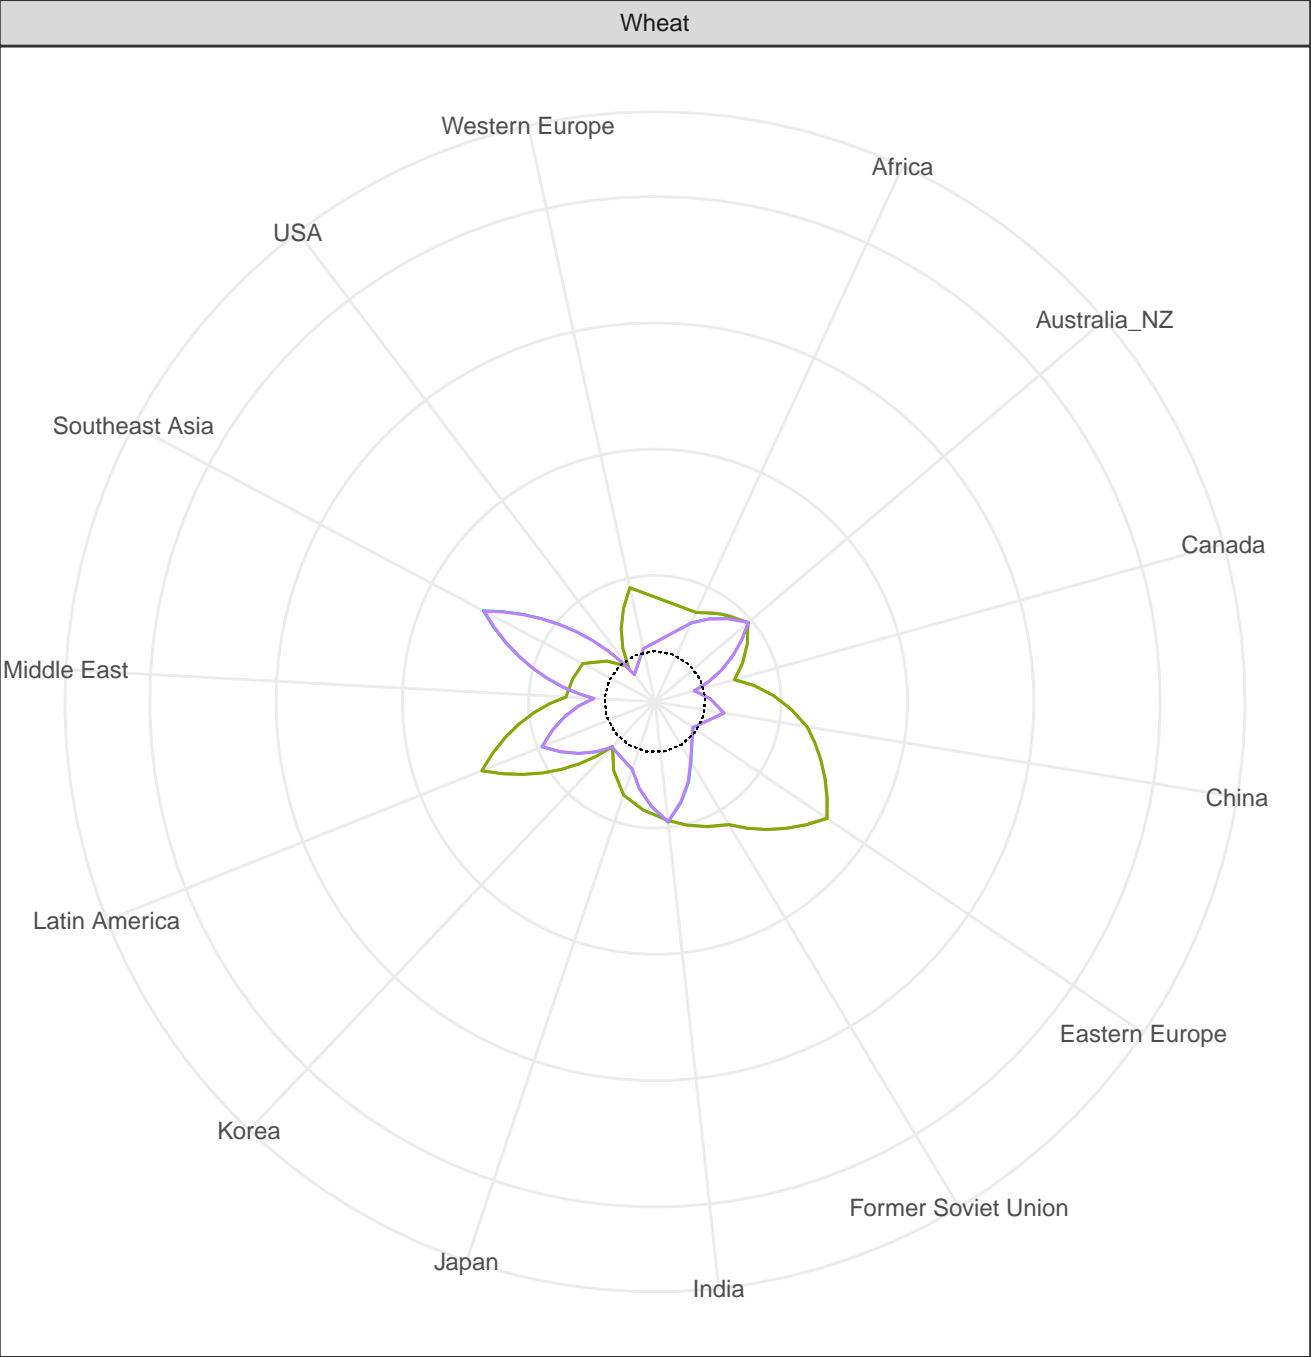

scenario

- AY
- AYB
- FY
- FYB

Supplement: Supplementary file 19 [file gmd-10-4307-2017-supplement.zip]

Revised normalized RMSE, all crops in each region

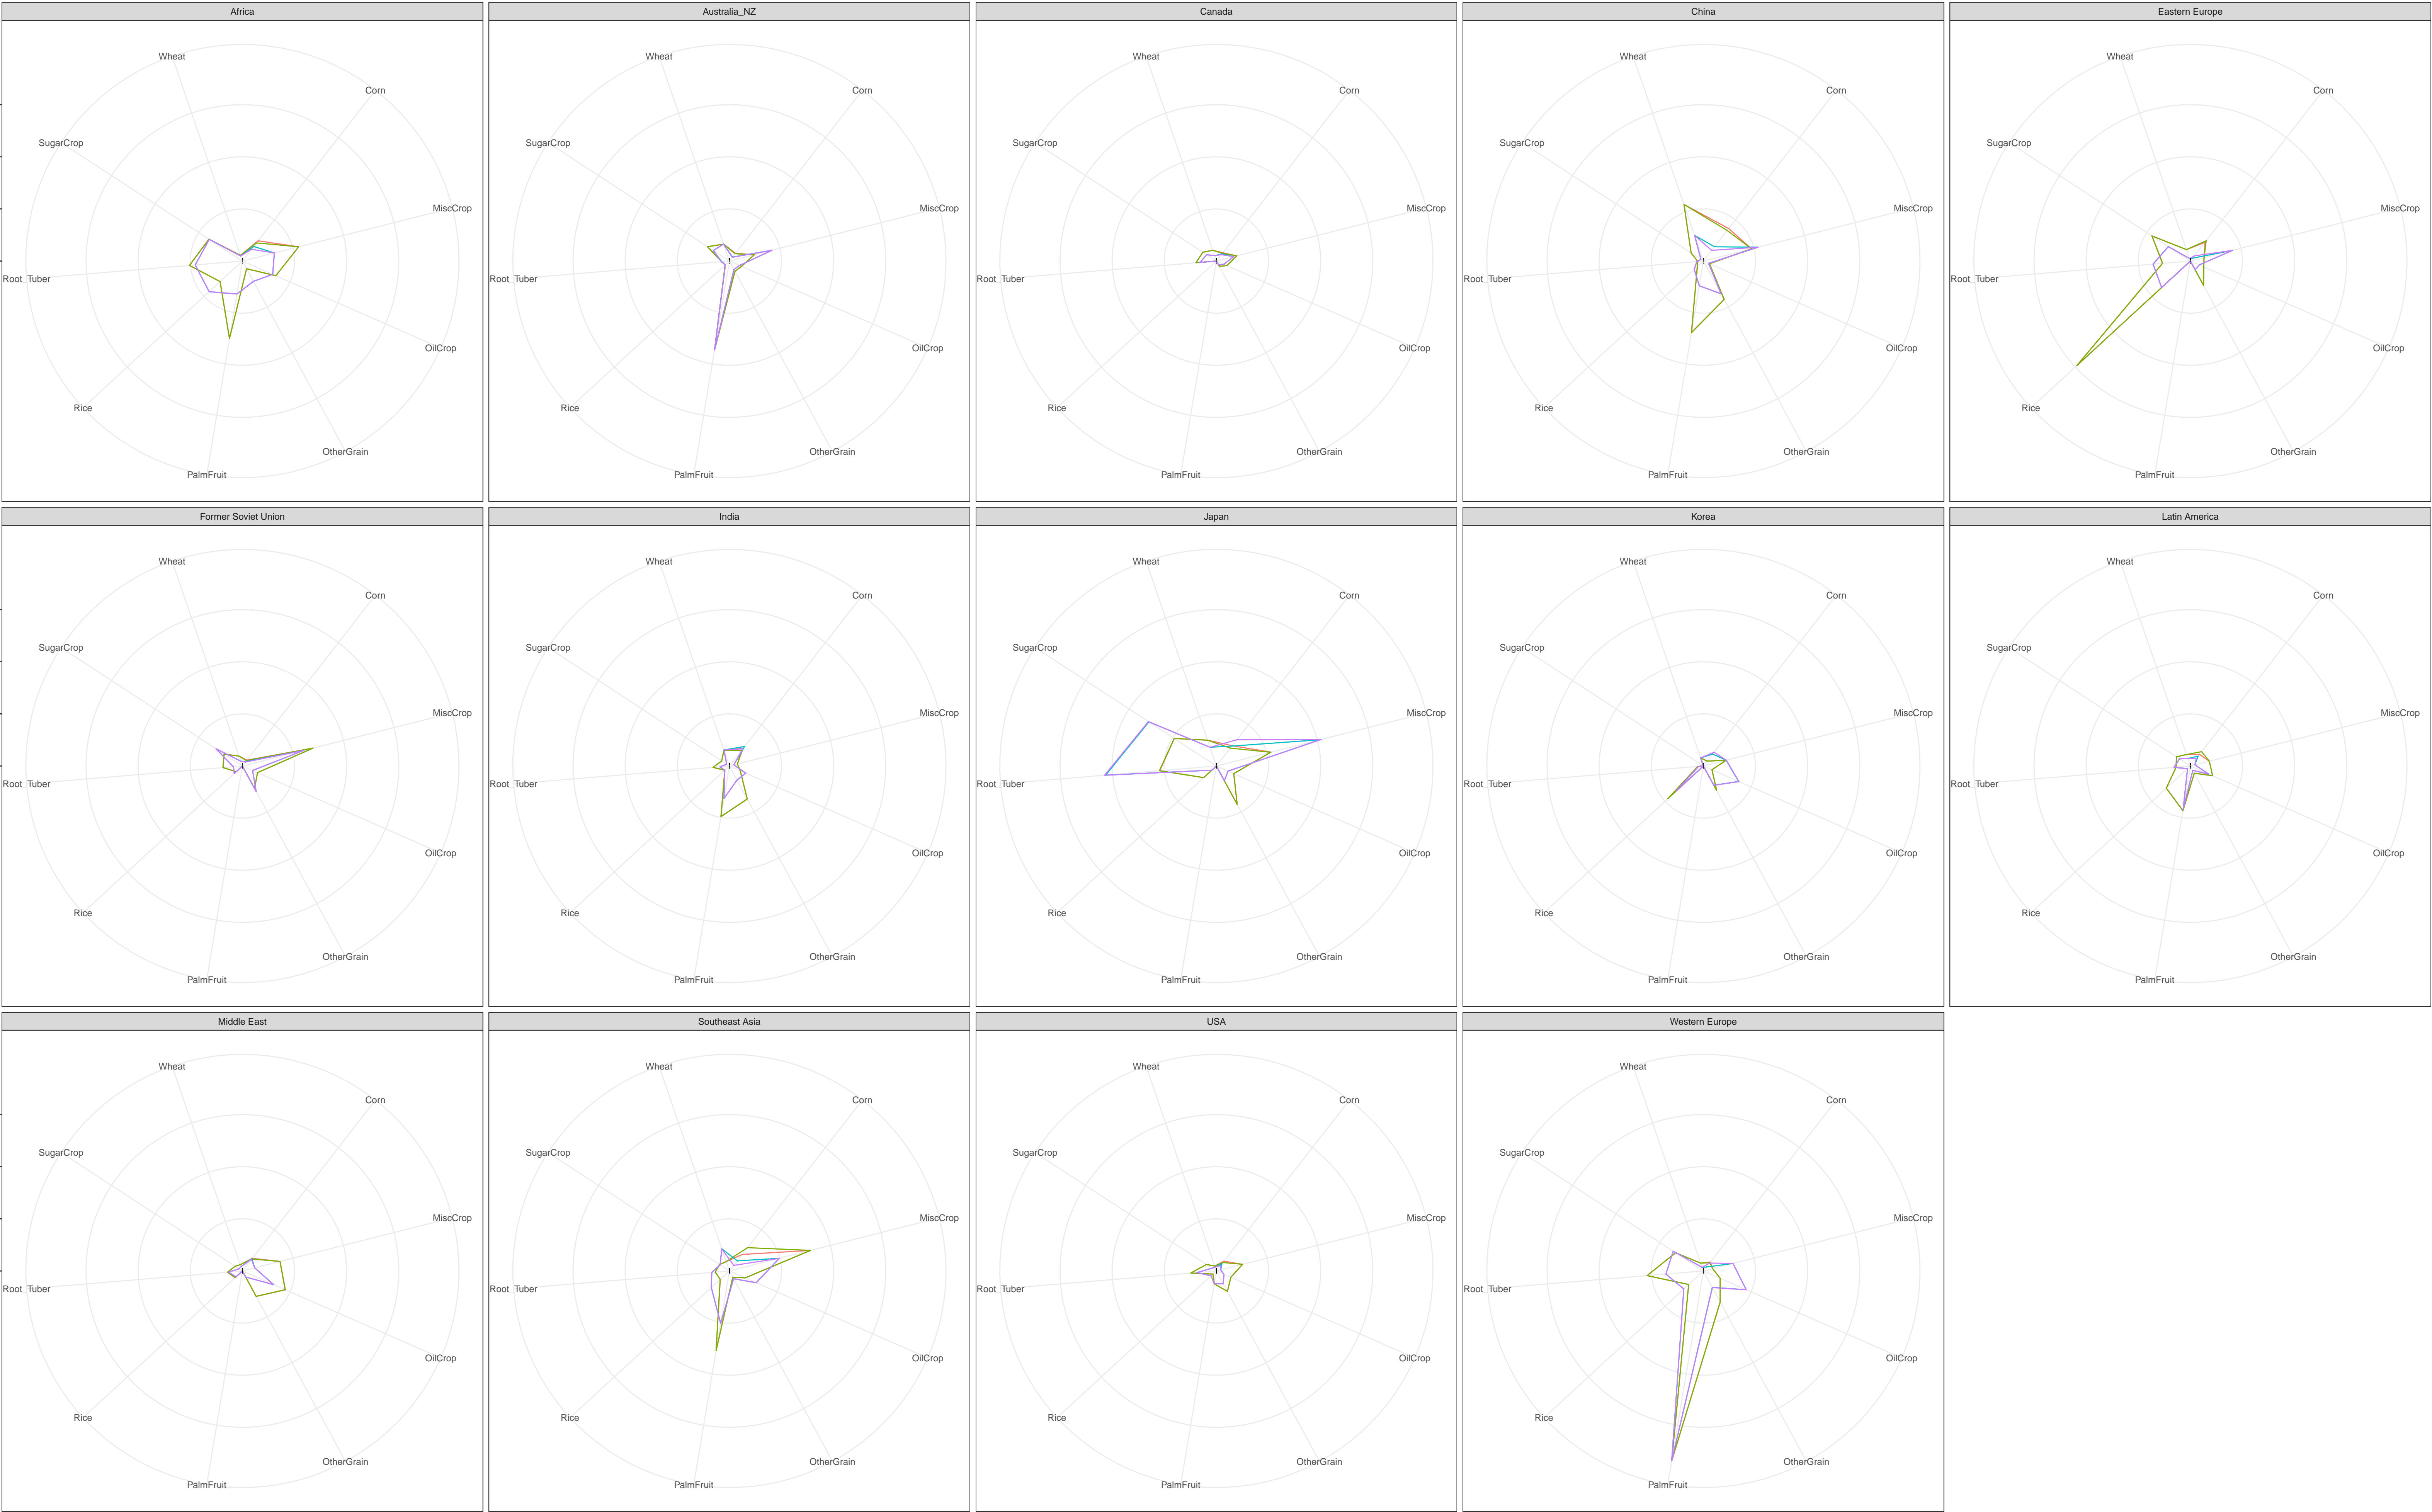

scenario  
AY  
AYB  
FY  
FYB

Supplement: Supplementary file 20 [file gmd-10-4307-2017-supplement.zip]

Revised normalized RMSE, USA



Supplement: Supplementary file 21 [file gmd-10-4307-2017-supplement.zip]

Time series, Corn

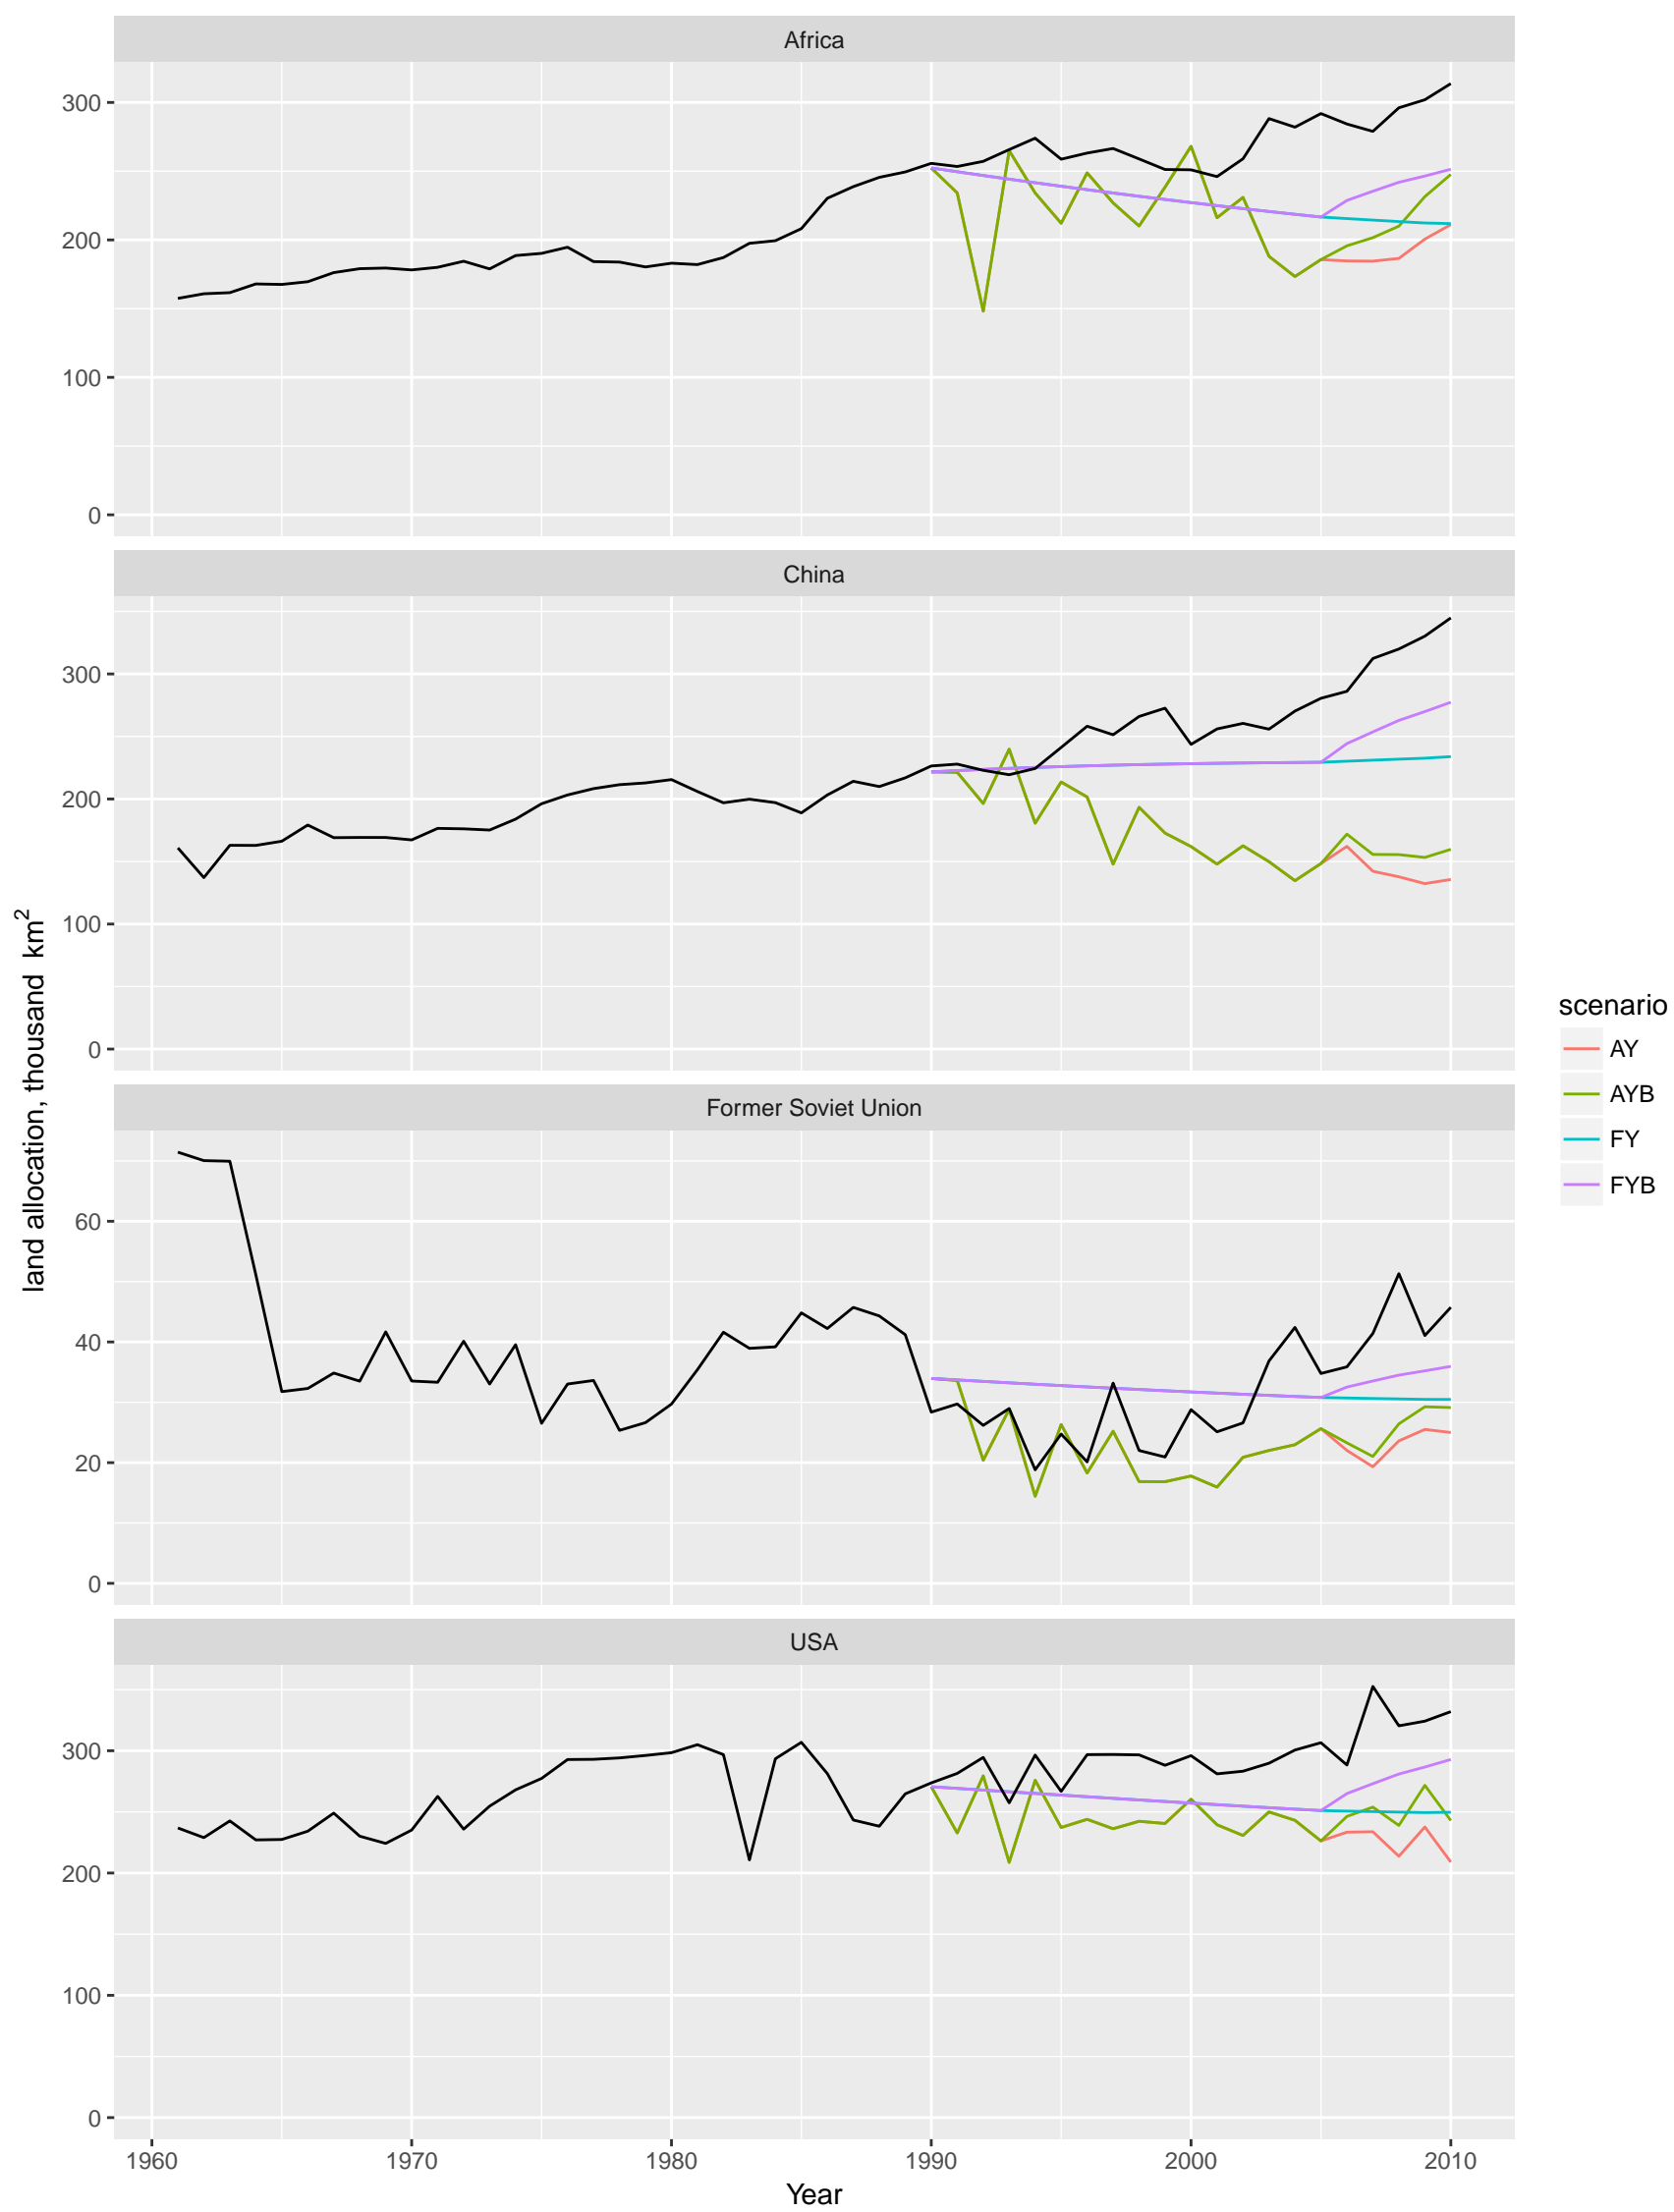

Supplement: Supplementary file 22 [file gmd-10-4307-2017-supplement.zip]

Normalized centered RMSE, all crops for each region

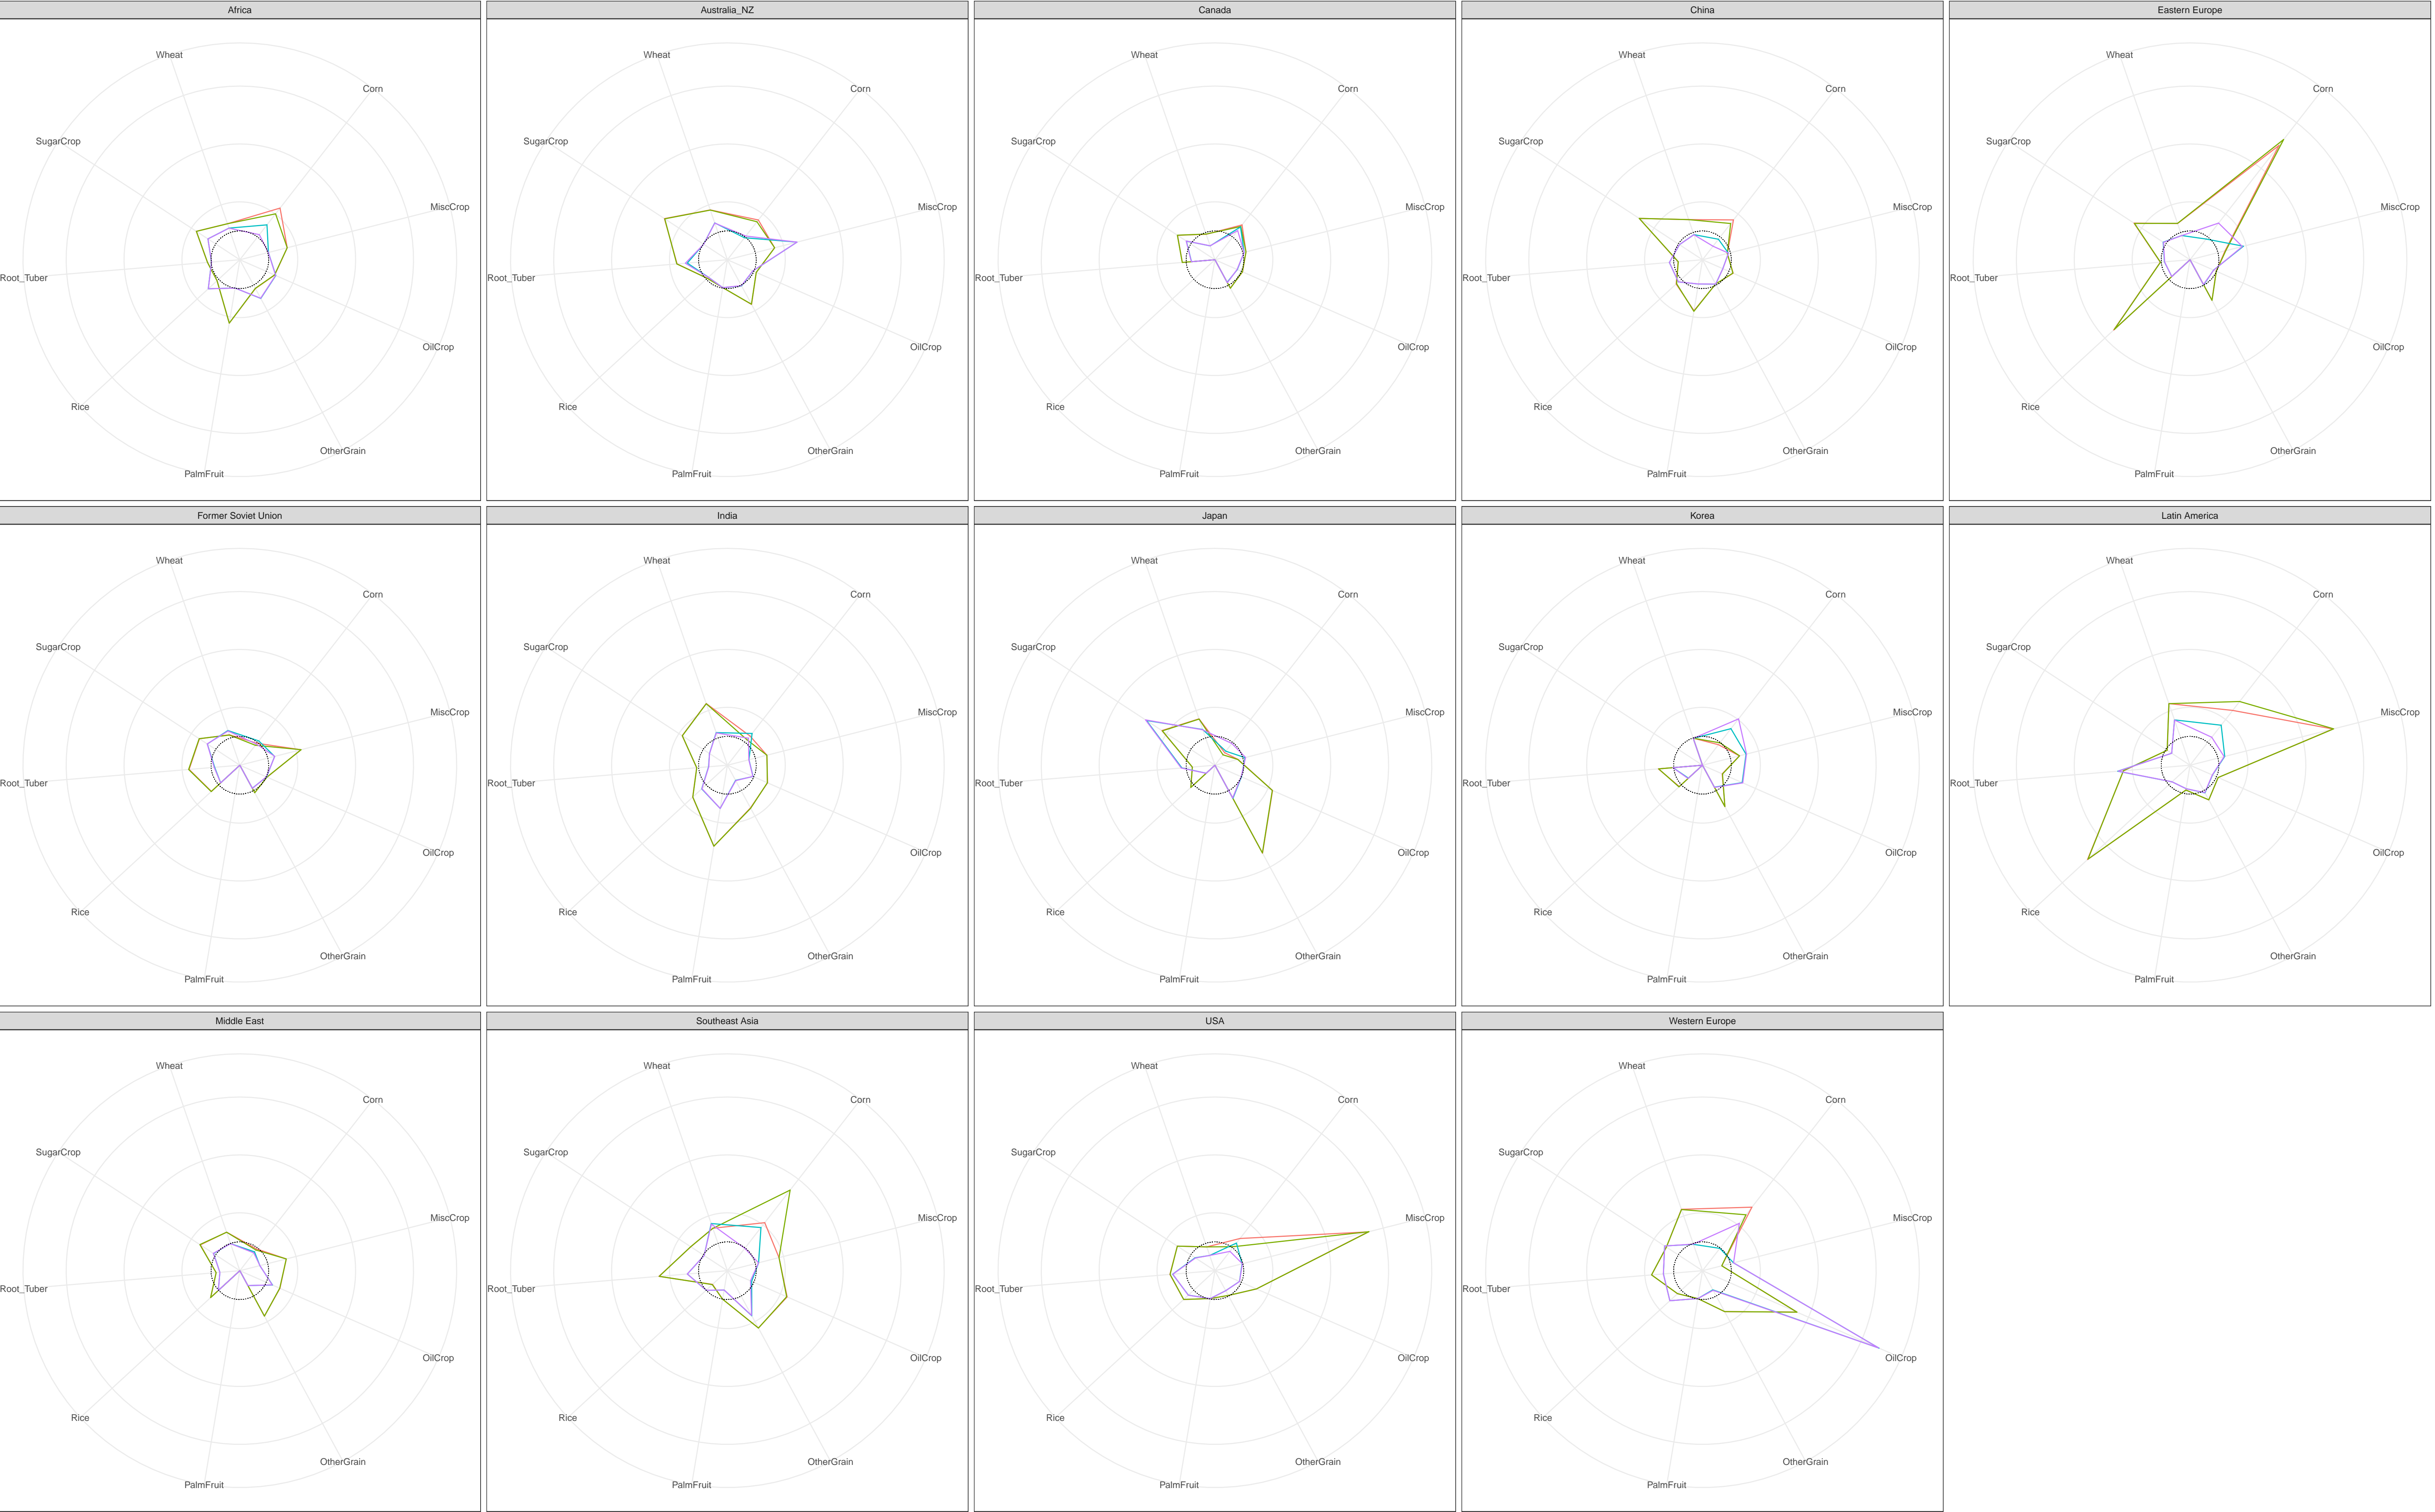

Supplement: Supplementary file 24 [file gmd-10-4307-2017-supplement.zip]

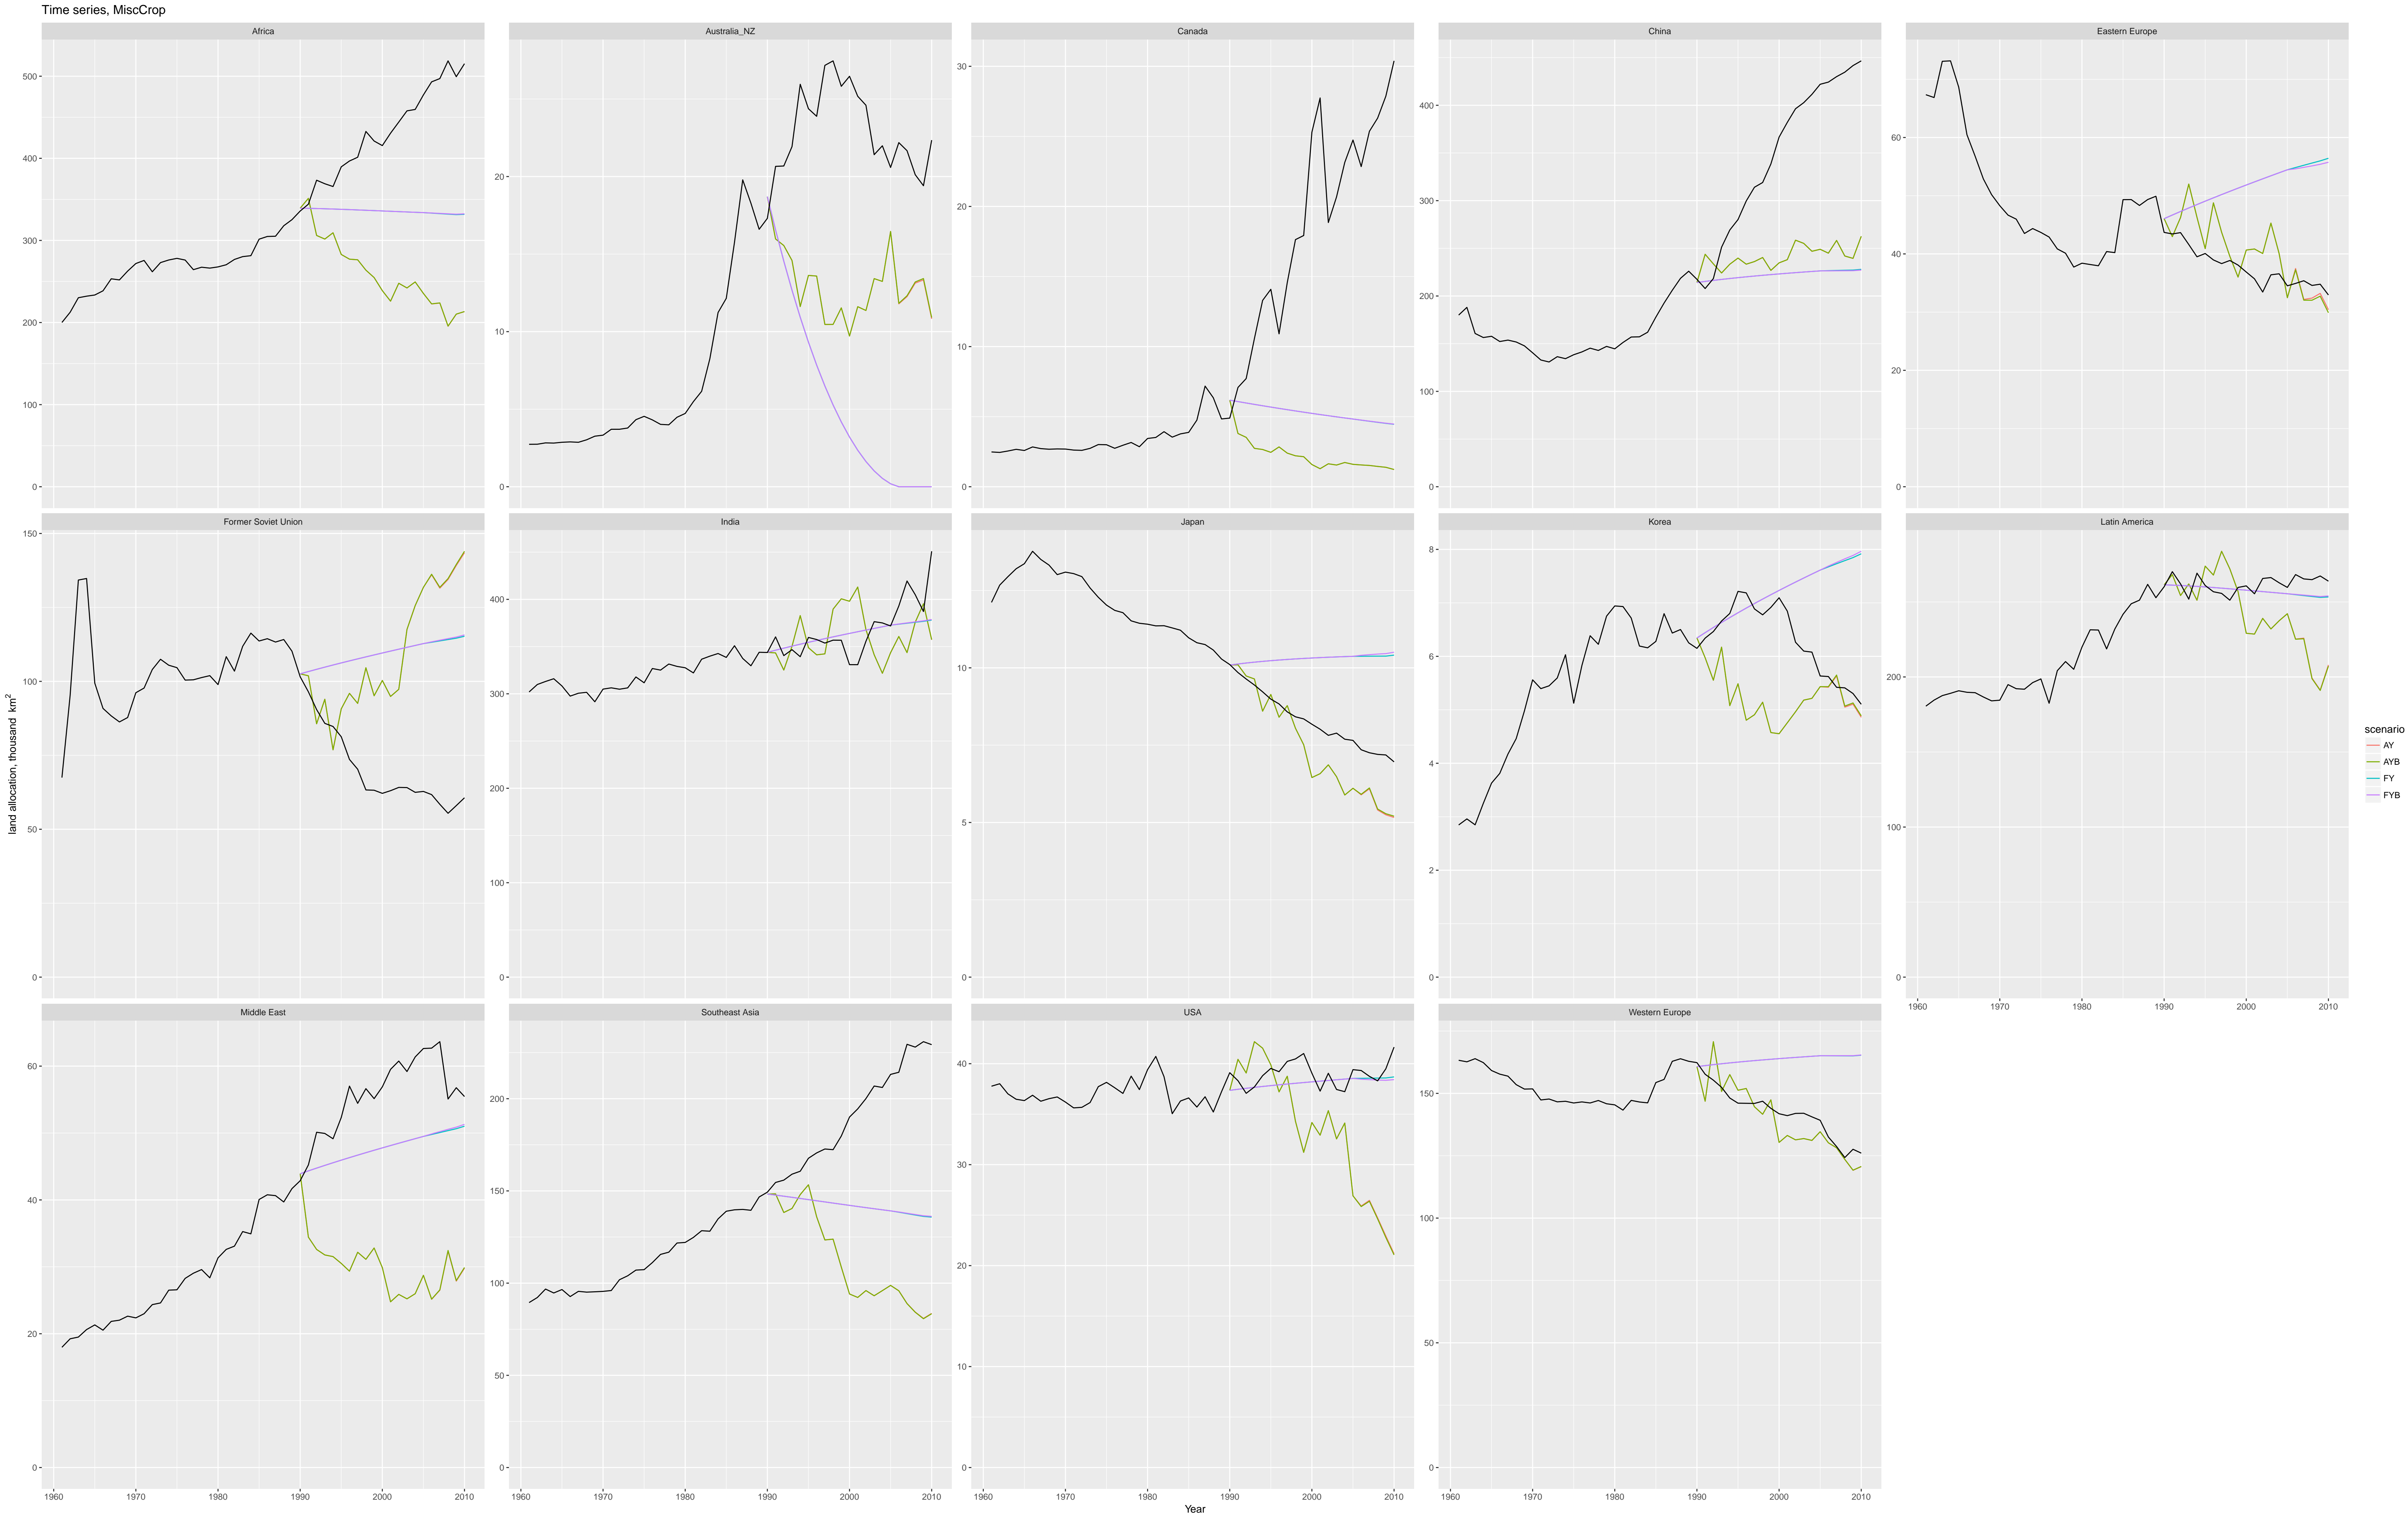

Supplement: Supplementary file 25 [file gmd-10-4307-2017-supplement.zip]

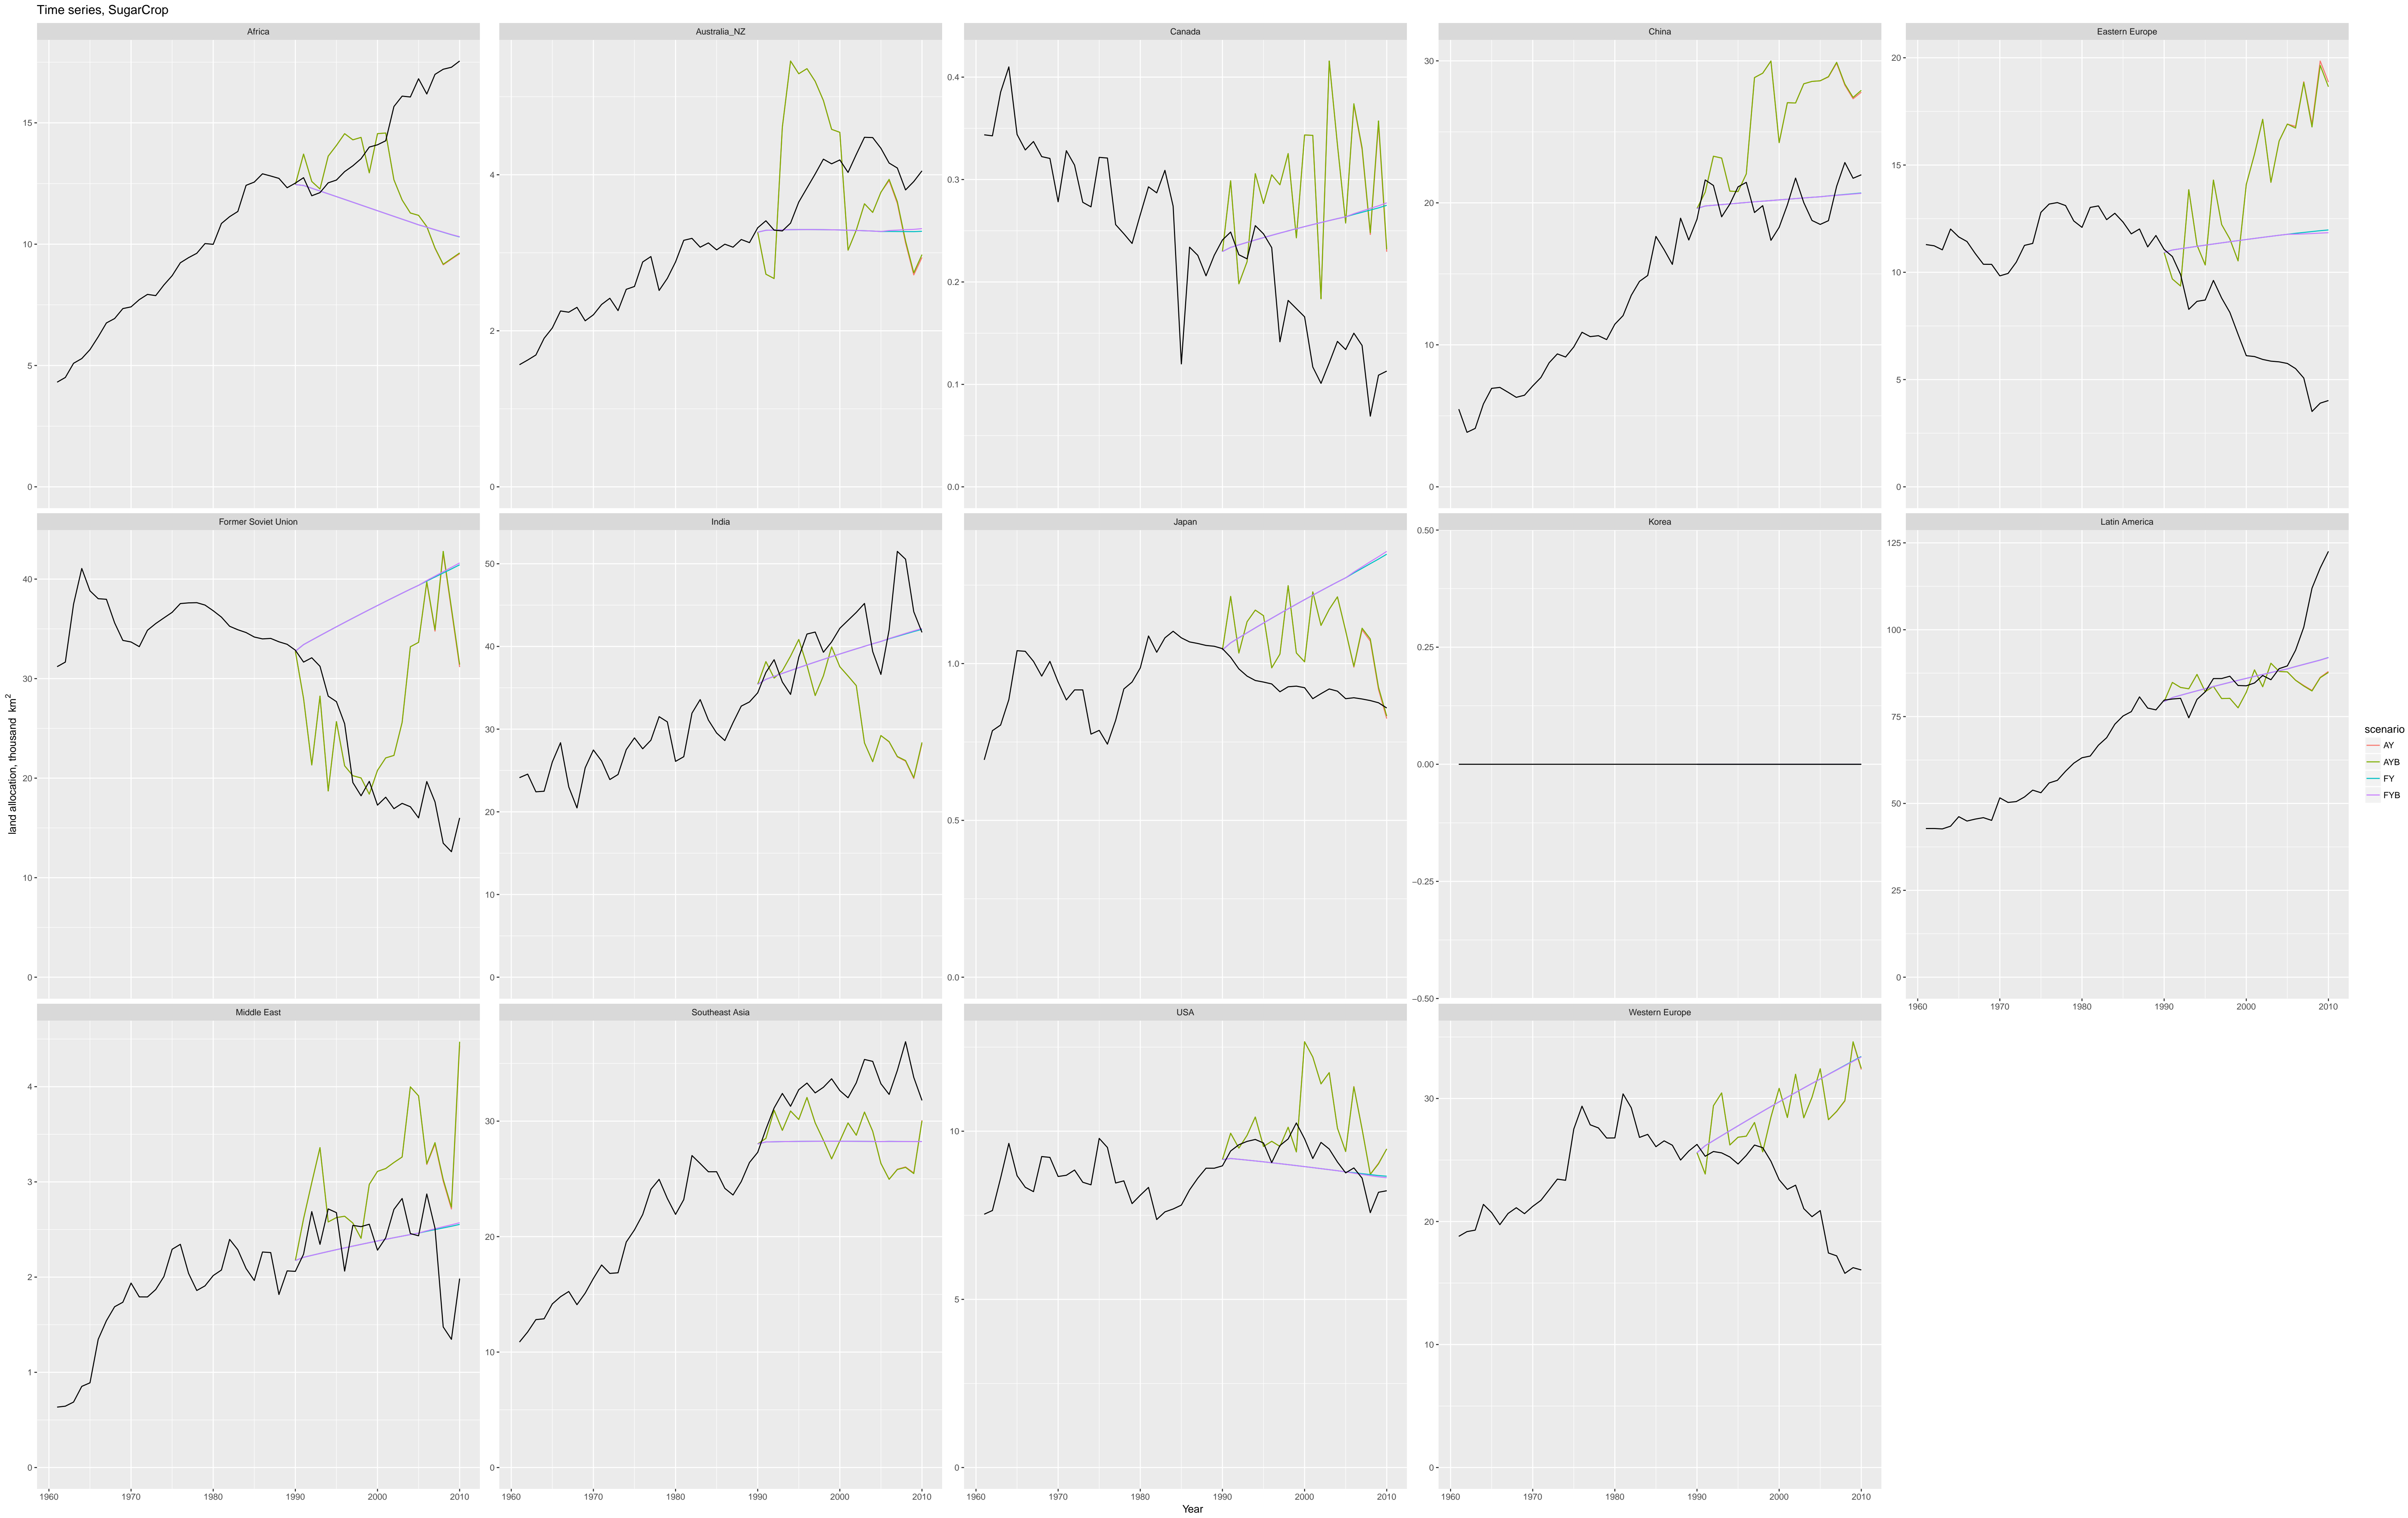

Supplement: Supplementary file 26 [file gmd-10-4307-2017-supplement.zip]

Normalized RMSE, all crops for each region

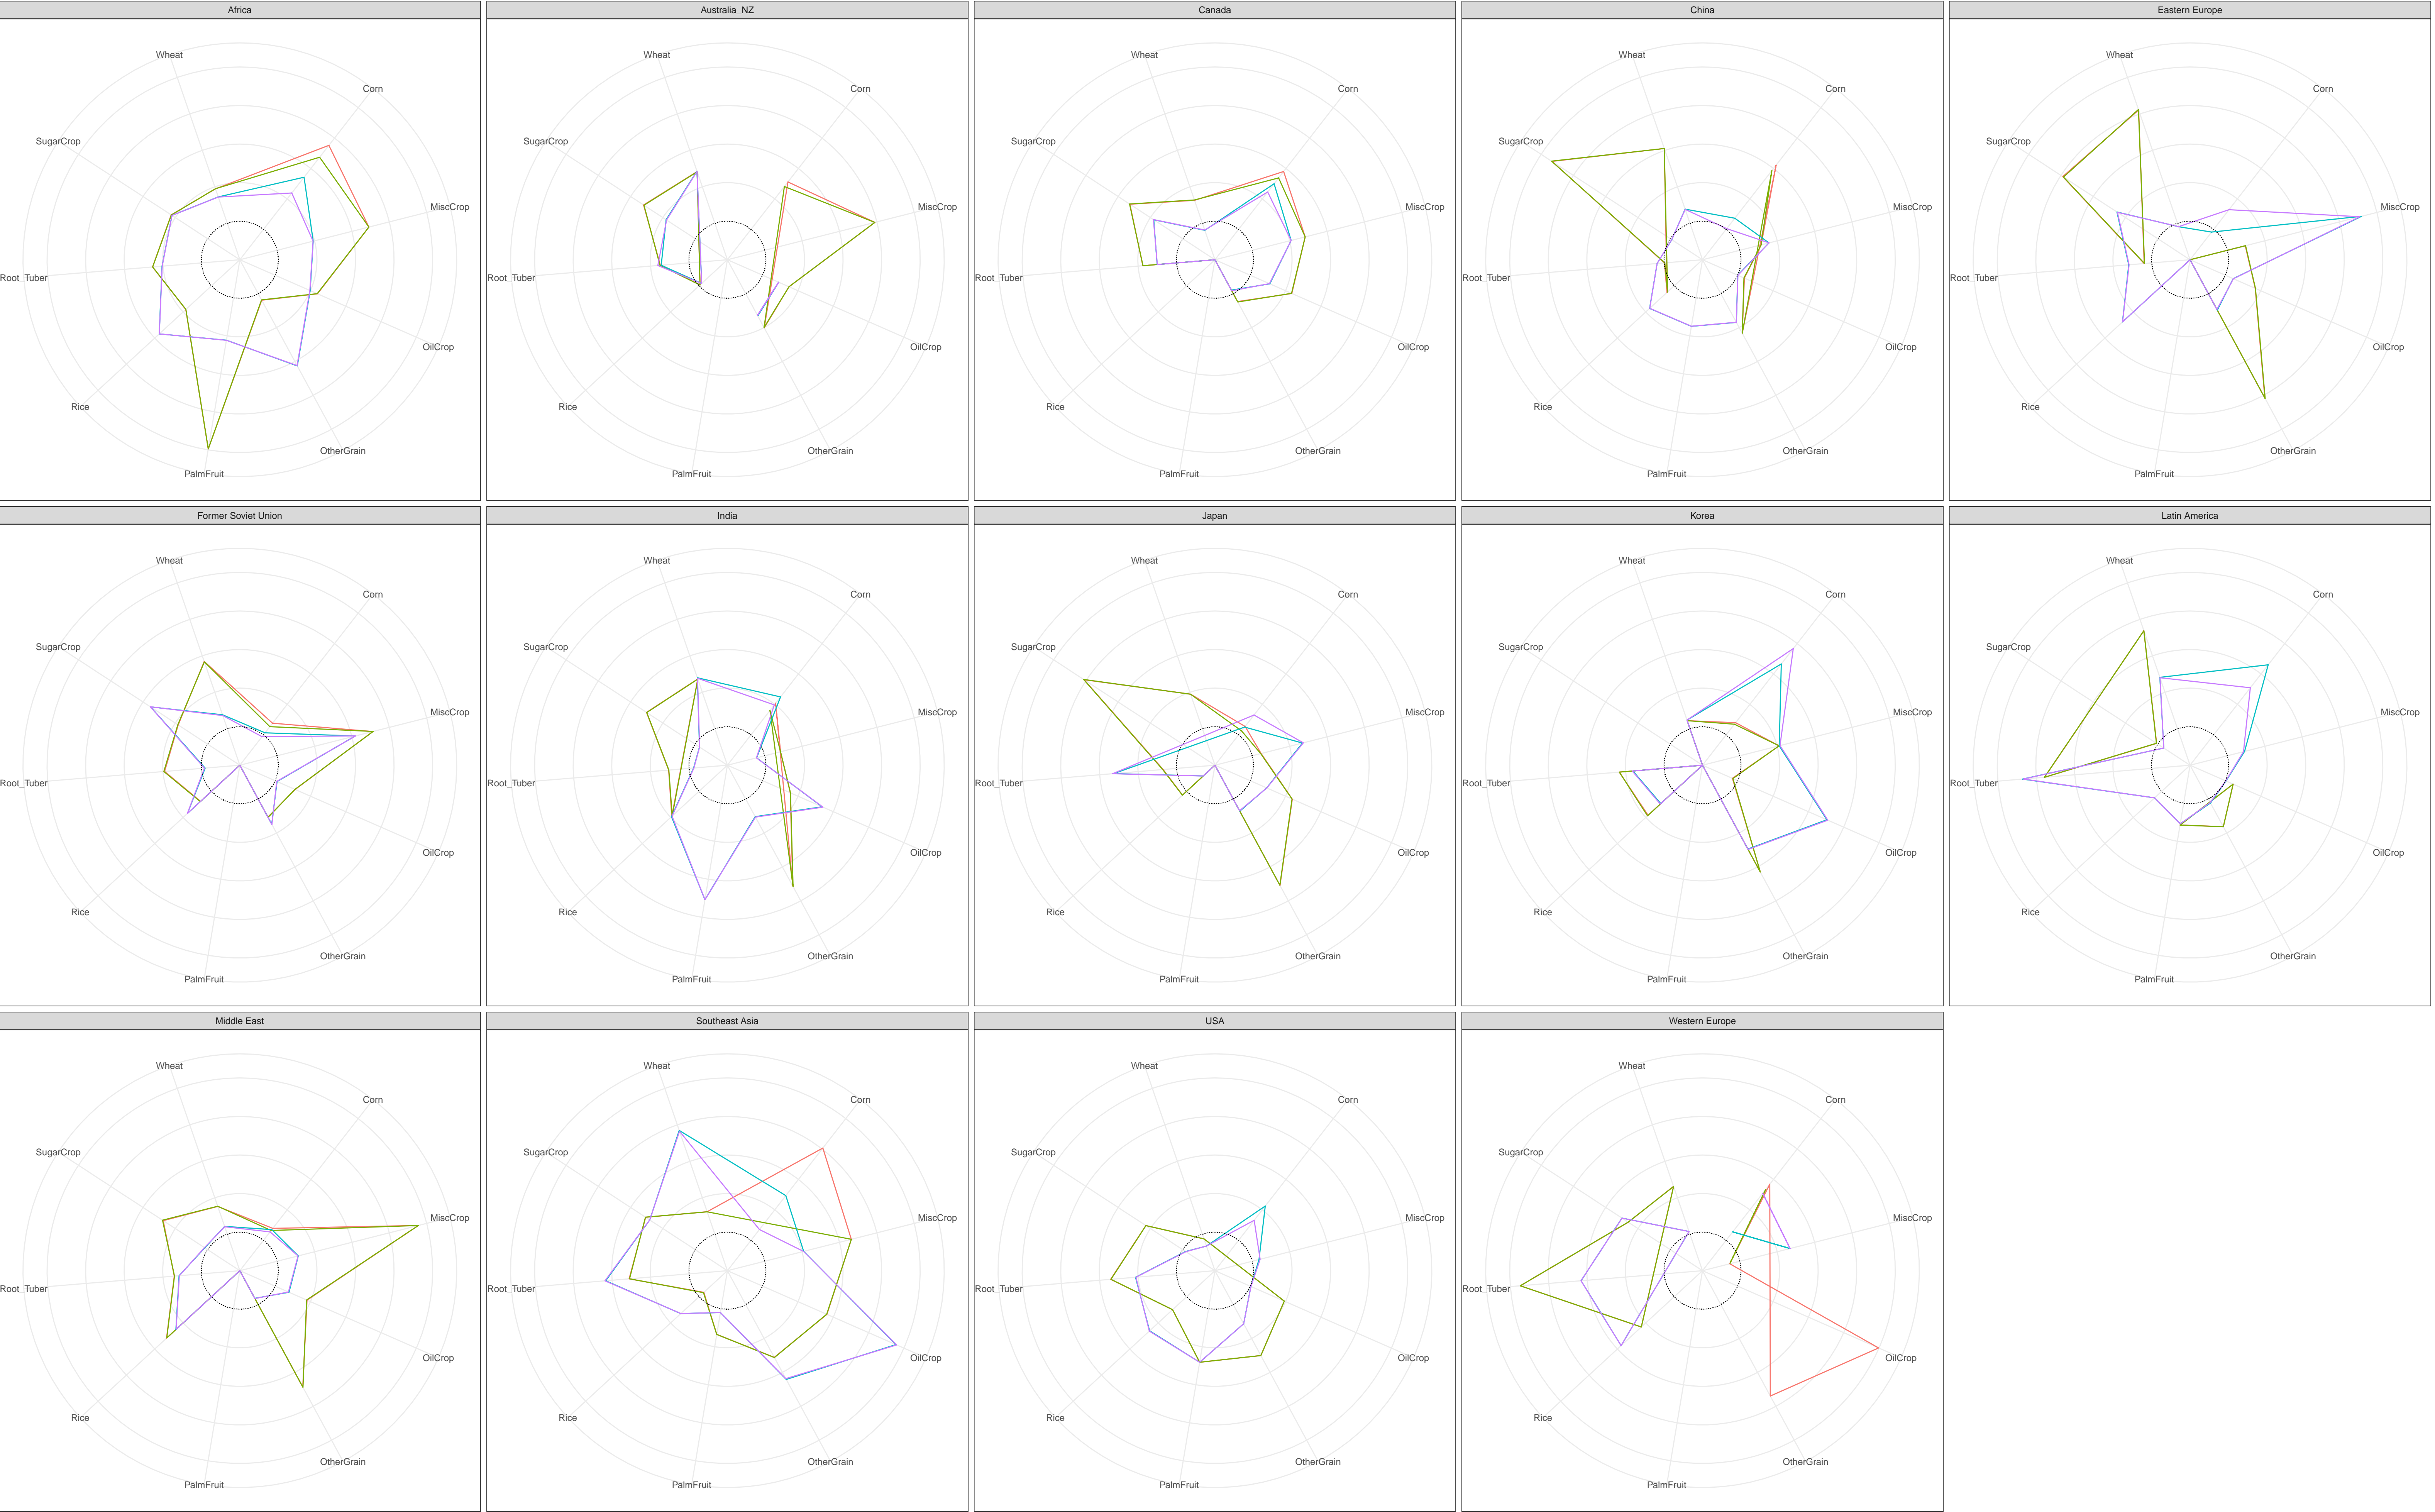

Supplement: Supplementary file 27 [file gmd-10-4307-2017-supplement.zip]

Time series, Wheat

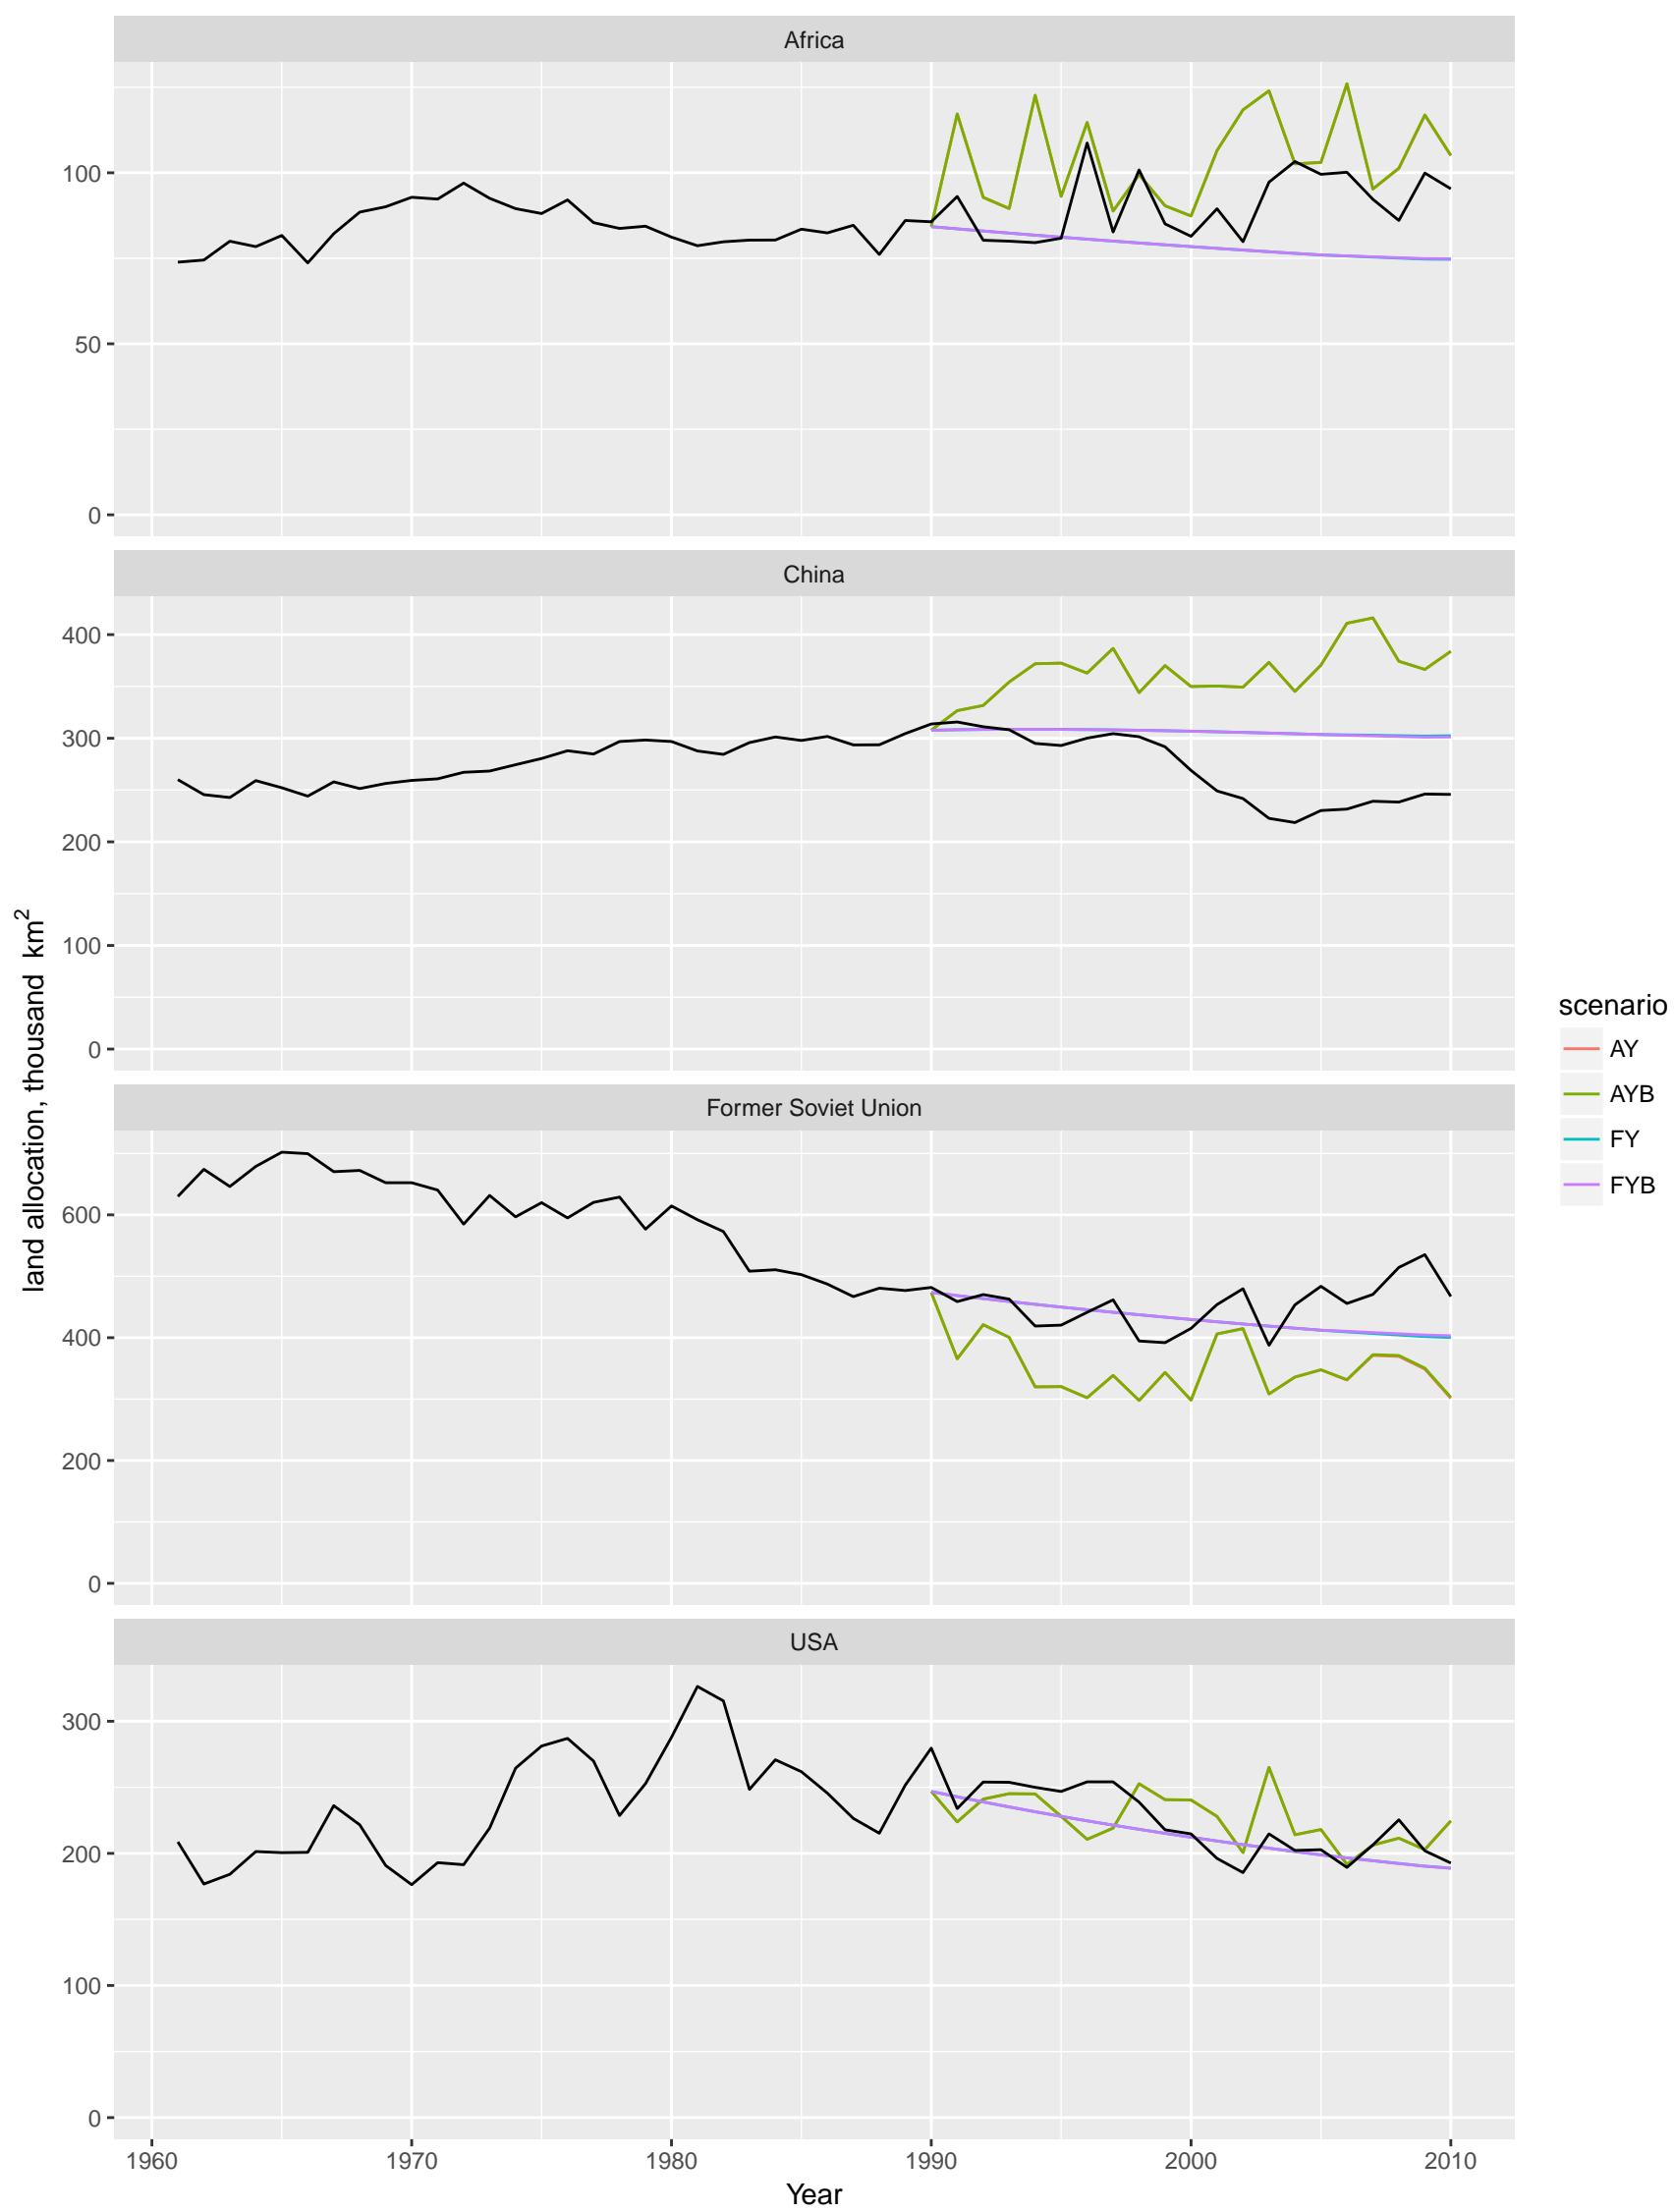

Supplement: Supplementary file 28 [file gmd-10-4307-2017-supplement.zip]

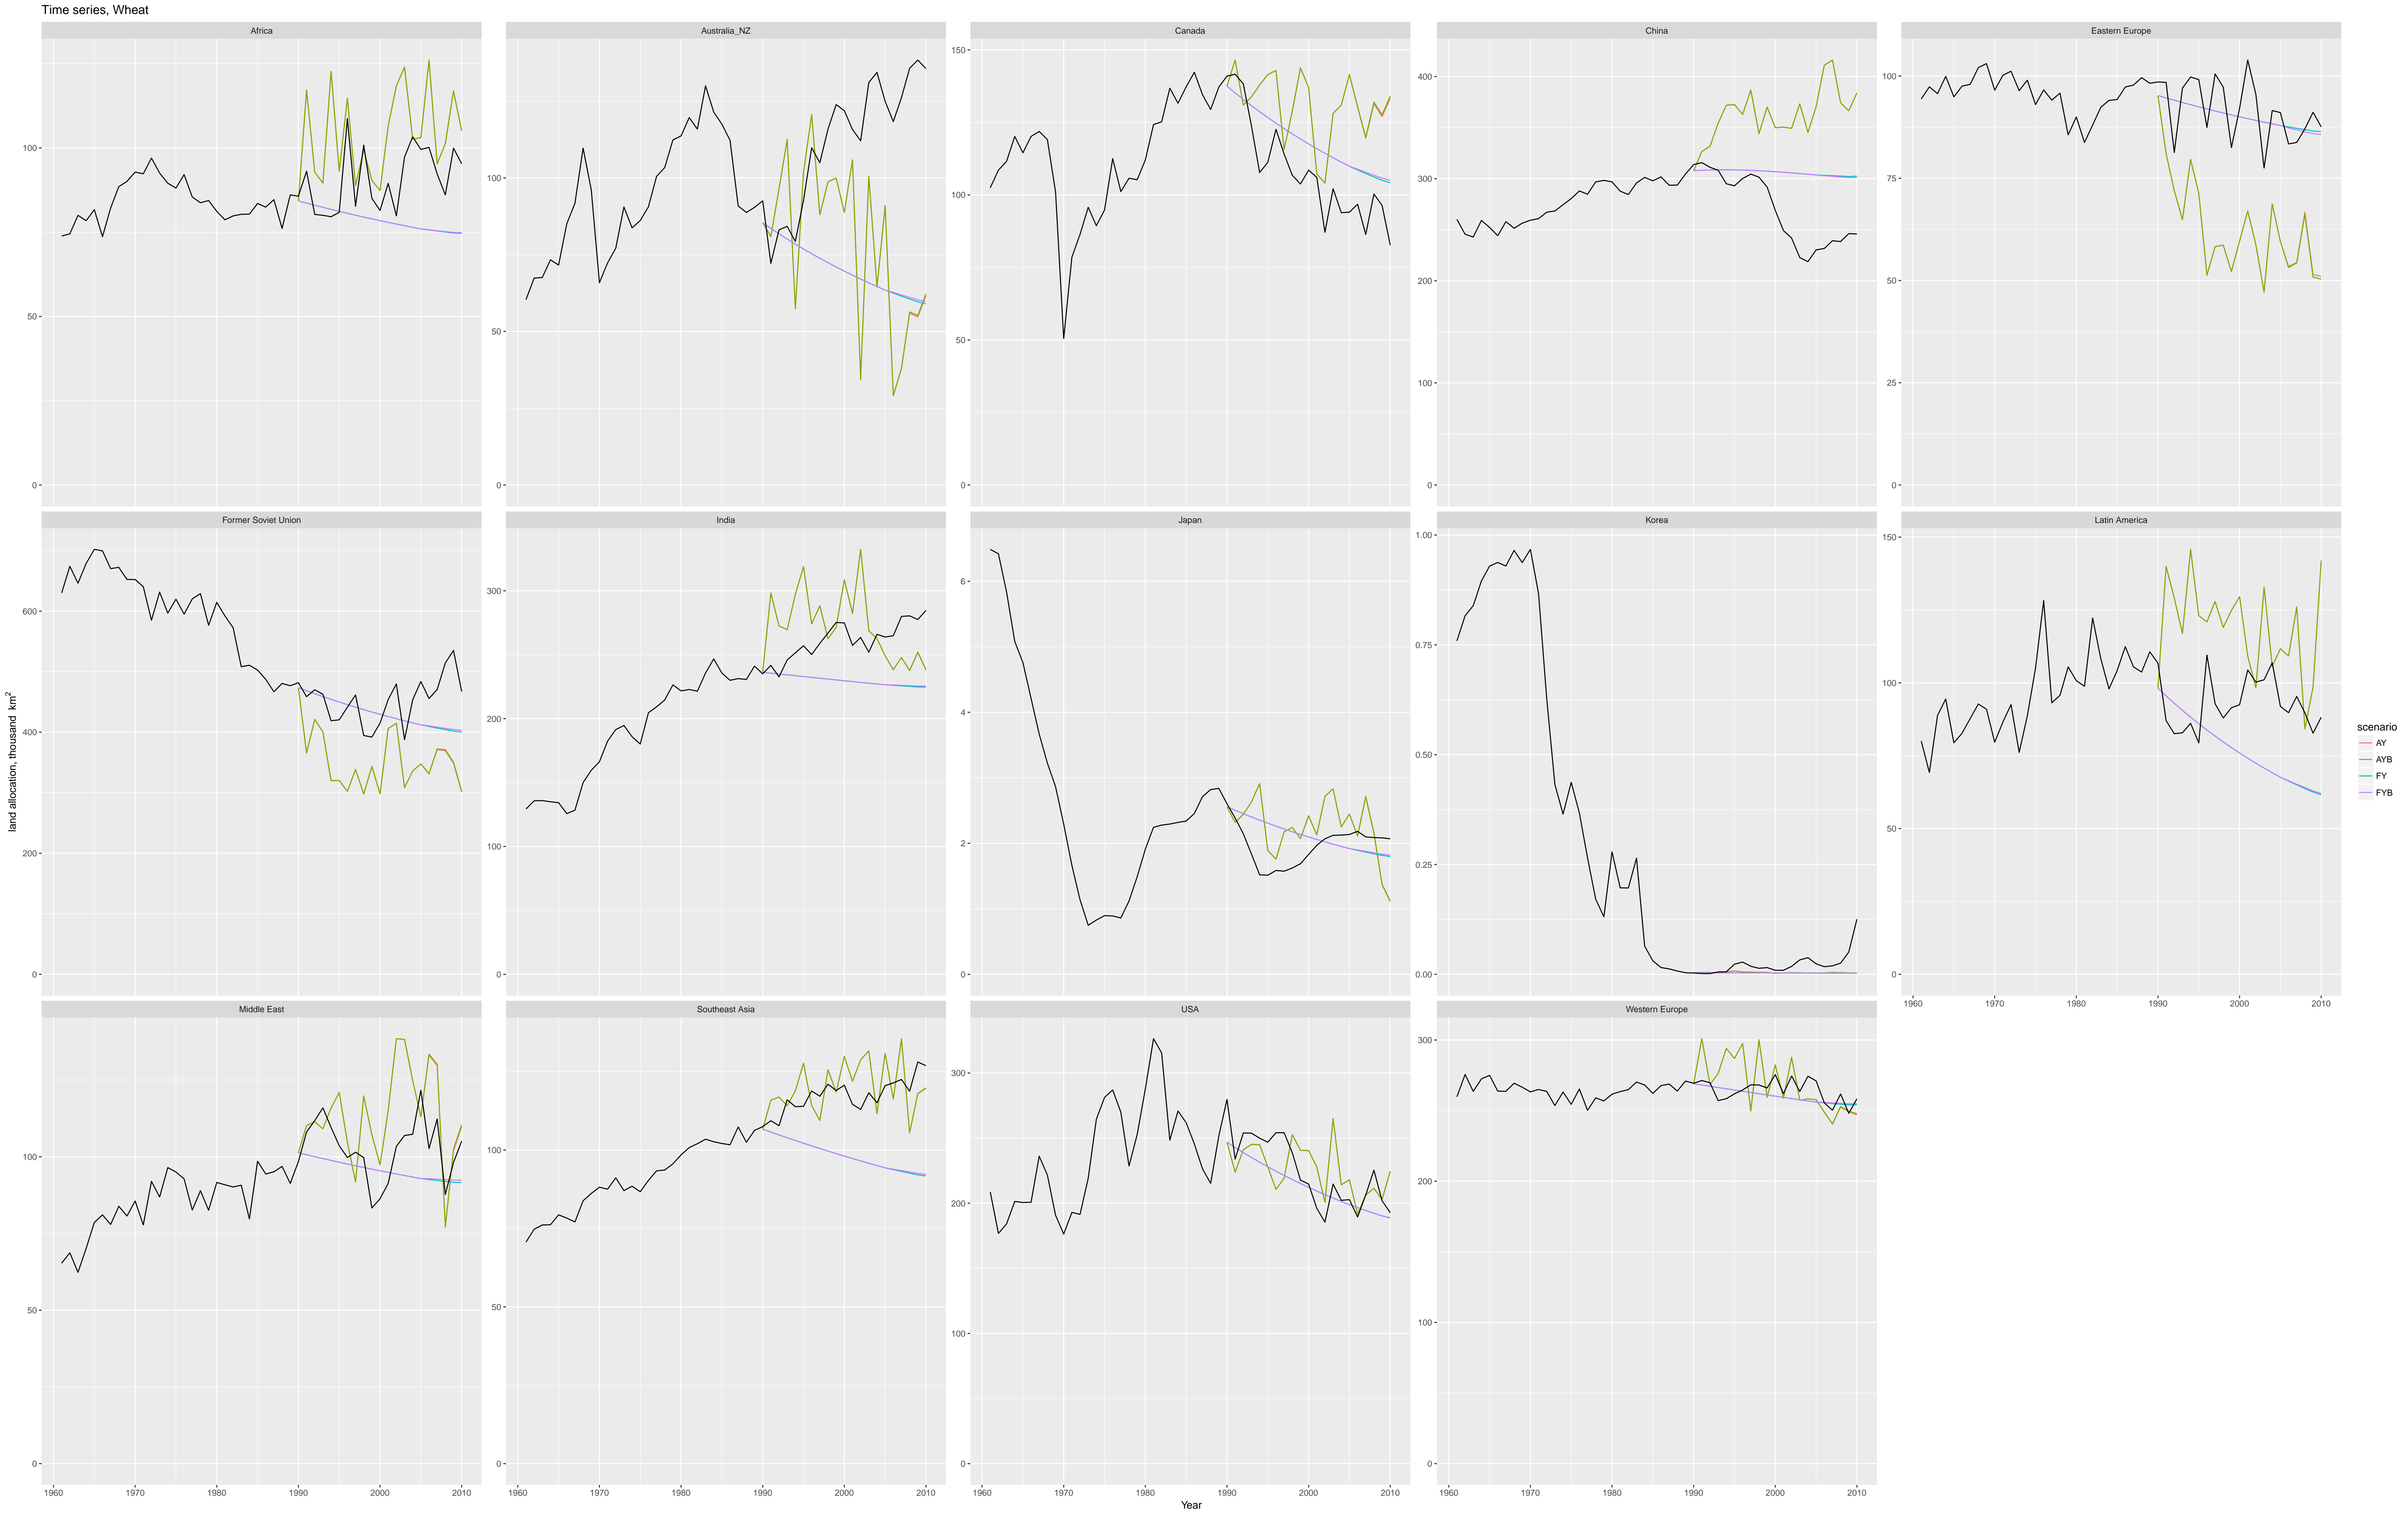

Supplement: Supplementary file 29 [file gmd-10-4307-2017-supplement.zip]
